# Supplementary material for: Greenhouse gas emissions from boreal inland waters unchanged after forest harvesting
Source: Copernicus journal article supplement (doi:10.5194/bg-2018-217), 2018-05-15
Supplement: Supplementary file 1 [file bg-2018-217-supplement.zip]

Archive with 6 entries (6 files):
- Klaus_BIOGEOSCIENCES_SUPPL_MAT_SUBMIT_.pdf
- Suppl_File_S1_DATA_Fig3.xlsx
- Suppl_File_S2_DATA_Fig4.txt
- Suppl_File_S3_DATA_Fig5.txt
- Suppl_File_S4_DATA_Fig6_7.xlsx
- Suppl_File_S5_DATA_Fig8.xlsx
