# Supplementary material for: Greenhouse gas emissions from boreal inland waters unchanged after forest harvesting
Source: Copernicus journal article supplement (doi:10.5194/bg-2018-217), 2018-05-15
Supplement: Supplementary file 1 [file bg-2018-217-supplement.zip › Suppl_File_S1_DATA_Fig3.xlsx]

## Sheet: Groundwater_concentration
			Before					After
			Control		Impact			Control		Impact
Figure	Substance	Soil depth [cm]	mean	se	mean	se	n	mean	se	mean	se	n
3A)	DIC	37.5 - 42.5	991.471	90.4841	957.059	98.7765	17	1345.02	65.6625	1846.07	96.7913	54
3C)	DIC	5 - 105	1380.22	171.628	1624.06	220.698	18	2119.46	110.109	2830.68	149.723	54
3B)	CH4	37.5 - 42.5	23.6653	7.0298	11.3688	4.178	17	16.4317	3.9235	94.3171	18.0576	52
3D)	CH4	5 - 105	81.9872	23.4483	87.95	22.7783	18	224.994	25.5669	366.116	31.2659	54
