# Supplementary material for: Greenhouse gas emissions from boreal inland waters unchanged after forest harvesting
Source: Copernicus journal article supplement (doi:10.5194/bg-2018-217), 2018-05-15
Supplement: Supplementary file 1 [file bg-2018-217-supplement.zip › Suppl_File_S2_DATA_Fig4.txt]

"Lake" "Year" "DOY" "Flux_Cole_Logger_CO2_mmol_m-2_d-1" "Flux_Cole_Logger_CO2_mmol_m-2_d-1_SE" "Flux_Vachon_Logger_CO2_mmol_m-2_d-1" "Flux_Vachon_Logger_CO2_mmol_m-2_d-1_SE" "Flux_Heiskanen_Logger_CO2_mmol_m-2_d-1" "Flux_Heiskanen_Logger_CO2_mmol_m-2_d-1_SE" "Flux_Cole_Spot_CO2_mmol_m-2_d-1" "Flux_Cole_Spot_CO2_mmol_m-2_d-1_SE" "Flux_Vachon_Spot_CO2_mmol_m-2_d-1" "Flux_Vachon_Spot_CO2_mmol_m-2_d-1_SE" "Flux_Heiskanen_Spot_CO2_mmol_m-2_d-1" "Flux_Heiskanen_Spot_CO2_mmol_m-2_d-1_SE"
"1" "ÖvreBjörntjärn" 2012 158 46.7982085986555 0 69.6658031428452 0 66.6763420048712 1.03757915661977 NA NA NA NA NA NA
"2" "ÖvreBjörntjärn" 2012 159 57.7068490643416 0 89.7161587830031 0 107.712641462625 0 NA NA NA NA NA NA
"3" "ÖvreBjörntjärn" 2012 160 49.2431587948852 0 76.4420499383502 0 82.2490809963269 0 NA NA NA NA NA NA
"4" "ÖvreBjörntjärn" 2012 161 40.9621933551136 0 59.2377431376107 0 57.5526565131691 0 NA NA NA NA NA NA
"5" "ÖvreBjörntjärn" 2012 162 37.0362867000238 0 53.0879095586812 0 44.7761558016187 0 NA NA NA NA NA NA
"6" "ÖvreBjörntjärn" 2012 163 38.2850616246319 0 55.7525217112576 0 43.0676617098549 0 NA NA NA NA NA NA
"7" "ÖvreBjörntjärn" 2012 164 46.4762641252857 0 70.1901687520827 0 75.3040271310954 0 NA NA NA NA NA NA
"8" "ÖvreBjörntjärn" 2012 165 47.9763448352895 0 75.2719874024422 0 86.2560776631092 0 NA NA NA NA NA NA
"9" "ÖvreBjörntjärn" 2012 166 46.0837933182605 0 69.0533656084237 0 81.4091617976931 0 NA NA NA NA NA NA
"10" "ÖvreBjörntjärn" 2012 167 49.6948528675982 0 76.2995864802082 0 94.2301052409488 0 NA NA NA NA NA NA
"11" "ÖvreBjörntjärn" 2012 168 46.3174436104899 0 69.2552368446252 0 86.6351337240614 0 NA NA NA NA NA NA
"12" "ÖvreBjörntjärn" 2012 169 36.5224004919659 0 54.6727518405889 0 53.668772177461 0 NA NA NA NA NA NA
"13" "ÖvreBjörntjärn" 2012 170 51.9561539045286 0 79.6644826782622 0 99.6499634015136 0.0176549129831346 68.5194200632813 0 102.181778918287 0 135.196248153461 0
"14" "ÖvreBjörntjärn" 2012 171 39.9344583734664 0 60.489171618795 0 67.1418638329837 0 NA NA NA NA NA NA
"15" "ÖvreBjörntjärn" 2012 172 63.590942650177 0 94.4878756854094 0 133.938141701303 0 NA NA NA NA NA NA
"16" "ÖvreBjörntjärn" 2012 173 66.0336155295901 0 98.9856735051377 0 138.210428925302 0 NA NA NA NA NA NA
"17" "ÖvreBjörntjärn" 2012 174 49.6354560562729 0 78.5803438941455 0 91.8740644973914 0 NA NA NA NA NA NA
"18" "ÖvreBjörntjärn" 2012 175 49.6624282796176 0 76.4958023392916 0 97.0299942191508 0 NA NA NA NA NA NA
"19" "ÖvreBjörntjärn" 2012 176 41.4241980505487 0 61.047857530941 0 71.7728844949758 0 NA NA NA NA NA NA
"20" "ÖvreBjörntjärn" 2012 177 40.2679955055471 0 59.1296129179069 0 68.2217422412099 0 NA NA NA NA NA NA
"21" "ÖvreBjörntjärn" 2012 178 43.689246543043 0 65.1587994571866 0 82.8270142688273 0 NA NA NA NA NA NA
"22" "ÖvreBjörntjärn" 2012 179 55.1895125930262 0 85.6149312959028 0 114.768828294307 0 NA NA NA NA NA NA
"23" "ÖvreBjörntjärn" 2012 180 45.982209536849 0 71.89253544125 0 84.515373498821 0 NA NA NA NA NA NA
"24" "ÖvreBjörntjärn" 2012 181 50.1709679692434 0 75.6449165966959 0 96.9945074732058 0 NA NA NA NA NA NA
"25" "ÖvreBjörntjärn" 2012 182 56.5335344538751 0 86.4439574543733 0 114.544064578093 0 NA NA NA NA NA NA
"26" "ÖvreBjörntjärn" 2012 183 47.7388901629661 0 72.4422516516498 0 77.401320163716 0.00105486692685513 NA NA NA NA NA NA
"27" "ÖvreBjörntjärn" 2012 184 59.460456672984 0 87.327441774459 0 120.537531990104 0 76.9774176495943 0 103.549081883884 0 156.546587445827 0
"28" "ÖvreBjörntjärn" 2012 185 50.6163473975681 0 76.7479375754268 0 101.643269801318 0 NA NA NA NA NA NA
"29" "ÖvreBjörntjärn" 2012 186 41.1563800380824 0 62.1304836487628 0 75.2378407327298 0 NA NA NA NA NA NA
"30" "ÖvreBjörntjärn" 2012 187 41.1187344427371 0 61.5825794096779 0 75.892779109529 0.00524239332522487 NA NA NA NA NA NA
"31" "ÖvreBjörntjärn" 2012 188 44.1021714523943 0 69.5626829681921 0 85.0507410127126 0 NA NA NA NA NA NA
"32" "ÖvreBjörntjärn" 2012 189 36.3981326937602 0 54.015450997385 0 60.0061434144055 0 NA NA NA NA NA NA
"33" "ÖvreBjörntjärn" 2012 190 33.1676968699515 0 50.6661390010634 0 57.6084798673585 0 NA NA NA NA NA NA
"34" "ÖvreBjörntjärn" 2012 191 39.5721192344882 0 61.9212412804058 0 69.5902632205515 0 NA NA NA NA NA NA
"35" "ÖvreBjörntjärn" 2012 192 52.1858812615696 0 80.7916687185803 0 113.108935672748 0 NA NA NA NA NA NA
"36" "ÖvreBjörntjärn" 2012 193 42.8832337672054 0 67.6209366267006 0 79.0629655775762 0 NA NA NA NA NA NA
"37" "ÖvreBjörntjärn" 2012 194 38.7944096409924 0 58.7747963851475 0 64.2739270229906 0 NA NA NA NA NA NA
"38" "ÖvreBjörntjärn" 2012 195 37.8272200259912 0 57.8547265601648 0 59.1325451167168 0 NA NA NA NA NA NA
"39" "ÖvreBjörntjärn" 2012 196 46.9713803835465 0 74.2413179165 0 85.2698711322016 0 NA NA NA NA NA NA
"40" "ÖvreBjörntjärn" 2012 197 43.0782623272219 0 67.4013268909303 0 73.8944254290703 0 NA NA NA NA NA NA
"41" "ÖvreBjörntjärn" 2012 198 60.2641974885383 0 90.9719002631075 0 124.356910577009 0 65.0238548028993 0 96.5547538066193 0 127.310908251114 0
"42" "ÖvreBjörntjärn" 2012 199 61.898578640865 0 96.141450966907 0 130.043740391986 0 NA NA NA NA NA NA
"43" "ÖvreBjörntjärn" 2012 200 54.7595898833645 0 86.5578424117605 0 104.756415170915 0 NA NA NA NA NA NA
"44" "ÖvreBjörntjärn" 2012 201 52.6118272154811 0 82.2335210504068 0 100.136644919801 0 NA NA NA NA NA NA
"45" "ÖvreBjörntjärn" 2012 202 57.0359329279059 0 88.7580902644635 0 117.322374697995 0 NA NA NA NA NA NA
"46" "ÖvreBjörntjärn" 2012 203 74.4338903181015 0 109.944250110628 0 164.039734804886 0 NA NA NA NA NA NA
"47" "ÖvreBjörntjärn" 2012 204 62.2155584633193 0 97.0476919368122 0 134.571494899088 0 NA NA NA NA NA NA
"48" "ÖvreBjörntjärn" 2012 205 51.8895883186739 0 80.4643454537215 0 95.7601175451039 0 NA NA NA NA NA NA
"49" "ÖvreBjörntjärn" 2012 206 50.954751211036 0 77.9302037287001 0 93.9818040692423 0 NA NA NA NA NA NA
"50" "ÖvreBjörntjärn" 2012 207 48.4438416876397 0 75.2990140269771 0 89.5588257925643 0 NA NA NA NA NA NA
"51" "ÖvreBjörntjärn" 2012 208 60.9954441397485 0 93.7014863523406 0 129.176742847844 0 NA NA NA NA NA NA
"52" "ÖvreBjörntjärn" 2012 209 46.1069844943436 0 71.8536596665218 0 82.9746313269131 0 NA NA NA NA NA NA
"53" "ÖvreBjörntjärn" 2012 210 51.0621312341637 0 78.9200103234679 0 102.993581950627 0 NA NA NA NA NA NA
"54" "ÖvreBjörntjärn" 2012 211 44.7453290175293 0 69.3049260255017 0 76.6985414341694 0.0723474022403528 NA NA NA NA NA NA
"55" "ÖvreBjörntjärn" 2012 212 42.9112991376814 0 64.8263659047907 0 78.4126590002641 0 NA NA NA NA NA NA
"56" "ÖvreBjörntjärn" 2012 213 52.0349891896761 0 80.2253408555647 0 101.621110562529 0 51.0155596075111 0 80.4256439114163 0 91.774520587154 0
"57" "ÖvreBjörntjärn" 2012 214 44.7378858646429 0 69.5169173062592 0 86.4857228771491 0 NA NA NA NA NA NA
"58" "ÖvreBjörntjärn" 2012 215 52.5982272653117 0 77.4172934897715 0 107.409147498726 0 NA NA NA NA NA NA
"59" "ÖvreBjörntjärn" 2012 216 40.1381092289771 0 57.5172554166803 0 63.309937655782 0 NA NA NA NA NA NA
"60" "ÖvreBjörntjärn" 2012 217 39.4326926124682 0 57.1543651247011 0 60.4851910532909 0 NA NA NA NA NA NA
"61" "ÖvreBjörntjärn" 2012 218 43.2282606183516 0 63.3523171048262 0 76.6568228801926 0 NA NA NA NA NA NA
"62" "ÖvreBjörntjärn" 2012 219 41.9708010777286 0 64.458450552184 0 82.9573359930256 0 NA NA NA NA NA NA
"63" "ÖvreBjörntjärn" 2012 220 40.9304071964084 0 62.8510665424707 0 81.2126293463062 0 NA NA NA NA NA NA
"64" "ÖvreBjörntjärn" 2012 221 59.6800876244296 0 92.8543789957043 0 119.10954541422 0 NA NA NA NA NA NA
"65" "ÖvreBjörntjärn" 2012 222 50.5758622033352 0 73.6576287187492 0 93.2604578621056 0 NA NA NA NA NA NA
"66" "ÖvreBjörntjärn" 2012 223 49.7213653416363 0 75.6601556535074 0 97.5385456350735 0.0472429335959626 NA NA NA NA NA NA
"67" "ÖvreBjörntjärn" 2012 224 55.4444131077194 0 86.2373182071587 0 115.188445384376 0.00657529116125159 51.3267920115584 0 79.8758048331531 0 96.9963493931914 0
"68" "ÖvreBjörntjärn" 2012 225 43.7567448039507 0 66.5381903221656 0 69.3021527347479 0 NA NA NA NA NA NA
"69" "ÖvreBjörntjärn" 2012 226 43.9646579081495 0 64.7101013124801 0 80.7117190444856 0 NA NA NA NA NA NA
"70" "ÖvreBjörntjärn" 2012 227 41.5240474469443 0 61.0088474353415 0 75.9471876861537 0 NA NA NA NA NA NA
"71" "ÖvreBjörntjärn" 2012 228 38.4959309927223 0 54.9734693192769 0 62.5361702903826 0 NA NA NA NA NA NA
"72" "ÖvreBjörntjärn" 2012 229 37.7846898690379 0 54.0217429414628 0 59.2821885723735 0 NA NA NA NA NA NA
"73" "ÖvreBjörntjärn" 2012 230 40.229383476168 0 61.1243223433161 0 76.0380336652853 0.0118775513510394 NA NA NA NA NA NA
"74" "ÖvreBjörntjärn" 2012 231 39.2936320478321 0 60.9227060374533 0 77.2316727776319 0 NA NA NA NA NA NA
"75" "ÖvreBjörntjärn" 2012 232 42.8188498014758 0 65.9626986045313 0 87.4253386820193 0 NA NA NA NA NA NA
"76" "ÖvreBjörntjärn" 2012 233 45.1115068227162 0 67.4927097568203 0 86.4200165868765 0 NA NA NA NA NA NA
"77" "ÖvreBjörntjärn" 2012 234 58.6324495426269 0 90.2611592920927 0 120.744851830424 0 NA NA NA NA NA NA
"78" "ÖvreBjörntjärn" 2012 235 62.4003628037059 0 96.0372925416959 0 123.822311718515 0 NA NA NA NA NA NA
"79" "ÖvreBjörntjärn" 2012 236 53.5311497514807 0 81.6675242719933 0 96.261419879682 0 NA NA NA NA NA NA
"80" "ÖvreBjörntjärn" 2012 237 50.0736501326475 0 73.2779096940224 0 85.4584498213476 0 NA NA NA NA NA NA
"81" "ÖvreBjörntjärn" 2012 238 54.1397707689953 0 81.3311121190095 0 105.831598895896 0 NA NA NA NA NA NA
"82" "ÖvreBjörntjärn" 2012 239 54.0116936511553 0 79.8038233551284 0 103.475355624201 0 NA NA NA NA NA NA
"83" "ÖvreBjörntjärn" 2012 240 96.3977691746572 2.31584042474324 138.492534871435 3.30388667367548 220.686962988078 5.23526171238228 143.168078039862 0 198.474176906331 0 325.862186718303 0
"84" "ÖvreBjörntjärn" 2012 241 63.9069881207383 2.34138725832998 97.1503184809836 3.54932399519816 118.301949264137 4.24277400330394 NA NA NA NA NA NA
"85" "ÖvreBjörntjärn" 2012 242 65.0925094979451 2.24783360065824 103.092671627674 3.56023440187869 124.171399775413 4.2506702790867 NA NA NA NA NA NA
"86" "ÖvreBjörntjärn" 2012 243 54.5326150542284 1.86001969128175 74.0835029871633 2.54669136224198 59.9619843307817 2.19743467363102 NA NA NA NA NA NA
"87" "ÖvreBjörntjärn" 2012 244 50.4050616760504 1.85571558705097 61.1191810661287 2.2501672094193 41.1345343038848 1.64661253290205 NA NA NA NA NA NA
"88" "ÖvreBjörntjärn" 2012 245 54.6208642230517 1.76771562524041 78.9846611815436 2.55357877988147 87.0752076943725 2.76031846565544 NA NA NA NA NA NA
"89" "ÖvreBjörntjärn" 2012 246 65.5494546710172 2.34412446745851 103.430752656518 3.70026753351801 117.924985976089 4.21688439653188 NA NA NA NA NA NA
"90" "ÖvreBjörntjärn" 2012 247 79.3699247079777 2.97740947578779 123.423293027616 4.62953814219687 164.749441246449 6.16716703988222 NA NA NA NA NA NA
"91" "ÖvreBjörntjärn" 2012 248 74.2446425047294 2.57648323665783 114.925278091063 3.98613737042476 149.800040715858 5.10966106881891 NA NA NA NA NA NA
"92" "ÖvreBjörntjärn" 2012 249 149.629837736841 4.58204760237879 185.209168507361 5.68838688202403 303.498904972685 9.32071274258802 NA NA NA NA NA NA
"93" "ÖvreBjörntjärn" 2012 250 113.464065933599 4.0345379136879 161.412545871654 5.7448479979028 251.710445165577 8.92529423154636 NA NA NA NA NA NA
"94" "ÖvreBjörntjärn" 2012 251 71.7438663622601 1.94914198707535 109.143525518103 2.9574427206119 158.256282360539 4.23175699467556 NA NA NA NA NA NA
"95" "ÖvreBjörntjärn" 2012 252 90.2426564880671 2.93011242820412 140.556561391993 4.56357133218233 201.349177114909 6.49681468781948 NA NA NA NA NA NA
"96" "ÖvreBjörntjärn" 2012 253 74.30440339448 2.50318924244057 114.895786360037 3.87832883037638 150.334873405051 5.0290136722119 NA NA NA NA NA NA
"97" "ÖvreBjörntjärn" 2012 254 65.1297100349905 1.36800126611563 94.2571837857696 1.87383921822011 119.715690597679 2.78013029380199 81.1642952797587 0 129.434788419758 0 137.253634789983 0
"98" "ÖvreBjörntjärn" 2012 255 78.0644438122715 0 119.621954259836 0 144.113708951425 0.424513083586816 NA NA NA NA NA NA
"99" "ÖvreBjörntjärn" 2012 256 71.8248112960779 0 113.178855074048 0 125.303856804393 0.456994710797729 NA NA NA NA NA NA
"100" "ÖvreBjörntjärn" 2012 257 74.6209017176007 0 112.823948637073 0 153.953551517471 0 NA NA NA NA NA NA
"101" "ÖvreBjörntjärn" 2012 258 73.4577237621282 1.22212758598055 114.481899745366 1.89950589403971 149.490211838748 2.47612394762093 NA NA NA NA NA NA
"102" "ÖvreBjörntjärn" 2012 259 78.5788573723095 1.35241331440957 108.7844814085 1.86086886193129 159.195869706584 2.7125537761028 NA NA NA NA NA NA
"103" "ÖvreBjörntjärn" 2012 260 72.0717761849672 1.19477213843584 111.836900041171 1.85320888469467 139.605227056901 2.34318477758806 NA NA NA NA NA NA
"104" "ÖvreBjörntjärn" 2012 261 63.9590593563741 1.04404614356614 92.9359314486147 1.50011970739285 110.258555233262 1.79800904034696 NA NA NA NA NA NA
"105" "ÖvreBjörntjärn" 2012 262 71.817521855533 1.12304046408376 104.777618185241 1.62511460160788 147.678529121127 2.36671794191429 NA NA NA NA NA NA
"106" "ÖvreBjörntjärn" 2012 263 56.5683105901107 0.807179607659632 84.9672158730349 1.20692795030821 108.604088490487 1.59218383699622 NA NA NA NA NA NA
"107" "ÖvreBjörntjärn" 2012 264 92.2387036706853 1.32625635881001 133.485218339721 1.93016784197521 206.588754960724 3.00032341113658 NA NA NA NA NA NA
"108" "ÖvreBjörntjärn" 2012 265 81.8495472591057 1.18456396682025 126.335981151455 1.82749328258049 184.088730643849 2.65007706749005 NA NA NA NA NA NA
"109" "ÖvreBjörntjärn" 2012 266 53.9996937986246 0 75.5292697870496 0 108.488354009185 0 NA NA NA NA NA NA
"110" "ÖvreBjörntjärn" 2012 267 62.5880428567429 0 96.1148422712113 0 134.82210055305 0.015848201668076 NA NA NA NA NA NA
"111" "ÖvreBjörntjärn" 2012 268 65.3853294010086 0 102.178395766969 0 143.935780976208 0 NA NA NA NA NA NA
"112" "ÖvreBjörntjärn" 2012 269 59.7629714833105 0.311008761889949 94.6937975726684 0.484140123215088 125.868523813047 0.609141431817542 61.3492020424543 0 97.7986066977867 0 100.3004438623 0
"113" "ÖvreBjörntjärn" 2012 270 53.6712051452021 1.07959403723023 81.3998816718605 1.63464224251858 103.751028524016 2.09293731211572 NA NA NA NA NA NA
"114" "ÖvreBjörntjärn" 2012 271 72.0865502311255 1.64916323742193 112.086794797186 2.56425527669305 153.621023188706 3.52793780697812 NA NA NA NA NA NA
"115" "ÖvreBjörntjärn" 2012 272 65.2696334301356 1.464723034094 102.155819218789 2.29355485805749 135.871935116418 3.06640070854982 NA NA NA NA NA NA
"116" "ÖvreBjörntjärn" 2012 273 50.6676500836881 1.11461384063279 74.5079599854577 1.64038117042037 88.9292623138644 1.94192041488607 NA NA NA NA NA NA
"117" "ÖvreBjörntjärn" 2012 274 49.9944537360001 1.09561311963786 69.6446133195514 1.51024285871125 73.3815053823395 1.58730205785228 NA NA NA NA NA NA
"119" "ÖvreBjörntjärn" 2013 152 32.4906212046005 0 48.8372782353456 0 60.4954089651207 0 NA NA NA NA NA NA
"120" "ÖvreBjörntjärn" 2013 153 30.17447028252 0 44.2209731120989 0 46.1010228000431 0 NA NA NA NA NA NA
"121" "ÖvreBjörntjärn" 2013 154 42.7741541456727 0 62.117665929906 0 88.0369959144557 0 NA NA NA NA NA NA
"122" "ÖvreBjörntjärn" 2013 155 57.9925009510795 0 87.4827045491659 0 128.049126139197 0 NA NA NA NA NA NA
"123" "ÖvreBjörntjärn" 2013 156 57.1447949237943 0 85.887152370874 0 118.506742335255 0 NA NA NA NA NA NA
"124" "ÖvreBjörntjärn" 2013 157 41.5470994313403 0 65.7972867435465 0 76.1153533441497 0 NA NA NA NA NA NA
"125" "ÖvreBjörntjärn" 2013 158 37.6899598892367 0 57.1471817904424 0 68.8013872610304 0 NA NA NA NA NA NA
"126" "ÖvreBjörntjärn" 2013 159 37.3707195683774 0 57.4724377459127 0 77.4901323637494 0 NA NA NA NA NA NA
"127" "ÖvreBjörntjärn" 2013 160 28.552385646969 0 44.1885643595528 0 49.6666227919743 0 NA NA NA NA NA NA
"128" "ÖvreBjörntjärn" 2013 161 34.6736176870752 0 54.2763669473262 0 69.1542516893212 0 37.5083806526961 0 59.36101001659 0 62.3204827935098 0
"129" "ÖvreBjörntjärn" 2013 162 30.7507597482494 0 47.9201179401536 0 59.975680559263 0 NA NA NA NA NA NA
"130" "ÖvreBjörntjärn" 2013 163 27.4575001994731 0 40.9074438943382 0 50.203309902289 0 NA NA NA NA NA NA
"131" "ÖvreBjörntjärn" 2013 164 31.1251911789303 0 46.6315841609017 0 61.4763012813937 0 NA NA NA NA NA NA
"132" "ÖvreBjörntjärn" 2013 165 28.341929049662 0 43.3484051789522 0 46.7191009687999 0 NA NA NA NA NA NA
"133" "ÖvreBjörntjärn" 2013 166 43.7980173307228 0 64.2230373197841 0 93.0368997807652 0 NA NA NA NA NA NA
"134" "ÖvreBjörntjärn" 2013 167 29.5324546952328 0 46.0507155590042 0 53.7216664404062 0 NA NA NA NA NA NA
"135" "ÖvreBjörntjärn" 2013 168 33.7829108059695 0 50.1977726682461 0 69.6007640725425 0 NA NA NA NA NA NA
"136" "ÖvreBjörntjärn" 2013 169 35.0941946482645 0 54.6613189006917 0 73.4400390376234 0 NA NA NA NA NA NA
"137" "ÖvreBjörntjärn" 2013 170 31.5481876530502 0 48.8105800622386 0 59.7942662393833 0 NA NA NA NA NA NA
"138" "ÖvreBjörntjärn" 2013 171 28.5015446424334 0 45.0714426638998 0 54.1620024210784 0 NA NA NA NA NA NA
"139" "ÖvreBjörntjärn" 2013 172 26.5066888986303 0 39.2627628899627 0 48.3912021741334 0 NA NA NA NA NA NA
"140" "ÖvreBjörntjärn" 2013 173 29.2991786676928 0 45.3197723653753 0 56.7822572325765 0 NA NA NA NA NA NA
"141" "ÖvreBjörntjärn" 2013 174 28.2005192462953 0 44.4159926207246 0 53.8442935769304 0 NA NA NA NA NA NA
"142" "ÖvreBjörntjärn" 2013 175 26.5220977436989 0 40.3566516887212 0 52.4122249539033 0 NA NA NA NA NA NA
"143" "ÖvreBjörntjärn" 2013 176 21.2380553683959 0 33.0186626436838 0 41.2100087038044 0 NA NA NA NA NA NA
"144" "ÖvreBjörntjärn" 2013 177 26.0200138373467 0 40.4928984233267 0 56.0255322541389 0 NA NA NA NA NA NA
"145" "ÖvreBjörntjärn" 2013 178 29.3476499602745 0 46.2799227804646 0 59.5590663252512 0 23.010003874413 0 36.614520979587 0 38.1713540016083 0
"146" "ÖvreBjörntjärn" 2013 179 28.040325241683 0 42.5949095019278 0 49.6186772057288 0 NA NA NA NA NA NA
"147" "ÖvreBjörntjärn" 2013 180 23.4532617870576 0 35.3714490423228 0 38.7020463609376 0 NA NA NA NA NA NA
"148" "ÖvreBjörntjärn" 2013 181 21.7704800946014 0 32.9025266458742 0 35.9217542993168 0 NA NA NA NA NA NA
"149" "ÖvreBjörntjärn" 2013 182 19.4333590461789 0 29.3756436195758 0 33.3285388998334 0 NA NA NA NA NA NA
"150" "ÖvreBjörntjärn" 2013 183 19.4468578797669 0 30.1028113972029 0 40.6495978072406 0 NA NA NA NA NA NA
"151" "ÖvreBjörntjärn" 2013 184 38.0256360577463 0 57.8021727794395 0 75.0155772663441 0 NA NA NA NA NA NA
"152" "ÖvreBjörntjärn" 2013 185 42.3875160051342 0 67.1125732839051 0 81.0207212174103 0 NA NA NA NA NA NA
"153" "ÖvreBjörntjärn" 2013 186 47.0923000589862 0 73.987435135281 0 87.5194672424807 0 NA NA NA NA NA NA
"154" "ÖvreBjörntjärn" 2013 187 64.5951077720829 0 98.3756472943339 0 133.990484034173 0 NA NA NA NA NA NA
"155" "ÖvreBjörntjärn" 2013 188 60.1021431907361 0 91.3986056374472 0 123.649073706874 0 NA NA NA NA NA NA
"156" "ÖvreBjörntjärn" 2013 189 72.6463672390906 0 107.338599934695 0 158.591813343061 0 80.6434873810451 0 112.292466061864 0 163.559693823825 0
"157" "ÖvreBjörntjärn" 2013 190 56.6067429937267 0 89.2596291719794 0 114.093241070379 0 NA NA NA NA NA NA
"158" "ÖvreBjörntjärn" 2013 191 66.0974847851368 0 101.873626786499 0 139.524594675048 0 NA NA NA NA NA NA
"159" "ÖvreBjörntjärn" 2013 192 63.5251733183423 0 99.1510564465685 0 134.779172404247 0 NA NA NA NA NA NA
"160" "ÖvreBjörntjärn" 2013 193 52.2552207134333 0 82.1467130956903 0 97.5279827349957 0 NA NA NA NA NA NA
"161" "ÖvreBjörntjärn" 2013 194 48.4504093993669 0.438944638338734 74.0613017990777 0.681558083814999 95.3712715642661 0.924581848215438 NA NA NA NA NA NA
"162" "ÖvreBjörntjärn" 2013 195 60.2673271309103 2.52933740686348 92.4040059888853 3.88735978593779 130.356978010029 5.41983262594491 NA NA NA NA NA NA
"163" "ÖvreBjörntjärn" 2013 196 50.6979729991541 0.920289040885218 78.7599905352654 1.44158225819935 110.963789389501 2.12522376245828 NA NA NA NA NA NA
"164" "ÖvreBjörntjärn" 2013 197 78.989050002978 0 114.12193151626 0 171.355547615247 0 NA NA NA NA NA NA
"165" "ÖvreBjörntjärn" 2013 198 63.6031356606682 0 99.2027396377245 0 132.179608440886 0 NA NA NA NA NA NA
"166" "ÖvreBjörntjärn" 2013 199 58.9775856594237 0 88.6393057653149 0 124.685508337789 0 NA NA NA NA NA NA
"167" "ÖvreBjörntjärn" 2013 200 46.7833478512974 0 72.4323042358536 0 94.4183106239372 0 NA NA NA NA NA NA
"168" "ÖvreBjörntjärn" 2013 201 50.773723058979 0 79.8647923027785 0 105.605013961782 0 NA NA NA NA NA NA
"169" "ÖvreBjörntjärn" 2013 202 56.7393960936211 0 87.3012710140176 0 118.909383440802 0 NA NA NA NA NA NA
"170" "ÖvreBjörntjärn" 2013 203 54.2243370773745 0 83.9277680748552 0 114.993488898649 0 57.8142165734987 0 88.3483884716072 0 112.358452995041 0
"171" "ÖvreBjörntjärn" 2013 204 47.2580277670718 0 71.7423089168027 0 97.955085318509 0 NA NA NA NA NA NA
"172" "ÖvreBjörntjärn" 2013 205 37.8249962737042 0 56.2798956124486 0 72.7356188050644 0 NA NA NA NA NA NA
"173" "ÖvreBjörntjärn" 2013 206 33.0255698673736 0 47.2776171271464 0 67.3030440339503 0 NA NA NA NA NA NA
"174" "ÖvreBjörntjärn" 2013 207 30.2754184439328 0 43.4230634036256 0 62.7960162220431 0 NA NA NA NA NA NA
"175" "ÖvreBjörntjärn" 2013 208 32.1177001110422 0 46.0744590157902 0 74.479694100753 0 NA NA NA NA NA NA
"176" "ÖvreBjörntjärn" 2013 209 30.1165852906527 0 43.5029378576433 0 68.7044933770202 0 NA NA NA NA NA NA
"177" "ÖvreBjörntjärn" 2013 210 32.3757945139964 0 49.9576551058986 0 78.6645124182963 0 NA NA NA NA NA NA
"178" "ÖvreBjörntjärn" 2013 211 28.3907711985165 0 41.3972889630563 0 52.5968354141888 0 NA NA NA NA NA NA
"179" "ÖvreBjörntjärn" 2013 212 42.362938628454 0 65.3900642645451 0 91.1461429170381 0 NA NA NA NA NA NA
"180" "ÖvreBjörntjärn" 2013 213 31.1913278758861 0 47.023386805844 0 57.549862865256 0 NA NA NA NA NA NA
"181" "ÖvreBjörntjärn" 2013 214 32.3657895325505 0 49.3516174383953 0 66.4601147000514 0 NA NA NA NA NA NA
"182" "ÖvreBjörntjärn" 2013 215 36.9288884857878 0 54.6419381903648 0 83.5576801697351 0 NA NA NA NA NA NA
"183" "ÖvreBjörntjärn" 2013 216 33.554415515961 0 51.8793234086031 0 71.8670751318062 0 NA NA NA NA NA NA
"184" "ÖvreBjörntjärn" 2013 217 33.4996383020934 0 50.756837839681 0 79.6985053943584 0 31.7412585668689 0 49.7006346895024 0 55.0984779765371 0
"185" "ÖvreBjörntjärn" 2013 218 37.8896455407469 0 56.8755646481 0 92.0000499114959 0 NA NA NA NA NA NA
"186" "ÖvreBjörntjärn" 2013 219 34.3814162238863 0 53.5551766211778 0 68.9607685521349 0 NA NA NA NA NA NA
"187" "ÖvreBjörntjärn" 2013 220 41.3965507283018 0 64.8671422065391 0 90.4059411937435 0 NA NA NA NA NA NA
"188" "ÖvreBjörntjärn" 2013 221 41.1071858810867 0 63.4180793910152 0 88.8770851207223 0 NA NA NA NA NA NA
"189" "ÖvreBjörntjärn" 2013 222 33.3870269270267 2.16722944534249 48.0826451029507 3.13285057551999 59.0819180586392 3.79152089112805 NA NA NA NA NA NA
"190" "ÖvreBjörntjärn" 2013 223 33.153934382754 2.24210092160806 47.2734374674176 3.23919444551122 62.4923217303428 4.05657622846565 NA NA NA NA NA NA
"191" "ÖvreBjörntjärn" 2013 224 32.8569424362953 2.17508076773211 48.2104070180683 3.18601882086455 68.6996547177576 4.59874473972538 NA NA NA NA NA NA
"192" "ÖvreBjörntjärn" 2013 225 32.4240813126176 2.30154832309404 47.49033236794 3.35275556184286 68.8997409093756 5.0655292620255 NA NA NA NA NA NA
"193" "ÖvreBjörntjärn" 2013 226 37.0025228173556 3.22031115301598 56.168399492423 4.88298564909659 76.4004734672996 6.67285755821768 NA NA NA NA NA NA
"194" "ÖvreBjörntjärn" 2013 227 46.723620016699 3.0665821369502 72.3282480329485 4.75811035580072 99.915309989417 6.54434058595842 NA NA NA NA NA NA
"195" "ÖvreBjörntjärn" 2013 228 39.6313922223192 2.48504738387476 59.3461617901419 3.71866363886704 82.2172699376404 5.13194536189206 NA NA NA NA NA NA
"196" "ÖvreBjörntjärn" 2013 229 44.9779327287785 3.53968455511898 68.9341723041046 5.4151037804217 93.69590005032 7.47390225957097 NA NA NA NA NA NA
"197" "ÖvreBjörntjärn" 2013 230 43.8190014174459 3.32794040995833 63.6868555162593 4.8370727789957 93.1062749942631 7.06467166192528 NA NA NA NA NA NA
"198" "ÖvreBjörntjärn" 2013 231 42.3461236480425 3.23798879411234 66.0666345767769 5.04503404060215 87.4871354837019 6.68753659310031 46.6065193983974 0 72.0798762361574 0 88.7061363848115 0
"199" "ÖvreBjörntjärn" 2013 232 39.1319192042949 2.85539007926156 57.7479918622232 4.1998613202519 83.2091534512539 6.04548082630837 NA NA NA NA NA NA
"200" "ÖvreBjörntjärn" 2013 233 39.2249162195701 0 56.2676324393276 0 85.7898663750492 0 NA NA NA NA NA NA
"201" "ÖvreBjörntjärn" 2013 234 41.4314681474116 0 62.4162458166482 0 87.3873776372203 0 NA NA NA NA NA NA
"202" "ÖvreBjörntjärn" 2013 235 36.4498312376227 0 48.8621916676662 0 58.4226766207055 0 NA NA NA NA NA NA
"203" "ÖvreBjörntjärn" 2013 236 37.07202506307 0 49.2328543932045 0 69.2216204090832 0 NA NA NA NA NA NA
"204" "ÖvreBjörntjärn" 2013 237 37.1376892660878 0 51.5462279974915 0 70.2108022986359 0 NA NA NA NA NA NA
"205" "ÖvreBjörntjärn" 2013 238 34.3998842457368 0 47.1589552075612 0 64.4484337312887 0 NA NA NA NA NA NA
"206" "ÖvreBjörntjärn" 2013 239 31.579786065212 0 42.5119562236735 0 58.8405539326856 0 NA NA NA NA NA NA
"207" "ÖvreBjörntjärn" 2013 240 36.2608211978204 0 50.9781875114433 0 75.3082481768425 0 NA NA NA NA NA NA
"208" "ÖvreBjörntjärn" 2013 241 38.8394568401187 0.246048121630314 53.3606105760766 0.370231983666903 73.1396936589339 0.363085772959182 NA NA NA NA NA NA
"209" "ÖvreBjörntjärn" 2013 242 40.0193999882888 0 52.004629811511 0 69.9233028476199 0 NA NA NA NA NA NA
"210" "ÖvreBjörntjärn" 2013 243 42.9785236498263 0 59.4763032912097 0 83.3502820283179 0 NA NA NA NA NA NA
"211" "ÖvreBjörntjärn" 2013 244 41.6851861750477 0 59.4087235333888 0 80.401846170127 0 NA NA NA NA NA NA
"212" "ÖvreBjörntjärn" 2013 245 38.3973600706831 0 54.2205243244346 0 63.7349397119813 0 41.733083546215 0 65.4836013511412 0 57.5661773291465 0
"213" "ÖvreBjörntjärn" 2013 246 33.9739328051549 0 44.1655057859385 0 52.4734042685491 0 NA NA NA NA NA NA
"214" "ÖvreBjörntjärn" 2013 247 34.0680024385345 0 45.2456121158856 0 56.5528045225453 0 NA NA NA NA NA NA
"215" "ÖvreBjörntjärn" 2013 248 34.9156657754776 0 48.095962708706 0 57.4459534102009 0 NA NA NA NA NA NA
"216" "ÖvreBjörntjärn" 2013 249 34.6597363835463 0 48.7269381232138 0 60.1090171028042 0 NA NA NA NA NA NA
"217" "ÖvreBjörntjärn" 2013 250 32.0825735377006 0 41.8129284528915 0 48.5040675350637 0 NA NA NA NA NA NA
"218" "ÖvreBjörntjärn" 2013 251 30.8638639860277 0 39.7938901567443 0 50.2127999699884 0 NA NA NA NA NA NA
"219" "ÖvreBjörntjärn" 2013 252 31.5292887179593 0 44.1632065582538 0 62.550252285539 0 NA NA NA NA NA NA
"220" "ÖvreBjörntjärn" 2013 253 29.2296399110704 0 37.0530562881145 0 50.7565859207443 0 NA NA NA NA NA NA
"221" "ÖvreBjörntjärn" 2013 254 29.9004091008439 0 38.0891711682431 0 47.2092972710087 0 NA NA NA NA NA NA
"222" "ÖvreBjörntjärn" 2013 255 31.5632899296215 0 39.1421795243914 0 53.8854940943807 0 NA NA NA NA NA NA
"223" "ÖvreBjörntjärn" 2013 256 34.0475529964344 0 47.1937426298226 0 60.6924986790116 0 NA NA NA NA NA NA
"224" "ÖvreBjörntjärn" 2013 257 40.3195267392489 0 57.0557423710293 0 75.7778512380749 0 NA NA NA NA NA NA
"225" "ÖvreBjörntjärn" 2013 258 57.2329284018109 0 86.0465117639772 0 117.352928213795 0 NA NA NA NA NA NA
"226" "ÖvreBjörntjärn" 2013 259 73.0340013353438 0 112.394127403256 0 158.114318690622 0 91.8281271878685 0 131.502163039248 0 185.842971288822 0
"227" "ÖvreBjörntjärn" 2013 260 62.3727263754463 0 98.8845453577108 0 129.6835563835 0 NA NA NA NA NA NA
"228" "ÖvreBjörntjärn" 2013 261 64.9092686902839 0 102.003238973233 0 135.237787162823 0 NA NA NA NA NA NA
"229" "ÖvreBjörntjärn" 2013 262 62.1325962970077 0 98.0749906995409 0 126.805557308922 0 NA NA NA NA NA NA
"230" "ÖvreBjörntjärn" 2013 263 46.6205416522734 0 72.89399366482 0 83.0897917077833 0 NA NA NA NA NA NA
"231" "ÖvreBjörntjärn" 2013 264 53.5680083556176 0 83.1826254397492 0 110.263976820227 0 NA NA NA NA NA NA
"232" "ÖvreBjörntjärn" 2013 265 93.7456228316589 0 142.066818472896 0 216.737774491423 0 NA NA NA NA NA NA
"233" "ÖvreBjörntjärn" 2013 266 94.1088963522576 0 146.108267349229 0 214.219604506296 0 NA NA NA NA NA NA
"234" "ÖvreBjörntjärn" 2013 267 97.6224748463058 0 153.140240508778 0 230.778348107459 0 NA NA NA NA NA NA
"235" "ÖvreBjörntjärn" 2013 268 99.0113830352156 0 154.587795358138 0 229.030719490099 0 NA NA NA NA NA NA
"236" "ÖvreBjörntjärn" 2013 269 107.853854954304 0 166.490399150345 0 253.067852166482 0 NA NA NA NA NA NA
"237" "ÖvreBjörntjärn" 2013 270 102.034072835052 0 157.013620485815 0 224.060628983577 0 NA NA NA NA NA NA
"238" "ÖvreBjörntjärn" 2013 271 70.798223167275 0 110.446213017074 0 134.34441816499 0 NA NA NA NA NA NA
"239" "ÖvreBjörntjärn" 2013 272 61.03459551268 0 84.3775035676838 0 98.9870140805198 0 NA NA NA NA NA NA
"240" "ÖvreBjörntjärn" 2013 273 62.6727513246499 0 86.7800651566405 0 104.303523677093 0 64.9974080595659 0 98.0780796111177 0 60.8142979252007 0
"243" "ÖvreBjörntjärn" 2014 152 56.0880402293247 17.2720796991474 82.2201450966228 24.0076382470304 105.492143902881 59.0005437461068 NA NA NA NA NA NA
"244" "ÖvreBjörntjärn" 2014 153 57.254945192733 16.6115994146787 82.3227153503192 22.0210526197145 110.603998348145 53.4295260847368 NA NA NA NA NA NA
"245" "ÖvreBjörntjärn" 2014 154 47.4113205087258 9.4238750593498 68.6097023103631 15.8390235506195 84.0646254549997 36.8762587024786 NA NA NA NA NA NA
"246" "ÖvreBjörntjärn" 2014 155 41.0518748324868 7.52014258056438 58.8910236418491 13.2368664668871 69.4640611702187 29.8926176092054 NA NA NA NA NA NA
"247" "ÖvreBjörntjärn" 2014 156 40.2096118864003 7.24818714377803 57.7790572034419 12.6613917253706 61.2745259485655 29.446427106499 NA NA NA NA NA NA
"248" "ÖvreBjörntjärn" 2014 157 43.9363904442457 10.7526702382308 63.2983804349926 15.9236403336954 82.6853940395561 37.5797661568599 NA NA NA NA NA NA
"249" "ÖvreBjörntjärn" 2014 158 37.8483036427019 5.4480398747649 54.5170996558935 11.0448037286993 61.431764290817 24.9073834834637 NA NA NA NA NA NA
"250" "ÖvreBjörntjärn" 2014 159 35.3418913857416 4.60755242349883 50.8853215848489 10.1938400376434 52.5327231191531 22.323423701431 NA NA NA NA NA NA
"251" "ÖvreBjörntjärn" 2014 160 34.8145837187739 3.89556515649789 49.5501565943762 9.13529574310759 51.9279040663949 19.1805651735807 NA NA NA NA NA NA
"252" "ÖvreBjörntjärn" 2014 161 36.6024706119104 4.20369554759268 52.5460999282144 10.0694775837856 52.8124033691662 21.565328802823 NA NA NA NA NA NA
"253" "ÖvreBjörntjärn" 2014 162 54.4195007177587 16.5390128917738 77.9922100722548 21.4718774732782 110.313536809645 52.322576538547 NA NA NA NA NA NA
"254" "ÖvreBjörntjärn" 2014 163 56.8720135197696 16.2317338333806 81.2969198687677 22.3461582665406 106.795779763255 54.3340282991744 37.7879607119287 5.38644062372013 56.0175096967394 11.6878170660563 45.7329156670902 28.60591443915
"255" "ÖvreBjörntjärn" 2014 164 71.1576326200494 24.423980573349 99.2463394627976 28.5631300789059 151.440297643839 70.9512353315002 NA NA NA NA NA NA
"256" "ÖvreBjörntjärn" 2014 165 65.6859549576423 18.8164852662846 94.4162294065667 25.4409779458679 134.463905166734 61.1208940907801 NA NA NA NA NA NA
"257" "ÖvreBjörntjärn" 2014 166 65.8530438423958 19.8593745075618 93.5901689631326 25.9466525706201 134.797938416195 62.9977606650488 NA NA NA NA NA NA
"258" "ÖvreBjörntjärn" 2014 167 82.1736257031093 32.9484564360806 112.087556077556 34.8249679400489 184.101604001204 86.7978429808599 NA NA NA NA NA NA
"259" "ÖvreBjörntjärn" 2014 168 69.1294584984129 23.2061929338323 100.602338802158 29.5674728151673 151.28906458712 71.9661261446528 NA NA NA NA NA NA
"260" "ÖvreBjörntjärn" 2014 169 83.0968938377271 33.1489126353288 114.942594391371 35.463650870664 179.805998493938 88.655393013415 NA NA NA NA NA NA
"261" "ÖvreBjörntjärn" 2014 170 59.9977875796079 15.4488852159226 88.1118209146324 23.7035942783399 112.675686654937 54.8145200181469 NA NA NA NA NA NA
"262" "ÖvreBjörntjärn" 2014 171 62.5982988132275 18.2176407922086 89.4474254783249 24.7839573114756 127.36976715555 59.3629042859672 NA NA NA NA NA NA
"263" "ÖvreBjörntjärn" 2014 172 54.6504570882449 12.339091000119 80.2159713958696 20.6289499640323 104.899935277356 46.9496440482124 NA NA NA NA NA NA
"264" "ÖvreBjörntjärn" 2014 173 50.840082890452 10.5976285550735 73.9474220885049 17.7993229606355 97.308216500101 40.4534473189377 NA NA NA NA NA NA
"265" "ÖvreBjörntjärn" 2014 174 57.9891229955866 17.9967634112643 82.8094900351095 23.5462667856784 119.826326057213 56.6213069929585 NA NA NA NA NA NA
"266" "ÖvreBjörntjärn" 2014 175 52.8332528615508 14.4567760556067 77.0565964099691 20.9123945469176 105.804716233951 49.5306147103898 NA NA NA NA NA NA
"267" "ÖvreBjörntjärn" 2014 176 50.506797168742 12.9416354087504 72.6956793331523 18.8414039057545 100.201585791537 45.0609750337304 NA NA NA NA NA NA
"268" "ÖvreBjörntjärn" 2014 177 46.3491575158591 9.89611807251904 67.2915466467651 16.0692811599653 90.8882986380078 37.1029048394276 29.8274598498353 3.7839853306452 44.0382163335453 8.79689833994771 33.8169657089489 21.8485921539724
"269" "ÖvreBjörntjärn" 2014 178 42.7244022909221 8.26187559675861 61.7568934724547 14.6013827409454 83.2259103481009 33.3752050628232 NA NA NA NA NA NA
"270" "ÖvreBjörntjärn" 2014 179 44.0501508987985 9.92255134222745 63.5585413344621 15.6805723271464 88.2773825275182 36.1928946322395 NA NA NA NA NA NA
"271" "ÖvreBjörntjärn" 2014 180 40.7168992512304 9.70645436475104 58.7198588436692 14.8105841829824 81.5948765336125 35.3726503728613 NA NA NA NA NA NA
"272" "ÖvreBjörntjärn" 2014 181 36.1314244391253 6.82711301606751 52.6451958868003 12.1598724916369 69.0845086772863 27.5305100682104 NA NA NA NA NA NA
"273" "ÖvreBjörntjärn" 2014 182 32.8790023813363 5.76761434073447 47.1150220831148 10.3744593577679 59.1634299375239 23.4073498462157 NA NA NA NA NA NA
"274" "ÖvreBjörntjärn" 2014 183 35.2021104047063 8.29143438454212 49.5745364122091 11.6875284260034 71.1638161226458 27.4041231455528 NA NA NA NA NA NA
"275" "ÖvreBjörntjärn" 2014 184 34.6821673822063 7.69800820706364 51.3861909126972 13.1840404425865 67.0620623324112 30.0548489937695 NA NA NA NA NA NA
"276" "ÖvreBjörntjärn" 2014 185 33.9846043326434 7.39123664709566 49.7293246819356 11.8719177912963 64.0273922932441 27.8917144637978 NA NA NA NA NA NA
"277" "ÖvreBjörntjärn" 2014 186 44.2733413114517 15.4853223824438 60.4230963100834 17.0285911343092 95.8027606009946 42.1742965608881 NA NA NA NA NA NA
"278" "ÖvreBjörntjärn" 2014 187 38.5574509592676 12.8197687445454 53.8365009055142 15.365337322253 81.1115411281784 37.2487944620434 NA NA NA NA NA NA
"279" "ÖvreBjörntjärn" 2014 188 31.2771455911293 6.8736074044768 44.6792449081417 10.46124746744 62.4861703016224 24.5082861377318 NA NA NA NA NA NA
"280" "ÖvreBjörntjärn" 2014 189 26.8142082821997 3.26357605947192 38.5597746394259 7.32937575654034 48.1967129482224 15.7561747716889 NA NA NA NA NA NA
"281" "ÖvreBjörntjärn" 2014 190 24.884902489492 3.37660861783076 35.7740923773287 7.24625528054289 42.5053258967383 16.5214768786066 NA NA NA NA NA NA
"282" "ÖvreBjörntjärn" 2014 191 28.1824316292105 5.021800345072 40.5342545338865 9.01552010433663 53.667671874105 20.5716867792999 23.552402624129 1.54975542217966 32.7589490193889 4.89579731660518 17.2095095976073 11.4845008013653
"283" "ÖvreBjörntjärn" 2014 192 30.2899793895979 5.92706891327315 43.5382407647214 9.65311517327302 61.6245892118967 22.1890889408163 NA NA NA NA NA NA
"284" "ÖvreBjörntjärn" 2014 193 33.9814004130494 8.34920625459292 49.1408504450628 12.2530279703819 71.2776387044921 28.8844535461077 NA NA NA NA NA NA
"285" "ÖvreBjörntjärn" 2014 194 31.6944310310001 5.40241052310546 45.5758241952988 9.7933242948346 60.5449857767567 22.6698905160782 NA NA NA NA NA NA
"286" "ÖvreBjörntjärn" 2014 195 33.0293413269238 6.90389240400846 48.2956734180083 11.6918742714201 62.9131492177444 26.8767424655573 NA NA NA NA NA NA
"287" "ÖvreBjörntjärn" 2014 196 35.3768871286291 5.76567994992077 50.8398243908827 11.0363451574031 63.7507936282263 23.5195353310805 NA NA NA NA NA NA
"288" "ÖvreBjörntjärn" 2014 197 35.1636020954449 5.90098585771522 51.0066892733439 11.473130034687 62.5912717555495 25.3888719540839 NA NA NA NA NA NA
"289" "ÖvreBjörntjärn" 2014 198 33.1243661500931 4.83986780309858 47.4087300151087 10.0056300516163 54.8192778818338 22.4687437379545 NA NA NA NA NA NA
"290" "ÖvreBjörntjärn" 2014 199 29.2729550617428 3.20025014766602 41.5996533848756 7.426541346724 50.945898731183 15.7328174232727 NA NA NA NA NA NA
"291" "ÖvreBjörntjärn" 2014 200 29.8939576489451 3.56044286860277 42.5043826418771 7.80404044457531 53.4930145269106 16.2044233046701 NA NA NA NA NA NA
"292" "ÖvreBjörntjärn" 2014 201 30.454694840945 4.26529900529529 43.3582993216804 8.63867837735829 51.8965982980125 19.1691559550583 NA NA NA NA NA NA
"293" "ÖvreBjörntjärn" 2014 202 26.6445186765637 0.971625127663928 36.7433214251961 2.82231511135071 40.046248517108 5.70375258488252 NA NA NA NA NA NA
"294" "ÖvreBjörntjärn" 2014 203 28.0296817205458 0 39.4378354558001 0 52.4755045620693 0.826165083708099 NA NA NA NA NA NA
"295" "ÖvreBjörntjärn" 2014 204 33.9564247042216 0 46.1961308345528 0 69.3186024915581 1.66208497686072 NA NA NA NA NA NA
"296" "ÖvreBjörntjärn" 2014 205 28.5028702706084 0 37.7092458465772 0 44.1391255829312 2.96843436466946 NA NA NA NA NA NA
"297" "ÖvreBjörntjärn" 2014 206 28.1218144915762 0 38.8451120201568 0 46.5658207770515 1.92998184492849 28.4492771792984 0 41.7642161311042 0 26.2061932997798 0.416065477653375
"298" "ÖvreBjörntjärn" 2014 207 33.1908899663763 0 47.3634822151732 0 69.9219718530132 1.97351329128801 NA NA NA NA NA NA
"299" "ÖvreBjörntjärn" 2014 208 31.3479509607033 0 42.834494754978 0 53.7270160935031 0.767729744112552 NA NA NA NA NA NA
"300" "ÖvreBjörntjärn" 2014 209 34.6315404186896 0 48.0460356888334 0 64.9768830383887 0.828668755697221 NA NA NA NA NA NA
"301" "ÖvreBjörntjärn" 2014 210 39.750219786016 0 57.0761852008552 0 67.6995555007155 1.3040114891741 NA NA NA NA NA NA
"302" "ÖvreBjörntjärn" 2014 211 45.6265368665048 0 67.3326706404581 0 98.0715001456409 1.04240398812237 NA NA NA NA NA NA
"303" "ÖvreBjörntjärn" 2014 212 51.5100329201155 0 70.6848943766894 0 105.893711104006 1.32264117128769 NA NA NA NA NA NA
"304" "ÖvreBjörntjärn" 2014 213 36.1822577253075 0 49.6652045455909 0 66.5340070210703 0.687537378518555 NA NA NA NA NA NA
"305" "ÖvreBjörntjärn" 2014 214 42.738812606787 0 62.3051831849029 0 82.0318265250234 0.669473375624011 NA NA NA NA NA NA
"306" "ÖvreBjörntjärn" 2014 215 39.3205594998427 0 56.0149474789142 0 77.4449228467041 0.729591837557771 NA NA NA NA NA NA
"307" "ÖvreBjörntjärn" 2014 216 35.8758899595286 0 52.7566637588872 0 68.332840855512 0.861870344655675 NA NA NA NA NA NA
"308" "ÖvreBjörntjärn" 2014 217 33.1495485591025 0 48.2165566785189 0 64.405171594106 0.984848596423614 NA NA NA NA NA NA
"309" "ÖvreBjörntjärn" 2014 218 31.4923749128261 0 44.0540043471243 0 65.4586190523212 0.882709131305023 NA NA NA NA NA NA
"310" "ÖvreBjörntjärn" 2014 219 28.5093801902334 0 37.7783171355496 0 51.3238228336508 0.591831397800359 24.1904185920846 0 36.5919178361847 0 25.95245471093 0.0631245674394908
"311" "ÖvreBjörntjärn" 2014 220 27.8134408897243 0 36.4412188280959 0 44.4691131400557 0.691996650105475 NA NA NA NA NA NA
"312" "ÖvreBjörntjärn" 2014 221 26.9787686405676 0 35.9913150720649 0 43.1125425585025 0.593798181465453 NA NA NA NA NA NA
"313" "ÖvreBjörntjärn" 2014 222 28.4885844526963 0 37.2075294192422 0 48.8304773440346 0.701858074894429 NA NA NA NA NA NA
"314" "ÖvreBjörntjärn" 2014 223 30.7005731188183 0 41.9879038622511 0 56.2076168242559 0.719036957606381 NA NA NA NA NA NA
"315" "ÖvreBjörntjärn" 2014 224 37.0089551650778 0 52.5227029454097 0 82.3339980522163 0.917770228144594 NA NA NA NA NA NA
"316" "ÖvreBjörntjärn" 2014 225 40.31979568626 0 57.6321418273592 0 88.8509270219809 0.725817159666557 NA NA NA NA NA NA
"317" "ÖvreBjörntjärn" 2014 226 37.4738270505829 0 52.3470618682027 0 75.8109501227956 0.567210523381004 NA NA NA NA NA NA
"318" "ÖvreBjörntjärn" 2014 227 42.1065001321587 0 59.1536100291101 0 91.9020039095679 0.934143419537426 NA NA NA NA NA NA
"319" "ÖvreBjörntjärn" 2014 228 42.3559299315798 0 59.1883680836518 0 83.9464558816568 1.01297992688489 NA NA NA NA NA NA
"320" "ÖvreBjörntjärn" 2014 229 45.2075217771939 0 61.1386934500922 0 85.658055523789 0.811612554054974 NA NA NA NA NA NA
"321" "ÖvreBjörntjärn" 2014 230 43.8188603401377 0 61.1057649766205 0 89.8706824698346 1.10960484748421 NA NA NA NA NA NA
"322" "ÖvreBjörntjärn" 2014 231 37.7328820395835 0 47.2990465756207 0 55.7603137528798 0.734597826095607 NA NA NA NA NA NA
"323" "ÖvreBjörntjärn" 2014 232 36.8370656218062 0 46.6049289118011 0 54.0313698015671 0.824517667341647 NA NA NA NA NA NA
"324" "ÖvreBjörntjärn" 2014 233 32.9794157940797 0 41.8018668157216 0 50.4212711634911 0.776204320128616 29.3274053357122 0 39.775511610202 0 15.9530263370139 0.289133571727366
"325" "ÖvreBjörntjärn" 2014 234 30.4500060440613 0 37.3758056971492 0 44.6703176366126 0.672059472191935 NA NA NA NA NA NA
"326" "ÖvreBjörntjärn" 2014 235 32.5265806183656 0 42.4370468569577 0 53.462818969235 0.674339219469828 NA NA NA NA NA NA
"327" "ÖvreBjörntjärn" 2014 236 35.3932862898311 0 44.0822908969364 0 57.4899918773608 1.30796417662632 NA NA NA NA NA NA
"328" "ÖvreBjörntjärn" 2014 237 46.6247083609899 0 57.8249871559319 0 64.8386208493207 0.951560646929852 NA NA NA NA NA NA
"329" "ÖvreBjörntjärn" 2014 238 64.6811156866164 0 94.8256118402478 0 120.721307171461 1.35362546227138 NA NA NA NA NA NA
"330" "ÖvreBjörntjärn" 2014 239 102.76809041782 0 158.09610068972 0 224.751069692606 1.49117957788715 NA NA NA NA NA NA
"331" "ÖvreBjörntjärn" 2014 240 84.9034109024707 0 126.581027074496 0 149.050186859423 1.86724307737555 NA NA NA NA NA NA
"332" "ÖvreBjörntjärn" 2014 241 75.4634829488939 0 99.8660637672566 0 106.635919628654 1.54484517333265 NA NA NA NA NA NA
"333" "ÖvreBjörntjärn" 2014 242 78.9299440326051 0 103.619528360258 0 133.825525879279 1.52389668170937 NA NA NA NA NA NA
"334" "ÖvreBjörntjärn" 2014 243 77.2316075316593 0 101.326319230005 0 143.870769622339 0.838660902883881 NA NA NA NA NA NA
"335" "ÖvreBjörntjärn" 2014 244 94.3426622465149 0 131.291135274088 0 201.916324651118 1.99894920516904 NA NA NA NA NA NA
"336" "ÖvreBjörntjärn" 2014 245 90.2154040990833 0 126.789293665499 0 191.357338581411 1.43623588442248 NA NA NA NA NA NA
"337" "ÖvreBjörntjärn" 2014 246 131.10253319066 0 175.392337991435 0 299.697249322233 1.48727643202607 NA NA NA NA NA NA
"338" "ÖvreBjörntjärn" 2014 247 103.212330615264 0 137.87968806982 0 228.931385393838 1.11085058506313 85.520532614938 0 135.51694812769 0 152.588597239397 0.371393287213764
"339" "ÖvreBjörntjärn" 2014 248 77.5450901929191 0 109.663531712272 0 138.940178152605 1.51600219596837 NA NA NA NA NA NA
"340" "ÖvreBjörntjärn" 2014 249 66.115924416485 0 86.3894474552419 0 108.234240303379 0.920103439742458 NA NA NA NA NA NA
"341" "ÖvreBjörntjärn" 2014 250 67.5310849664501 0 91.6566755891217 0 126.130777647737 0.641893604328455 NA NA NA NA NA NA
"342" "ÖvreBjörntjärn" 2014 251 65.5162388146814 0 89.0988074865052 0 110.181281098847 1.42403528470006 NA NA NA NA NA NA
"343" "ÖvreBjörntjärn" 2014 252 61.4760139107121 0 74.695619191681 0 83.8765118317188 0.951915026738219 NA NA NA NA NA NA
"344" "ÖvreBjörntjärn" 2014 253 76.0847167632043 0 109.078064555752 0 147.634192455454 1.26909752652976 NA NA NA NA NA NA
"345" "ÖvreBjörntjärn" 2014 254 107.454961079037 0 144.222230411193 0 248.522172159093 0.943636717731466 NA NA NA NA NA NA
"346" "ÖvreBjörntjärn" 2014 255 67.5900665508945 0 96.858461659178 0 120.932420468763 1.66984973131974 NA NA NA NA NA NA
"347" "ÖvreBjörntjärn" 2014 256 71.1274264824342 0 97.5337325022654 0 148.099804146638 0.930167338481525 NA NA NA NA NA NA
"348" "ÖvreBjörntjärn" 2014 257 88.4722363372075 0 123.66213048408 0 193.132405506743 0.844074514917492 NA NA NA NA NA NA
"349" "ÖvreBjörntjärn" 2014 258 66.3349812999027 0 85.9770322921402 0 120.450012545621 1.04226934686731 NA NA NA NA NA NA
"350" "ÖvreBjörntjärn" 2014 259 67.4913073867477 0 88.6340656575338 0 123.086627940873 0.76447234519891 NA NA NA NA NA NA
"351" "ÖvreBjörntjärn" 2014 260 70.6317133582431 0 99.0089391001793 0 133.540376838967 1.03619946616805 65.7276945695362 0 99.1520708859825 0 72.1217363745318 0.106628874725341
"352" "ÖvreBjörntjärn" 2014 261 63.1688872450482 0 79.0975198345835 0 102.028207477611 0.627130487012996 NA NA NA NA NA NA
"353" "ÖvreBjörntjärn" 2014 262 73.2834720694095 0 102.893490499262 0 151.254335058287 1.24190658019628 NA NA NA NA NA NA
"354" "ÖvreBjörntjärn" 2014 263 71.1359048166323 0 100.395948238885 0 141.489517957892 1.18622424032625 NA NA NA NA NA NA
"355" "ÖvreBjörntjärn" 2014 264 75.0456638305228 0 109.094982950178 0 162.098332679516 1.10036168259998 NA NA NA NA NA NA
"356" "ÖvreBjörntjärn" 2014 265 72.1582801961446 0 98.5805141594951 0 156.155084117603 1.22078849709413 NA NA NA NA NA NA
"357" "ÖvreBjörntjärn" 2014 266 80.7547808338944 0 109.209011469488 0 187.07429923971 1.01184976989057 NA NA NA NA NA NA
"358" "ÖvreBjörntjärn" 2014 267 84.0956740872618 0 117.112267631834 0 188.999498313669 1.04527210631228 NA NA NA NA NA NA
"359" "ÖvreBjörntjärn" 2014 268 109.109029426827 0 140.73309281519 0 266.896399368928 1.17585122733465 NA NA NA NA NA NA
"360" "ÖvreBjörntjärn" 2014 269 86.069195688602 0 125.418416373648 0 178.952702905119 1.16191244547903 NA NA NA NA NA NA
"361" "ÖvreBjörntjärn" 2014 270 288.377827238378 0 294.550884276906 0 611.074711285877 0.926714104412145 NA NA NA NA NA NA
"362" "ÖvreBjörntjärn" 2014 271 123.267224981016 0 156.129539647688 0 271.76095414016 0.709648255544156 NA NA NA NA NA NA
"363" "ÖvreBjörntjärn" 2014 272 163.773431766451 0 179.322832818816 0 352.609518865473 0.618929959712387 NA NA NA NA NA NA
"364" "ÖvreBjörntjärn" 2014 273 48.7444002394876 0.184135075969647 71.2209231886164 0.267450978878034 96.0148223610753 0.784298410832036 NA NA NA NA NA NA
"367" "ÖvreBjörntjärn" 2015 152 56.7795898402169 0 83.0339870133095 0 116.469134964374 0 NA NA NA NA NA NA
"368" "ÖvreBjörntjärn" 2015 153 82.0100494289616 0 113.998513988262 0 193.759393721435 0 NA NA NA NA NA NA
"369" "ÖvreBjörntjärn" 2015 154 43.1832082306227 0 62.9497192473448 0 76.3848576096221 0 NA NA NA NA NA NA
"370" "ÖvreBjörntjärn" 2015 155 103.530863606618 0 125.666973908711 0 237.452203243932 0 NA NA NA NA NA NA
"371" "ÖvreBjörntjärn" 2015 156 95.1717678432464 0 115.751060941736 0 216.525856547735 0 NA NA NA NA NA NA
"372" "ÖvreBjörntjärn" 2015 157 38.8195384913697 0 53.7873227810783 0 65.7797727686415 0 NA NA NA NA NA NA
"373" "ÖvreBjörntjärn" 2015 158 70.9790705629221 0 98.5901551580622 0 165.30933388305 0 NA NA NA NA NA NA
"374" "ÖvreBjörntjärn" 2015 159 52.0001034181836 0 78.3031499084709 0 118.041889508108 0 NA NA NA NA NA NA
"375" "ÖvreBjörntjärn" 2015 160 81.5729683283693 0 104.995708786804 0 192.774274335892 0 NA NA NA NA NA NA
"376" "ÖvreBjörntjärn" 2015 161 121.003257107018 0 135.988973457165 0 269.766459462502 0 52.2264631842205 0 80.0823351196436 0 113.322016432188 0
"377" "ÖvreBjörntjärn" 2015 162 109.695941583298 0 127.091298300189 0 251.412714186443 0 NA NA NA NA NA NA
"378" "ÖvreBjörntjärn" 2015 163 78.2331335203572 0 96.6118869552911 0 180.351262146824 0 NA NA NA NA NA NA
"379" "ÖvreBjörntjärn" 2015 164 65.0452179490738 0 83.7342514323472 0 146.556360113431 0 NA NA NA NA NA NA
"380" "ÖvreBjörntjärn" 2015 165 33.2790309876647 0 45.3955100571158 0 54.1236309663954 0 NA NA NA NA NA NA
"381" "ÖvreBjörntjärn" 2015 166 71.164955875572 0 90.3513175920721 0 164.990134306733 0 NA NA NA NA NA NA
"382" "ÖvreBjörntjärn" 2015 167 74.2693283680991 0 99.0506617638762 0 185.493255971075 0 NA NA NA NA NA NA
"383" "ÖvreBjörntjärn" 2015 168 35.8736241226148 0 53.6692693969155 0 66.6212516639446 0 NA NA NA NA NA NA
"384" "ÖvreBjörntjärn" 2015 169 34.8933391285782 0 50.6421440050966 0 59.670410779753 0 NA NA NA NA NA NA
"385" "ÖvreBjörntjärn" 2015 170 33.431202132072 0 47.7723908372026 0 53.4967012260923 0 NA NA NA NA NA NA
"386" "ÖvreBjörntjärn" 2015 171 32.5013790774424 0 45.4952894657944 0 50.4569296566198 0 NA NA NA NA NA NA
"387" "ÖvreBjörntjärn" 2015 172 31.4819158691317 0 44.8047731733993 0 49.7502921061774 0 NA NA NA NA NA NA
"388" "ÖvreBjörntjärn" 2015 173 29.6208029234388 0 42.3874760035302 0 51.0405182562495 0 NA NA NA NA NA NA
"389" "ÖvreBjörntjärn" 2015 174 27.8143079135896 0 39.3210894587802 0 41.3828928050747 0 NA NA NA NA NA NA
"390" "ÖvreBjörntjärn" 2015 175 28.4858755524505 0 39.3732735312732 0 47.5779240149865 0 23.0588173839647 0 34.0435390759324 0 22.1278112526849 0
"391" "ÖvreBjörntjärn" 2015 176 52.5770942690979 0 73.1782095690911 0 129.112054335512 0 NA NA NA NA NA NA
"392" "ÖvreBjörntjärn" 2015 177 29.1420755348768 0 43.7531214964176 0 49.717406022658 0 NA NA NA NA NA NA
"393" "ÖvreBjörntjärn" 2015 178 26.1175860929897 0 36.7481210977139 0 36.7624363398009 0 NA NA NA NA NA NA
"394" "ÖvreBjörntjärn" 2015 179 40.9808980238123 0 56.3357727429355 0 89.0905108330925 0 NA NA NA NA NA NA
"395" "ÖvreBjörntjärn" 2015 180 25.4856287944486 0 35.1332523817857 0 40.4248402018726 0 NA NA NA NA NA NA
"396" "ÖvreBjörntjärn" 2015 181 23.6241890961793 0 31.5809719485965 0 32.5249842356242 0 NA NA NA NA NA NA
"397" "ÖvreBjörntjärn" 2015 182 30.8443258519591 0 45.9550944310617 0 62.0889929693448 0 NA NA NA NA NA NA
"398" "ÖvreBjörntjärn" 2015 183 36.5850794355751 0 52.5870227908131 0 74.5494753962684 0 NA NA NA NA NA NA
"399" "ÖvreBjörntjärn" 2015 184 29.7266987678333 0 41.9617210982713 0 50.6838171194196 0 NA NA NA NA NA NA
"400" "ÖvreBjörntjärn" 2015 185 45.5584056474401 0 66.1481041753209 0 110.023402639334 0 NA NA NA NA NA NA
"401" "ÖvreBjörntjärn" 2015 186 28.0227687440051 0 39.2020560558184 0 43.4540057920671 0 NA NA NA NA NA NA
"402" "ÖvreBjörntjärn" 2015 187 32.5378419718348 0 46.0391805712154 0 65.6495442138695 0 NA NA NA NA NA NA
"403" "ÖvreBjörntjärn" 2015 188 28.9678518247831 0 39.2512916395792 0 39.9480357952076 0 24.9814623309153 0 31.9371899085344 0 10.4783481615245 0
"404" "ÖvreBjörntjärn" 2015 189 29.1764716087557 0 39.4850924490026 0 39.1477823026661 0 NA NA NA NA NA NA
"405" "ÖvreBjörntjärn" 2015 190 26.8107566982485 0 37.1786450777193 0 42.4422454290567 0 NA NA NA NA NA NA
"406" "ÖvreBjörntjärn" 2015 191 27.4654830997135 0 36.4309504195329 0 32.0616028556593 0 NA NA NA NA NA NA
"407" "ÖvreBjörntjärn" 2015 192 34.2696779640882 0 49.0492429221757 0 50.3794525932031 0 NA NA NA NA NA NA
"408" "ÖvreBjörntjärn" 2015 193 32.7910480419975 0 41.9193627255021 0 35.6200565345209 0 NA NA NA NA NA NA
"409" "ÖvreBjörntjärn" 2015 194 37.8843919938433 0 54.8454910154402 0 61.4019113653238 0 NA NA NA NA NA NA
"410" "ÖvreBjörntjärn" 2015 195 36.079916188676 0 51.7529026677947 0 55.7219644350465 0 NA NA NA NA NA NA
"411" "ÖvreBjörntjärn" 2015 196 35.6586860030355 0 49.6814710820198 0 53.8584979965558 0 NA NA NA NA NA NA
"412" "ÖvreBjörntjärn" 2015 197 33.2826646997343 0 44.8152460338839 0 44.0388355298989 0 NA NA NA NA NA NA
"413" "ÖvreBjörntjärn" 2015 198 51.7236452296128 0 78.053815925094 0 112.31460594702 0 NA NA NA NA NA NA
"414" "ÖvreBjörntjärn" 2015 199 43.698119246882 0 62.6169682169995 0 83.6824039861587 0 NA NA NA NA NA NA
"415" "ÖvreBjörntjärn" 2015 200 55.6434236393443 0 78.4369109604078 0 116.21493205057 0 NA NA NA NA NA NA
"416" "ÖvreBjörntjärn" 2015 201 64.3368695076939 0 92.0360618647366 0 147.748235138196 0 NA NA NA NA NA NA
"417" "ÖvreBjörntjärn" 2015 202 46.7411588220272 0 68.6258370327573 0 87.0485278620754 0 NA NA NA NA NA NA
"418" "ÖvreBjörntjärn" 2015 203 42.9131966137528 0 58.7825410745537 0 73.6637660880597 0 NA NA NA NA NA NA
"419" "ÖvreBjörntjärn" 2015 204 37.0113640850672 0 48.8610096308844 0 59.5670874996336 0 36.7108472939822 0 52.2780332711476 0 29.8581932732544 0
"420" "ÖvreBjörntjärn" 2015 205 34.551362781878 0 47.8065980822253 0 55.4888790536204 0 NA NA NA NA NA NA
"421" "ÖvreBjörntjärn" 2015 206 47.7492801656585 0 65.2473959668043 0 102.533514882617 0 NA NA NA NA NA NA
"422" "ÖvreBjörntjärn" 2015 207 40.8932594846069 0 57.7693821158755 0 81.5753056419313 0 NA NA NA NA NA NA
"423" "ÖvreBjörntjärn" 2015 208 39.0167078347259 0 57.1019218431523 0 58.9956584085956 0 NA NA NA NA NA NA
"424" "ÖvreBjörntjärn" 2015 209 42.2296005419996 0 58.1674832984225 0 65.44426977376 0 NA NA NA NA NA NA
"425" "ÖvreBjörntjärn" 2015 210 42.3955407824285 0 55.9047878145217 0 55.6618908434193 0 NA NA NA NA NA NA
"426" "ÖvreBjörntjärn" 2015 211 46.7825074875717 0 68.4112919613192 0 86.4938981967744 0 NA NA NA NA NA NA
"427" "ÖvreBjörntjärn" 2015 212 45.7456420579206 0 62.6424682606842 0 75.8441589741203 0 NA NA NA NA NA NA
"428" "ÖvreBjörntjärn" 2015 213 60.4750735981095 0 93.1528727782798 0 135.525456508632 0 NA NA NA NA NA NA
"429" "ÖvreBjörntjärn" 2015 214 57.3574629290611 0 85.5167627592934 0 116.244961013113 0 NA NA NA NA NA NA
"430" "ÖvreBjörntjärn" 2015 215 54.448941730896 0 79.4690027380399 0 112.01232831942 0 NA NA NA NA NA NA
"431" "ÖvreBjörntjärn" 2015 216 48.8149337319674 0 70.2120882052858 0 80.9467915978113 0 46.0036751792231 0 69.5662294084812 0 54.4999312222099 0
"432" "ÖvreBjörntjärn" 2015 217 48.825671331726 0 70.1217422483995 0 87.5144461829238 0 NA NA NA NA NA NA
"433" "ÖvreBjörntjärn" 2015 218 44.0073112819881 0 59.4029888156362 0 49.8580753756574 0 NA NA NA NA NA NA
"434" "ÖvreBjörntjärn" 2015 219 53.605251556145 0 77.000322886772 0 95.1638210461468 0 NA NA NA NA NA NA
"435" "ÖvreBjörntjärn" 2015 220 51.4230744432776 0 73.0246909824169 0 91.4430488114633 0 NA NA NA NA NA NA
"436" "ÖvreBjörntjärn" 2015 221 48.5159729414174 0 66.5285247919155 0 71.8082657299104 0 NA NA NA NA NA NA
"437" "ÖvreBjörntjärn" 2015 222 50.9459148717144 0 70.9652896936529 0 84.2225855182391 0 NA NA NA NA NA NA
"438" "ÖvreBjörntjärn" 2015 223 49.4249331199615 0 69.7913618090141 0 75.2767895937582 0 NA NA NA NA NA NA
"439" "ÖvreBjörntjärn" 2015 224 80.9062034755664 0 117.445806778074 0 184.726146607751 0 NA NA NA NA NA NA
"440" "ÖvreBjörntjärn" 2015 225 99.2330339682445 0 140.336772543248 0 238.477987957436 0 NA NA NA NA NA NA
"441" "ÖvreBjörntjärn" 2015 226 64.9292906381391 0 97.0534988931506 0 128.879489111805 0 NA NA NA NA NA NA
"442" "ÖvreBjörntjärn" 2015 227 51.5826061971263 0 70.0986629018525 0 84.6808300615387 0 NA NA NA NA NA NA
"443" "ÖvreBjörntjärn" 2015 228 51.7347579881426 0 69.8078919005297 0 82.6786344398505 0 NA NA NA NA NA NA
"444" "ÖvreBjörntjärn" 2015 229 52.7444316136011 0 73.85255107145 0 96.8871708077519 0 NA NA NA NA NA NA
"445" "ÖvreBjörntjärn" 2015 230 52.4998111482417 0 74.414855457759 0 95.4654396652459 0 NA NA NA NA NA NA
"446" "ÖvreBjörntjärn" 2015 231 55.8768510467781 0 78.4232720381282 0 110.757967108047 0 51.8939800714051 0 81.5417773034448 0 73.236149378717 0
"447" "ÖvreBjörntjärn" 2015 232 51.8236814220071 0 75.4764711916798 0 99.7230686840214 0 NA NA NA NA NA NA
"448" "ÖvreBjörntjärn" 2015 233 49.1457837755924 0 69.8997183479262 0 97.8757943122184 0 39.3499806527814 0 53.9269919282786 0 21.172322848852 0
"449" "ÖvreBjörntjärn" 2015 234 45.5161858091111 0 65.3117560411553 0 90.761996603717 0 NA NA NA NA NA NA
"450" "ÖvreBjörntjärn" 2015 235 40.5322886082655 0 54.2126367202275 0 66.077824473538 0 NA NA NA NA NA NA
"451" "ÖvreBjörntjärn" 2015 236 39.1459561438983 0 52.6997097278972 0 64.4995475488464 0 NA NA NA NA NA NA
"452" "ÖvreBjörntjärn" 2015 237 37.6315061493967 0 50.3117660730184 0 60.9050155966544 0 NA NA NA NA NA NA
"453" "ÖvreBjörntjärn" 2015 238 38.8751769047601 0 53.2911598757541 0 69.331118572911 0 NA NA NA NA NA NA
"454" "ÖvreBjörntjärn" 2015 239 43.4888468284601 0 62.0953495132582 0 76.9037225498037 0 NA NA NA NA NA NA
"455" "ÖvreBjörntjärn" 2015 240 58.8024720039484 0 87.8705581356914 0 127.008513333535 0 NA NA NA NA NA NA
"456" "ÖvreBjörntjärn" 2015 241 91.9347496335444 0 124.867209871404 0 218.961619803764 0 NA NA NA NA NA NA
"457" "ÖvreBjörntjärn" 2015 242 55.9373606377505 0 77.8590804037709 0 111.391463742171 0 NA NA NA NA NA NA
"458" "ÖvreBjörntjärn" 2015 243 56.3622864127573 0 80.9971833207304 0 120.612871754572 0 NA NA NA NA NA NA
"459" "ÖvreBjörntjärn" 2015 244 47.220947390659 0 63.187109423959 0 80.2481927889054 0 47.0021875685447 0 63.7470664703158 0 25.5636312244948 0
"460" "ÖvreBjörntjärn" 2015 245 53.1457099157727 0 73.4439257732893 0 109.150069224488 0 NA NA NA NA NA NA
"461" "ÖvreBjörntjärn" 2015 246 50.2096967858544 0 65.3923392669206 0 85.6865386176676 0 NA NA NA NA NA NA
"462" "ÖvreBjörntjärn" 2015 247 54.7498420437668 0 76.0728215863089 0 109.681019868438 0 NA NA NA NA NA NA
"463" "ÖvreBjörntjärn" 2015 248 48.9018487364542 0 64.8855419871015 0 79.3366243563726 0 NA NA NA NA NA NA
"464" "ÖvreBjörntjärn" 2015 249 56.9161453111509 0 86.4912837726034 0 119.580483709122 0 NA NA NA NA NA NA
"465" "ÖvreBjörntjärn" 2015 250 70.6952348645961 0 107.663153685133 0 155.346341613577 0 NA NA NA NA NA NA
"466" "ÖvreBjörntjärn" 2015 251 71.6952794524739 0 109.124211837111 0 159.243929035429 0 NA NA NA NA NA NA
"467" "ÖvreBjörntjärn" 2015 252 61.6420499299703 0 86.9227805601169 0 113.944484619625 0 NA NA NA NA NA NA
"468" "ÖvreBjörntjärn" 2015 253 56.7128132476729 0 76.0996355086434 0 85.7318361461752 0 NA NA NA NA NA NA
"469" "ÖvreBjörntjärn" 2015 254 55.9010843063369 0 74.3525233491921 0 81.5307830753081 0 NA NA NA NA NA NA
"470" "ÖvreBjörntjärn" 2015 255 55.5023195099657 0 77.9726516593976 0 81.0221815430704 0 NA NA NA NA NA NA
"471" "ÖvreBjörntjärn" 2015 256 51.1652272830068 0 69.5692943484749 0 69.6826206663439 0 NA NA NA NA NA NA
"472" "ÖvreBjörntjärn" 2015 257 49.8011861683056 0 69.1486963164059 0 66.7311189413905 0 45.7486192345627 0 66.9914296306817 0 39.3825797984494 0
"473" "ÖvreBjörntjärn" 2015 258 50.6307964971514 0 72.1241166795092 0 87.5007618692518 0 NA NA NA NA NA NA
"474" "ÖvreBjörntjärn" 2015 259 44.444709786239 0 62.2947170391366 0 65.9707785027674 0 NA NA NA NA NA NA
"475" "ÖvreBjörntjärn" 2015 260 43.0632520886102 0 60.6014897435431 0 68.712292512091 0 NA NA NA NA NA NA
"476" "ÖvreBjörntjärn" 2015 261 37.1924313793363 0 49.277204304935 0 44.1622086761244 0 NA NA NA NA NA NA
"477" "ÖvreBjörntjärn" 2015 262 132.465208451068 0 162.619347512308 0 308.754724401584 0 NA NA NA NA NA NA
"478" "ÖvreBjörntjärn" 2015 263 62.3029642554501 0 86.4809279372733 0 122.859367697657 0 NA NA NA NA NA NA
"479" "ÖvreBjörntjärn" 2015 264 45.9191600580465 0 60.6805544706924 0 71.5806962398112 0 NA NA NA NA NA NA
"480" "ÖvreBjörntjärn" 2015 265 44.7276267159175 0 58.2833231525806 0 60.5760497853062 0 NA NA NA NA NA NA
"481" "ÖvreBjörntjärn" 2015 266 46.5098830686069 0 62.8590455521586 0 79.4171871838585 0 NA NA NA NA NA NA
"482" "ÖvreBjörntjärn" 2015 267 49.7556790773824 0 69.7111912630061 0 88.2029581514026 0 NA NA NA NA NA NA
"483" "ÖvreBjörntjärn" 2015 268 56.9729159766474 0 81.1175983649314 0 120.731871005909 0 NA NA NA NA NA NA
"484" "ÖvreBjörntjärn" 2015 269 90.4496498655752 0 123.59186249658 0 224.731120032377 0 NA NA NA NA NA NA
"485" "ÖvreBjörntjärn" 2015 270 82.2302092607357 0 120.46842760886 0 188.829848716252 0 NA NA NA NA NA NA
"486" "ÖvreBjörntjärn" 2015 271 53.3658530054532 0 72.612114533211 0 101.409976067253 0 53.0633631046029 0 74.250290501571 0 33.3899214029268 0
"487" "ÖvreBjörntjärn" 2015 272 59.5358411683892 0 84.971924291349 0 129.450150766108 0 NA NA NA NA NA NA
"488" "ÖvreBjörntjärn" 2015 273 119.457039227546 0 157.226138148953 0 284.119714907455 0 NA NA NA NA NA NA
"492" "Lillsjölidtjärnen" 2012 153 47.3568941004765 0 62.2822771918672 0 61.4742164969126 0 NA NA NA NA NA NA
"493" "Lillsjölidtjärnen" 2012 154 49.4920237504351 0 67.3147006356984 0 91.7246134397466 0 NA NA NA NA NA NA
"494" "Lillsjölidtjärnen" 2012 155 37.9634581282458 0 50.7521118999058 0 44.1240250209545 0 NA NA NA NA NA NA
"495" "Lillsjölidtjärnen" 2012 156 33.9817324991399 0 44.4923368523055 0 43.8235382109141 0 NA NA NA NA NA NA
"496" "Lillsjölidtjärnen" 2012 157 31.561598550494 0 41.0999988680584 0 36.1970958397933 0 NA NA NA NA NA NA
"497" "Lillsjölidtjärnen" 2012 158 29.4216543409339 0 37.459824977577 0 34.7468501073087 0 NA NA NA NA NA NA
"498" "Lillsjölidtjärnen" 2012 159 30.7556619572298 0 40.6033711931038 0 40.4988403383308 0 NA NA NA NA NA NA
"499" "Lillsjölidtjärnen" 2012 160 29.800705277364 0 38.0447934181374 0 34.9513738750306 0 NA NA NA NA NA NA
"500" "Lillsjölidtjärnen" 2012 161 31.6495585997817 0 41.0392936548488 0 43.5704028564277 0 NA NA NA NA NA NA
"501" "Lillsjölidtjärnen" 2012 162 33.2467332847643 0 41.8798890198542 0 35.2391423538529 0 NA NA NA NA NA NA
"502" "Lillsjölidtjärnen" 2012 163 33.7606381844236 0.441831305550125 42.3586003745442 1.25528255820127 28.6108285726447 4.02580993751607 36.7087488243841 0 46.6623982027215 0 16.130484265581 0
"503" "Lillsjölidtjärnen" 2012 164 33.7791056971942 1.74013869336526 44.1925802984263 3.91784278410869 36.3356310456332 12.0420977503298 NA NA NA NA NA NA
"504" "Lillsjölidtjärnen" 2012 165 32.700313120195 1.93795221279313 43.3128548976252 4.29272428921546 42.8978949315196 13.1011210170198 NA NA NA NA NA NA
"505" "Lillsjölidtjärnen" 2012 166 33.8135834313163 2.07923132845569 44.3628631615138 4.31626900043088 44.5512017708296 13.7011906312695 NA NA NA NA NA NA
"506" "Lillsjölidtjärnen" 2012 167 43.8307703509646 3.01267580192409 58.2081685437529 6.27643920179975 62.7809610297662 19.6348233306708 NA NA NA NA NA NA
"507" "Lillsjölidtjärnen" 2012 168 43.9160921192125 3.1944301325005 58.1429705894758 6.25154930594439 65.6018043029479 20.1361980042742 NA NA NA NA NA NA
"508" "Lillsjölidtjärnen" 2012 169 39.9870678730651 1.28267778441191 51.7034439631186 3.75531448237427 47.9034109922378 10.5130468570123 NA NA NA NA NA NA
"509" "Lillsjölidtjärnen" 2012 170 45.8135287855792 3.56926143574035 60.7698801232929 6.94492750544596 62.1388774651886 22.5902568513574 NA NA NA NA NA NA
"510" "Lillsjölidtjärnen" 2012 171 37.4398264692065 1.52782918988699 48.8970934458301 3.91433953619346 49.6403170135134 11.30120952721 NA NA NA NA NA NA
"511" "Lillsjölidtjärnen" 2012 172 51.4244943116365 5.60901229174671 69.0185966568437 9.06064622302538 80.4963069246808 28.4382855783085 NA NA NA NA NA NA
"512" "Lillsjölidtjärnen" 2012 173 46.6414212823941 4.8004383563627 62.6866319449289 8.14009424574229 74.8261185397977 25.9938406659635 NA NA NA NA NA NA
"513" "Lillsjölidtjärnen" 2012 174 40.0125140404197 2.61980407765845 53.0881095524486 5.59475332637312 60.6646221596769 17.9615083793859 NA NA NA NA NA NA
"514" "Lillsjölidtjärnen" 2012 175 33.3533487448188 2.21131607152987 44.0837259045431 4.67673504631357 51.0068112816782 14.6027969957498 NA NA NA NA NA NA
"515" "Lillsjölidtjärnen" 2012 176 31.9605808693741 1.63447920722451 42.0331665108741 3.80232684606828 47.5226204573862 11.9497870890827 NA NA NA NA NA NA
"516" "Lillsjölidtjärnen" 2012 177 36.9290012689549 1.72490124606223 48.1916326038645 4.23289275781457 50.5365985308345 13.8065844394458 33.6924421750001 1.97318437472546 44.498997806625 4.41639608450523 28.0813953150912 16.264582366973
"517" "Lillsjölidtjärnen" 2012 178 36.5099052309802 1.90031367806831 48.0011736772825 4.49391448996695 51.364983497141 13.6751289179793 NA NA NA NA NA NA
"518" "Lillsjölidtjärnen" 2012 179 46.0529105564674 3.89234606165509 61.2657994020789 7.23604675324616 69.7428358348618 23.0780261190591 NA NA NA NA NA NA
"519" "Lillsjölidtjärnen" 2012 180 42.8000816080924 2.49269554970259 56.6276945021199 5.57370811826432 62.6074095301161 15.9818655838888 NA NA NA NA NA NA
"520" "Lillsjölidtjärnen" 2012 181 41.1881849438283 2.88293309582829 54.5016975903903 5.61073896809056 58.9082871806278 18.3502697769119 NA NA NA NA NA NA
"521" "Lillsjölidtjärnen" 2012 182 37.116705857349 3.27319464476226 49.5434562329077 5.7488231695655 56.5320498138866 18.5691692796182 NA NA NA NA NA NA
"522" "Lillsjölidtjärnen" 2012 183 33.6591613777429 1.78802250635523 44.0158698366261 4.01382277483352 39.7809554387755 13.3817901582944 NA NA NA NA NA NA
"523" "Lillsjölidtjärnen" 2012 184 26.4655048814776 1.87902717975804 35.0467130256747 3.6851530732658 37.4306382108295 12.4110207540233 NA NA NA NA NA NA
"524" "Lillsjölidtjärnen" 2012 185 30.6521621143588 2.1950201312469 40.810299681169 4.33914943781526 44.9213518625347 13.7548415494819 NA NA NA NA NA NA
"525" "Lillsjölidtjärnen" 2012 186 31.4761259566028 1.65774430785224 41.3507166873765 3.83426290173984 45.390979004571 11.5439272890144 NA NA NA NA NA NA
"526" "Lillsjölidtjärnen" 2012 187 30.4978298341353 1.71477753619578 40.0830891408397 3.79503522246296 44.1805444740352 12.0241565672284 NA NA NA NA NA NA
"527" "Lillsjölidtjärnen" 2012 188 30.0231878978835 1.85340581453894 39.4774763710596 3.83342067641451 42.1522299458755 13.1487357389461 NA NA NA NA NA NA
"528" "Lillsjölidtjärnen" 2012 189 26.6827384419234 0.854497980006312 34.5386428402287 2.44133126077717 37.7045439074029 8.98064415334266 NA NA NA NA NA NA
"529" "Lillsjölidtjärnen" 2012 190 34.3194936308581 1.34193908621422 44.4192044640214 3.52469889949343 46.1556510221913 13.0059696625011 NA NA NA NA NA NA
"530" "Lillsjölidtjärnen" 2012 191 40.7273808250838 2.55050464302524 53.7744988239011 5.43525239281887 53.5531464651524 17.2233231618125 51.5278616138699 5.38223021769795 68.3198381905258 8.53704426949518 47.5164891205778 31.3513771150704
"531" "Lillsjölidtjärnen" 2012 192 49.4818116176261 5.01343115924286 66.4419388722494 8.73346254371679 84.406555996376 26.8163380248555 NA NA NA NA NA NA
"532" "Lillsjölidtjärnen" 2012 193 47.2630411660825 2.06678699221143 61.3245808087188 5.03966376023219 56.4591019876283 15.64211315971 NA NA NA NA NA NA
"533" "Lillsjölidtjärnen" 2012 194 44.6548154917738 1.86722454611293 58.0781281155689 4.55680215788704 58.8935120213259 16.0915694290698 NA NA NA NA NA NA
"534" "Lillsjölidtjärnen" 2012 195 38.1530567424085 1.32591970971532 49.3965748659521 3.7439042628808 48.8557899981455 11.8279746004007 NA NA NA NA NA NA
"535" "Lillsjölidtjärnen" 2012 196 39.7222424468458 1.61726488573658 51.3864903835769 4.01627463097673 51.499575160794 12.0136638429369 NA NA NA NA NA NA
"536" "Lillsjölidtjärnen" 2012 197 34.2124491931664 1.05217855087423 44.2209919147818 3.02655049291078 43.7678651598003 9.58186767581985 NA NA NA NA NA NA
"537" "Lillsjölidtjärnen" 2012 198 43.6108178256732 3.17532767010572 57.5499892313611 6.23713111365922 66.0300871780976 19.6832373665481 NA NA NA NA NA NA
"538" "Lillsjölidtjärnen" 2012 199 44.5444457744479 3.41975329243526 59.2343863168702 6.55115480779098 71.6466333469222 19.4276546043337 NA NA NA NA NA NA
"539" "Lillsjölidtjärnen" 2012 200 41.9287825443441 2.54473712734252 55.3662182483949 5.65284044355573 66.3394957454347 17.4792851663304 NA NA NA NA NA NA
"540" "Lillsjölidtjärnen" 2012 201 38.6945360273024 1.40939445554994 50.3529247705654 3.91837673937141 56.1755275408541 11.6885341658858 NA NA NA NA NA NA
"541" "Lillsjölidtjärnen" 2012 202 38.1175169282126 2.30680287422498 50.3220223921886 4.96852625512563 61.2110984057397 14.8540079780399 NA NA NA NA NA NA
"542" "Lillsjölidtjärnen" 2012 203 43.9055496924775 3.94765922578158 58.6240226041089 7.05392973668213 79.5327491330191 20.8409019655617 NA NA NA NA NA NA
"543" "Lillsjölidtjärnen" 2012 204 42.3768124369454 2.31503161628326 55.7515744267286 5.1939202994914 68.7124051330629 15.5837999097272 NA NA NA NA NA NA
"544" "Lillsjölidtjärnen" 2012 205 37.0431049407444 2.12332819419729 48.6656968092263 4.67973734604541 55.5453940947892 14.3356716624244 41.3997529003496 4.49130154070532 55.3700147764965 7.98144949286832 41.8930623982413 28.9935460312196
"545" "Lillsjölidtjärnen" 2012 206 30.8853398307008 1.09814896490964 40.0350090675057 2.9710064349114 46.9283977262778 9.8767128568895 NA NA NA NA NA NA
"546" "Lillsjölidtjärnen" 2012 207 26.4868642177906 0.987854563049356 34.3657595077747 2.58675079712791 42.8784034926465 7.66574717040063 NA NA NA NA NA NA
"547" "Lillsjölidtjärnen" 2012 208 32.9779936430502 1.97686726106145 43.5059519722809 4.29244023978279 53.8919691021637 12.4819643051959 NA NA NA NA NA NA
"548" "Lillsjölidtjärnen" 2012 209 32.1909336257997 1.25775761837908 41.7525770301785 3.28666966465609 49.8628744636291 10.3622030881386 NA NA NA NA NA NA
"549" "Lillsjölidtjärnen" 2012 210 29.6659362605704 1.79874815829043 38.927450384656 3.74218973496255 46.9608042653333 12.0628254083808 NA NA NA NA NA NA
"550" "Lillsjölidtjärnen" 2012 211 27.1983906082352 1.09242365698403 35.580553426534 2.88355036932912 35.5075206690646 9.30470122840032 NA NA NA NA NA NA
"551" "Lillsjölidtjärnen" 2012 212 31.3887509130069 0.760979286653767 40.3688133559622 1.8442229926806 42.0418368917905 5.866210170151 NA NA NA NA NA NA
"552" "Lillsjölidtjärnen" 2012 213 34.2617999667125 0 43.2758423625558 0 53.4708756584958 0 NA NA NA NA NA NA
"553" "Lillsjölidtjärnen" 2012 214 30.7678605316515 0 37.7586824311571 0 43.141861152785 0 NA NA NA NA NA NA
"554" "Lillsjölidtjärnen" 2012 215 38.7889515840455 0 49.340344229128 0 58.3231514788314 0 NA NA NA NA NA NA
"555" "Lillsjölidtjärnen" 2012 216 36.2253425568866 0 43.9383501846185 0 45.253740333115 0 NA NA NA NA NA NA
"556" "Lillsjölidtjärnen" 2012 217 34.3597755643247 0 41.675759449372 0 41.0560350490387 0 NA NA NA NA NA NA
"557" "Lillsjölidtjärnen" 2012 218 26.6949397942278 0 33.1824248104392 0 35.4717959411695 0 NA NA NA NA NA NA
"558" "Lillsjölidtjärnen" 2012 219 26.4945528923772 0.271508765586769 33.1327915328003 0.374024177101318 38.7913021475842 0.334168905124702 36.8637675131107 0 49.7737305099359 0 31.8753084756178 0
"559" "Lillsjölidtjärnen" 2012 220 37.0052362010398 0 45.5779293140359 0 51.8741215441152 0 NA NA NA NA NA NA
"560" "Lillsjölidtjärnen" 2012 221 48.4922016416769 1.5580347548668 62.9789497778228 1.9337592507453 81.0105494611318 3.21905020643133 NA NA NA NA NA NA
"561" "Lillsjölidtjärnen" 2012 222 43.1191988971102 1.63656373963438 53.4714180572758 1.98443236061947 63.036573970841 3.58429381777077 NA NA NA NA NA NA
"562" "Lillsjölidtjärnen" 2012 223 42.576236760017 2.02945166657084 51.9415031873947 2.46083269714627 59.3034342819291 4.28091440354768 NA NA NA NA NA NA
"563" "Lillsjölidtjärnen" 2012 224 41.1077523851076 0 51.001751257399 0 53.3425454157496 0 NA NA NA NA NA NA
"564" "Lillsjölidtjärnen" 2012 225 38.4201226750281 0 47.1005854157187 0 44.8439913999554 0.0144426090818697 NA NA NA NA NA NA
"565" "Lillsjölidtjärnen" 2012 226 37.1426067582846 0 47.3124790388056 0 54.2558602215044 1.00351947822048e-05 NA NA NA NA NA NA
"566" "Lillsjölidtjärnen" 2012 227 37.462980050843 0 46.1706495511942 0 49.6226476169243 0 NA NA NA NA NA NA
"567" "Lillsjölidtjärnen" 2012 228 34.0007204021584 0 41.9712466837278 0 44.390891589398 0.0494071682750057 NA NA NA NA NA NA
"568" "Lillsjölidtjärnen" 2012 229 33.4621172757803 0.355607564184482 41.6320840754383 0.456372736314097 43.2571394727454 0.201960275314124 NA NA NA NA NA NA
"569" "Lillsjölidtjärnen" 2012 230 28.5620521145904 0 35.1041043149491 0 39.3321319269676 0.0114285574813537 NA NA NA NA NA NA
"570" "Lillsjölidtjärnen" 2012 231 31.5572282791636 0 38.561082147062 0 40.5194599658595 0.0372149929261729 NA NA NA NA NA NA
"571" "Lillsjölidtjärnen" 2012 232 34.7583777987119 0 42.7029669589288 0 48.8253451247452 0 NA NA NA NA NA NA
"572" "Lillsjölidtjärnen" 2012 233 46.4219962901345 4.63410022520676 60.1519956638347 5.95405557667301 87.1959633164874 8.71772958557943 71.7448323086916 0 99.3747912656296 0 114.373162361468 0
"573" "Lillsjölidtjärnen" 2012 234 50.6076246048108 2.92825062300132 64.7079677244904 3.57122946634412 79.9292661765747 5.59825451948728 NA NA NA NA NA NA
"574" "Lillsjölidtjärnen" 2012 235 49.4123797263067 3.63886103305616 62.5858350963955 4.43253195956575 73.5591472964323 7.12072490459385 NA NA NA NA NA NA
"575" "Lillsjölidtjärnen" 2012 236 47.0676598486926 1.75491911485409 57.816043627811 2.12794540013708 67.236254195071 3.90756359357841 NA NA NA NA NA NA
"576" "Lillsjölidtjärnen" 2012 237 41.8038703868096 0 51.0977136009149 0 59.9021307020584 0 NA NA NA NA NA NA
"577" "Lillsjölidtjärnen" 2012 238 47.4408275719412 0 60.0659864938906 0 74.9794271182171 0 NA NA NA NA NA NA
"578" "Lillsjölidtjärnen" 2012 239 49.8441952822545 1.58412495130769 64.4225419625561 1.93983073515529 83.7185130724369 3.38950462766198 NA NA NA NA NA NA
"579" "Lillsjölidtjärnen" 2012 240 57.2770515232439 2.11928383176494 76.2927899185698 2.82094814920937 129.430234906444 4.81183325240637 NA NA NA NA NA NA
"580" "Lillsjölidtjärnen" 2012 241 45.7508999817377 3.37812882032884 58.6580513834766 4.33283517981346 65.8770187088844 4.65710288206853 NA NA NA NA NA NA
"581" "Lillsjölidtjärnen" 2012 242 50.1244387919707 3.98660627490603 67.7284517795651 5.39124926763976 77.4444096595396 6.17317417059051 NA NA NA NA NA NA
"582" "Lillsjölidtjärnen" 2012 243 51.0043199203496 3.929717055585 69.0976327018051 5.31813674343933 78.0660004106722 6.01911788375435 NA NA NA NA NA NA
"583" "Lillsjölidtjärnen" 2012 244 51.2661256215554 1.98875046706133 68.6208172018765 2.73180337506545 75.3707027069163 3.8763981114221 NA NA NA NA NA NA
"584" "Lillsjölidtjärnen" 2012 245 48.4549803862461 1.94463540644658 61.2835333045153 2.48547373073161 62.6517168818949 2.79908955254544 NA NA NA NA NA NA
"585" "Lillsjölidtjärnen" 2012 246 56.169356731203 2.51513787228583 74.6633442573877 3.35671802127359 78.424660238496 3.68351236900362 NA NA NA NA NA NA
"586" "Lillsjölidtjärnen" 2012 247 54.0472578450173 2.56883726157344 67.647824918689 3.24421754803443 73.2354021367255 3.24379091445626 NA NA NA NA NA NA
"587" "Lillsjölidtjärnen" 2012 248 69.2836611113144 1.51724006711989 89.4196695876969 1.90906156074246 117.270161141086 2.97756747128615 82.2703181126793 0 111.157343193364 0 92.1918899453951 0
"588" "Lillsjölidtjärnen" 2012 249 83.472407314545 0 111.217639273057 0 153.278409700727 0.0140797973702055 NA NA NA NA NA NA
"589" "Lillsjölidtjärnen" 2012 250 86.4945982000995 0 116.952164139607 0 175.496448678212 0 NA NA NA NA NA NA
"590" "Lillsjölidtjärnen" 2012 251 74.4331242928353 0 91.2611720214367 0 103.357652829244 0 NA NA NA NA NA NA
"591" "Lillsjölidtjärnen" 2012 252 79.4562594126565 0 102.943611088171 0 134.250932928457 0 NA NA NA NA NA NA
"592" "Lillsjölidtjärnen" 2012 253 72.7705940707684 0 91.757136360872 0 99.3567404372161 0 NA NA NA NA NA NA
"593" "Lillsjölidtjärnen" 2012 254 74.6001776161725 0 99.5917181056286 0 108.511292722438 0.0835757331091189 NA NA NA NA NA NA
"594" "Lillsjölidtjärnen" 2012 255 73.5966869646664 0 100.467409587303 0 120.686200337111 0.192084201608647 NA NA NA NA NA NA
"595" "Lillsjölidtjärnen" 2012 256 55.0857066274626 0 72.5973179491658 0 78.3240382667312 0.0833138163628388 NA NA NA NA NA NA
"596" "Lillsjölidtjärnen" 2012 257 54.720090416198 0 68.2599222982649 0 84.6783994439072 0 NA NA NA NA NA NA
"597" "Lillsjölidtjärnen" 2012 258 72.4824260746784 0 99.0372668606724 0 140.994237178161 0 NA NA NA NA NA NA
"598" "Lillsjölidtjärnen" 2012 259 60.2228864238292 0 78.638659833616 0 89.227509439346 0.00749060732588817 61.3849868281678 0 84.912316969453 0 69.9570871785535 0
"599" "Lillsjölidtjärnen" 2012 260 57.4561418506231 0 72.3949057116963 0 73.179194875889 0.0505341999765056 NA NA NA NA NA NA
"600" "Lillsjölidtjärnen" 2012 261 54.517330273413 0 69.766090958677 0 78.4981658007018 0.00348955499607794 NA NA NA NA NA NA
"601" "Lillsjölidtjärnen" 2012 262 58.1334722988007 0 74.5129617080776 0 81.3842940790797 0.00366678400734262 NA NA NA NA NA NA
"602" "Lillsjölidtjärnen" 2012 263 54.8431492862789 0 68.3214992234499 0 66.7770000888089 0.000123325612409072 NA NA NA NA NA NA
"603" "Lillsjölidtjärnen" 2012 264 52.9324033844485 0 68.2098474187289 0 79.7708272410141 0 NA NA NA NA NA NA
"604" "Lillsjölidtjärnen" 2012 265 52.9621200579172 0 66.2590433335978 0 75.7790877703556 0.000920911902802147 NA NA NA NA NA NA
"605" "Lillsjölidtjärnen" 2012 266 58.0842209938804 0 70.8274079345483 0 78.8601523720836 0 NA NA NA NA NA NA
"606" "Lillsjölidtjärnen" 2012 267 56.7662045944226 0.0433328215657834 72.9762357326798 0.108302916280934 79.3054081887284 0.276061442674183 NA NA NA NA NA NA
"607" "Lillsjölidtjärnen" 2012 268 63.6647212742455 0 81.8408431148477 0 105.906159205757 0 NA NA NA NA NA NA
"608" "Lillsjölidtjärnen" 2012 269 61.6568624305388 0 76.9487267955837 0 78.7408096245692 0 NA NA NA NA NA NA
"609" "Lillsjölidtjärnen" 2012 270 64.6757634787911 0 78.4232687593071 0 79.2112249873248 0 NA NA NA NA NA NA
"610" "Lillsjölidtjärnen" 2012 271 59.8157679813495 0.013013864301364 72.5559688592858 0.0442434440833344 63.2943698635553 0.0513222056690544 NA NA NA NA NA NA
"611" "Lillsjölidtjärnen" 2012 272 62.8971685261893 0.0337759130492821 79.167549175953 0.0929076442497927 79.4555332954284 0.183854822141794 NA NA NA NA NA NA
"612" "Lillsjölidtjärnen" 2012 273 65.9357857934158 0 85.857284590811 0 89.2857703310095 0.0246243890277003 NA NA NA NA NA NA
"613" "Lillsjölidtjärnen" 2012 274 61.9264345000309 0 76.8975525082664 0 61.1588149589658 0.0573705771199717 NA NA NA NA NA NA
"615" "Lillsjölidtjärnen" 2013 152 40.1903233957937 0 52.2172047739796 0 68.2616653144733 0 NA NA NA NA NA NA
"616" "Lillsjölidtjärnen" 2013 153 41.9973004234026 0 53.7633842977725 0 51.4349625016792 0 NA NA NA NA NA NA
"617" "Lillsjölidtjärnen" 2013 154 58.2057740003723 0 77.7434682974199 0 102.067098570601 5.32185014511737e-06 43.9140494520011 0 60.4690214874235 0 50.3010920614395 0
"618" "Lillsjölidtjärnen" 2013 155 64.2819250421701 0 87.6985284283559 0 109.457556245512 0 NA NA NA NA NA NA
"619" "Lillsjölidtjärnen" 2013 156 50.2680841192737 0 65.2132391203375 0 51.0694932878175 0.0137647347078891 NA NA NA NA NA NA
"620" "Lillsjölidtjärnen" 2013 157 48.3210507697714 0 62.8047658498202 0 67.1395452417002 0.00663584129526951 NA NA NA NA NA NA
"621" "Lillsjölidtjärnen" 2013 158 35.6413904934937 0.428003398832848 45.4718444108328 0.774773926271949 40.3175379336701 2.15666268198354 NA NA NA NA NA NA
"622" "Lillsjölidtjärnen" 2013 159 36.2704300511105 2.99552132413276 48.2326512170415 5.56916493312714 55.5086252972392 16.6395106753742 NA NA NA NA NA NA
"623" "Lillsjölidtjärnen" 2013 160 36.8075352864042 2.05247370400082 48.3600858688455 4.63352508127033 51.8696534508606 12.6679231566865 NA NA NA NA NA NA
"624" "Lillsjölidtjärnen" 2013 161 35.8444594325393 2.936951325889 47.8008010676562 5.41060338443558 57.1896543113872 15.19922729935 NA NA NA NA NA NA
"625" "Lillsjölidtjärnen" 2013 162 32.0105280966601 2.18798213242597 42.3309723403629 4.37722205444824 46.4243729715829 12.4971694042339 NA NA NA NA NA NA
"626" "Lillsjölidtjärnen" 2013 163 31.3904643395995 2.06063447396415 41.0940123674394 4.00444963907744 47.7010900126531 12.1235287146488 NA NA NA NA NA NA
"627" "Lillsjölidtjärnen" 2013 164 31.753744692506 2.16488896494298 41.7035758895072 4.15738847074665 49.6382695794847 12.2064902440869 NA NA NA NA NA NA
"628" "Lillsjölidtjärnen" 2013 165 31.5978990224754 2.12591013941314 41.6072197103619 4.23690556732439 43.9863844006431 12.3246529347472 NA NA NA NA NA NA
"629" "Lillsjölidtjärnen" 2013 166 31.08967911727 2.9912042854948 41.5888021116121 5.19991430333802 44.8565701087939 15.7233013967244 NA NA NA NA NA NA
"630" "Lillsjölidtjärnen" 2013 167 30.6286016476085 1.96297573588808 40.4318432958411 3.91348319643872 47.016813409193 11.118174188973 NA NA NA NA NA NA
"631" "Lillsjölidtjärnen" 2013 168 30.177853084765 1.03716142704111 40.2118834846592 2.13740143944969 50.5992143653872 5.95305540105972 30.8478398015396 3.74113088074629 41.6754759865935 5.42096885668153 37.5223660964133 19.3222659228513
"632" "Lillsjölidtjärnen" 2013 169 28.3990837294992 0 37.6252827746317 0 49.8861759625622 0 NA NA NA NA NA NA
"633" "Lillsjölidtjärnen" 2013 170 25.2703835090267 0 32.978583812039 0 44.2388595503335 0 NA NA NA NA NA NA
"634" "Lillsjölidtjärnen" 2013 171 28.4462681761238 0 38.6910505691664 0 51.434935800526 0.000187047397474506 NA NA NA NA NA NA
"635" "Lillsjölidtjärnen" 2013 172 21.4361456464715 0 27.9332504911212 0 35.9010823247164 0.000239050670344365 NA NA NA NA NA NA
"636" "Lillsjölidtjärnen" 2013 173 24.8985099094699 0 32.9055420923964 0 42.1895929386086 0 NA NA NA NA NA NA
"637" "Lillsjölidtjärnen" 2013 174 20.6882372642443 0 28.2541226908853 0 32.9228199600918 0.000506919849532342 NA NA NA NA NA NA
"638" "Lillsjölidtjärnen" 2013 175 26.1204493234904 3.85892953360045 35.3451131364899 5.22306786122773 46.3169399470528 6.80188576727851 NA NA NA NA NA NA
"639" "Lillsjölidtjärnen" 2013 176 23.6624552884172 3.96631598325902 30.649522204878 5.1463774852725 32.0740046172808 5.34944766552171 NA NA NA NA NA NA
"640" "Lillsjölidtjärnen" 2013 177 26.2489135987604 4.23157376238815 34.3261923787256 5.52356003289321 32.9105860093891 5.44288899794752 NA NA NA NA NA NA
"641" "Lillsjölidtjärnen" 2013 178 26.6383540142221 3.8888604844837 33.1810239027284 4.8489269823765 29.4215015410354 4.34380287910156 NA NA NA NA NA NA
"642" "Lillsjölidtjärnen" 2013 179 29.8936016918541 3.95571334540245 39.0959045807033 5.16360140419914 46.9417894089615 6.1359054551876 NA NA NA NA NA NA
"643" "Lillsjölidtjärnen" 2013 180 28.5471896835783 3.7643470953309 37.6850543682544 4.98194052533069 39.80125073039 5.17225488760277 NA NA NA NA NA NA
"644" "Lillsjölidtjärnen" 2013 181 27.8245644714474 3.76227511585894 34.8812974431574 4.72781035372858 30.0808761331781 4.01972055485857 NA NA NA NA NA NA
"645" "Lillsjölidtjärnen" 2013 182 28.6156764443736 4.20688733571409 37.1305898893186 5.50369988562651 41.8802455145508 6.12695383475077 27.7497615073421 0 36.3979950290857 0 17.2698552854868 2.9793364799992e-05
"646" "Lillsjölidtjärnen" 2013 183 32.4066882726488 4.38263673017706 40.9714503148493 5.5390583684796 44.6256494104714 6.09795692260106 NA NA NA NA NA NA
"647" "Lillsjölidtjärnen" 2013 184 39.1946965801224 0 51.362373486086 0 66.4603282589572 0 NA NA NA NA NA NA
"648" "Lillsjölidtjärnen" 2013 185 47.1710135581123 0 60.8915456504971 0 59.6951485489585 0 NA NA NA NA NA NA
"649" "Lillsjölidtjärnen" 2013 186 49.6719291129865 1.38364905814772 65.4475742360243 1.81303033777718 61.786998971566 1.55209028938163 NA NA NA NA NA NA
"650" "Lillsjölidtjärnen" 2013 187 59.7443449817893 2.55392933309507 81.4425965084155 3.50743608729716 109.596550426221 4.88331745423301 NA NA NA NA NA NA
"651" "Lillsjölidtjärnen" 2013 188 53.8870525325552 1.51315122436741 71.390000732475 1.94516222541351 88.1616182084728 2.30473336108041 NA NA NA NA NA NA
"652" "Lillsjölidtjärnen" 2013 189 58.3039991342978 0.540501447225457 78.9876926790874 0.736331868778649 112.857165298968 1.04991221592853 NA NA NA NA NA NA
"653" "Lillsjölidtjärnen" 2013 190 46.4446659512711 0 59.3878304679986 0 58.2160989295606 0 NA NA NA NA NA NA
"654" "Lillsjölidtjärnen" 2013 191 53.7270309508993 0 72.4104825020705 0 95.6257250965726 0 NA NA NA NA NA NA
"655" "Lillsjölidtjärnen" 2013 192 49.3080786055853 0 66.5530233724358 0 85.4299562417336 0.00027731088345559 NA NA NA NA NA NA
"656" "Lillsjölidtjärnen" 2013 193 38.2691508903722 0 49.3418330638225 0 44.5536124006394 4.78976423649061e-05 NA NA NA NA NA NA
"657" "Lillsjölidtjärnen" 2013 194 30.7113880365961 0 39.2023970923491 0 38.5061725815299 3.70779228641706e-05 NA NA NA NA NA NA
"658" "Lillsjölidtjärnen" 2013 195 39.8791041896629 0 53.622734443543 0 61.0198824020947 0 NA NA NA NA NA NA
"659" "Lillsjölidtjärnen" 2013 196 34.0679469275056 0 43.4550937890717 0 48.6345295158051 0 35.4130670861012 0 46.9956971519481 0 23.936013803474 0
"660" "Lillsjölidtjärnen" 2013 197 58.9182098922976 0 78.542013010303 0 121.781799988103 0 NA NA NA NA NA NA
"661" "Lillsjölidtjärnen" 2013 198 50.3808045454935 0 68.4260194963681 0 82.4170956706397 0 NA NA NA NA NA NA
"662" "Lillsjölidtjärnen" 2013 199 41.512406742466 0 56.19560037457 0 75.1331283730495 0 NA NA NA NA NA NA
"663" "Lillsjölidtjärnen" 2013 200 42.5588836983639 0 58.6746391529857 0 85.1107158744508 0 NA NA NA NA NA NA
"664" "Lillsjölidtjärnen" 2013 201 38.9715886358393 0 53.2544833120766 0 59.9048184265224 0 NA NA NA NA NA NA
"665" "Lillsjölidtjärnen" 2013 202 53.2598799327726 0 72.4177989217671 0 111.8320704065 0 NA NA NA NA NA NA
"666" "Lillsjölidtjärnen" 2013 203 44.4032678843286 0 60.9886267170104 0 79.893503667609 0.0180411085984175 NA NA NA NA NA NA
"667" "Lillsjölidtjärnen" 2013 204 36.9548963043911 0 48.4017422442931 0 56.1586448377057 0.209675035298939 NA NA NA NA NA NA
"668" "Lillsjölidtjärnen" 2013 205 31.2632105215663 0 39.3332391078846 0 40.3450358123757 0.00196853560458459 NA NA NA NA NA NA
"669" "Lillsjölidtjärnen" 2013 206 27.6513840202553 0 35.1118021405824 0 40.9952225888437 0.102201712561354 NA NA NA NA NA NA
"670" "Lillsjölidtjärnen" 2013 207 30.8294918074172 0 40.0405683214327 0 44.4313591741523 0.0428714299232601 NA NA NA NA NA NA
"671" "Lillsjölidtjärnen" 2013 208 31.1545301251223 0 40.893312317967 0 54.5712195693523 0 NA NA NA NA NA NA
"672" "Lillsjölidtjärnen" 2013 209 35.2522142561772 0 46.5421280532795 0 60.6795468726027 0 NA NA NA NA NA NA
"673" "Lillsjölidtjärnen" 2013 210 39.0509176141792 0 52.627524115603 0 74.2433617572139 0 45.1895549164962 0 62.3173444282877 0 95.056081650475 0
"674" "Lillsjölidtjärnen" 2013 211 35.8854649529492 0 44.2202712720482 0 37.8669844941193 0 NA NA NA NA NA NA
"675" "Lillsjölidtjärnen" 2013 212 39.3847817428863 0 53.9966170431132 0 73.6836508161708 0 NA NA NA NA NA NA
"676" "Lillsjölidtjärnen" 2013 213 28.4691049759922 0 35.5598037773886 0 31.9390727343061 0 NA NA NA NA NA NA
"677" "Lillsjölidtjärnen" 2013 214 39.1078074129473 0 50.2912939796537 0 44.7959075457974 0 NA NA NA NA NA NA
"678" "Lillsjölidtjärnen" 2013 215 41.553850549521 0 54.7077526347189 0 74.4812757592245 0 NA NA NA NA NA NA
"679" "Lillsjölidtjärnen" 2013 216 48.9491829587994 0 64.3270270718199 0 66.6476581658872 0.00197949276142169 NA NA NA NA NA NA
"680" "Lillsjölidtjärnen" 2013 217 44.0355833492381 0 55.7655742151309 0 54.4225945171703 0 NA NA NA NA NA NA
"681" "Lillsjölidtjärnen" 2013 218 48.2415834776738 0 63.4217354093394 0 82.0533938092811 0.00118352210919448 NA NA NA NA NA NA
"682" "Lillsjölidtjärnen" 2013 219 44.599709016783 0 57.4149450079202 0 54.462299516449 4.97795827301187e-05 NA NA NA NA NA NA
"683" "Lillsjölidtjärnen" 2013 220 54.0454027276846 0 69.756957394093 0 76.562263008245 0 NA NA NA NA NA NA
"684" "Lillsjölidtjärnen" 2013 221 44.3718003072045 0 54.1563421088833 0 54.2290792551001 0 NA NA NA NA NA NA
"685" "Lillsjölidtjärnen" 2013 222 41.348882661136 0 50.2228270006898 0 48.435924750303 0 NA NA NA NA NA NA
"686" "Lillsjölidtjärnen" 2013 223 48.2764644163461 0 60.5813935911573 0 58.8972978922958 0 NA NA NA NA NA NA
"687" "Lillsjölidtjärnen" 2013 224 52.5718547459367 0 67.0936049857409 0 71.2975712079537 0 45.2083824762124 0 61.7270991007791 0 46.6010646120373 0
"688" "Lillsjölidtjärnen" 2013 225 46.073843871471 0 56.151373477615 0 60.4171004613641 0 NA NA NA NA NA NA
"689" "Lillsjölidtjärnen" 2013 226 44.5615362193349 0 55.4314292749987 0 60.4934470705541 0 NA NA NA NA NA NA
"690" "Lillsjölidtjärnen" 2013 227 50.3134670206528 0 66.4788877253895 0 81.9504985606773 0.0394010463895385 NA NA NA NA NA NA
"691" "Lillsjölidtjärnen" 2013 228 48.4459827825064 0 63.4555310897125 0 78.8483498118183 0 NA NA NA NA NA NA
"692" "Lillsjölidtjärnen" 2013 229 39.1052227615896 0 52.5780721956064 0 60.1213304764231 0.000269817639033552 NA NA NA NA NA NA
"693" "Lillsjölidtjärnen" 2013 230 35.1299176473394 0 47.1928961128275 0 63.2898644889132 0 NA NA NA NA NA NA
"694" "Lillsjölidtjärnen" 2013 231 34.4392073206433 0 44.5444955175894 0 46.469488618949 0.0106437797986516 NA NA NA NA NA NA
"695" "Lillsjölidtjärnen" 2013 232 38.7028305759136 0 49.3743399019482 0 51.383566571312 0.0131891566612539 NA NA NA NA NA NA
"696" "Lillsjölidtjärnen" 2013 233 38.3917454765008 0 48.5316738935892 0 57.8260709403811 0.000237715198133952 NA NA NA NA NA NA
"697" "Lillsjölidtjärnen" 2013 234 52.1858642874486 0 68.3651380377534 0 98.8628924050144 0 NA NA NA NA NA NA
"698" "Lillsjölidtjärnen" 2013 235 52.0602891152665 0 65.2031433207286 0 80.196125429451 0 NA NA NA NA NA NA
"699" "Lillsjölidtjärnen" 2013 236 52.5346856944139 0 65.4786747255088 0 76.382354793214 0.541872216211891 NA NA NA NA NA NA
"700" "Lillsjölidtjärnen" 2013 237 45.8356638336371 0 57.3290633514159 0 65.3626977906421 0.219679173428336 NA NA NA NA NA NA
"701" "Lillsjölidtjärnen" 2013 238 39.2675201615456 0 49.0628653578666 0 55.8328712034823 0.0244233214572947 41.2243959923985 0 52.0631946795645 0 15.6556522387365 0.0374311927704445
"702" "Lillsjölidtjärnen" 2013 239 37.020345661997 0 46.0849134205492 0 50.9978383769335 0.188880236961491 NA NA NA NA NA NA
"703" "Lillsjölidtjärnen" 2013 240 39.1905688980818 0 51.2309895037716 0 75.1296693985803 0 NA NA NA NA NA NA
"704" "Lillsjölidtjärnen" 2013 241 45.5236194141702 0 58.4667942770052 0 75.9887104128726 0 NA NA NA NA NA NA
"705" "Lillsjölidtjärnen" 2013 242 48.4095058090357 0 60.9388768658599 0 74.5297557806571 0 NA NA NA NA NA NA
"706" "Lillsjölidtjärnen" 2013 243 46.4045843118697 0 60.5281656467105 0 80.2918012496212 0.000616774741169044 NA NA NA NA NA NA
"707" "Lillsjölidtjärnen" 2013 244 39.5080444974667 0 49.4755821036478 0 52.7614845454823 0 NA NA NA NA NA NA
"708" "Lillsjölidtjärnen" 2013 245 41.0996329922271 0 50.5226823991524 0 52.9611027333588 0.000102208289785063 NA NA NA NA NA NA
"709" "Lillsjölidtjärnen" 2013 246 40.1882828313031 0 50.8227787130192 0 54.2050490463432 0.00963882020142906 NA NA NA NA NA NA
"710" "Lillsjölidtjärnen" 2013 247 45.0188639580046 0 56.516854477842 0 61.2093501891719 0.0614453420698836 NA NA NA NA NA NA
"711" "Lillsjölidtjärnen" 2013 248 44.9447495785635 0 59.2718388445458 0 68.5245900906001 0.172968778184592 NA NA NA NA NA NA
"712" "Lillsjölidtjärnen" 2013 249 37.0938926252817 0 49.0187035162868 0 61.6739534136867 0.0134874811208218 NA NA NA NA NA NA
"713" "Lillsjölidtjärnen" 2013 250 32.4631865824446 0 40.1297005616592 0 43.7253006277063 0.0470893290816895 NA NA NA NA NA NA
"714" "Lillsjölidtjärnen" 2013 251 31.2888845226276 0 39.3154956857424 0 46.0678357360138 0.0134987208095964 NA NA NA NA NA NA
"715" "Lillsjölidtjärnen" 2013 252 30.3906968531613 0 39.3849854184601 0 52.2091638634118 0.00988832553575155 25.8279841003134 0 35.188553872512 0 22.7265584265407 0.0231416701052746
"716" "Lillsjölidtjärnen" 2013 253 32.3570359547813 0 41.4993402184462 0 46.496901751509 1.41391146212837e-05 NA NA NA NA NA NA
"717" "Lillsjölidtjärnen" 2013 254 32.3784418257209 0 40.412251580715 0 40.6846912068767 5.68180310675039e-05 NA NA NA NA NA NA
"718" "Lillsjölidtjärnen" 2013 255 42.0807721702479 0 52.249811803191 0 58.4630714546011 0.171920068383517 NA NA NA NA NA NA
"719" "Lillsjölidtjärnen" 2013 256 43.1818644650163 0 56.0869690340002 0 68.7790076094135 0.0237936500003955 NA NA NA NA NA NA
"720" "Lillsjölidtjärnen" 2013 257 46.0646774543207 0 60.8625403813381 0 76.1831774486866 0.058823922598453 NA NA NA NA NA NA
"721" "Lillsjölidtjärnen" 2013 258 52.1442017303827 0 70.7371576976339 0 106.279999795792 0 NA NA NA NA NA NA
"722" "Lillsjölidtjärnen" 2013 259 62.0796807860322 0 83.1299036281531 0 134.016875437705 0 NA NA NA NA NA NA
"723" "Lillsjölidtjärnen" 2013 260 56.9168235239665 0 77.3697527238335 0 104.70692849778 0 NA NA NA NA NA NA
"724" "Lillsjölidtjärnen" 2013 261 52.9736585927129 0 72.5271470874422 0 83.0041633668515 0 NA NA NA NA NA NA
"725" "Lillsjölidtjärnen" 2013 262 47.4778079301339 0 64.4749917232065 0 68.647715683918 0.00329137826514678 NA NA NA NA NA NA
"726" "Lillsjölidtjärnen" 2013 263 33.2213632338604 0 42.8959489862441 0 40.4294274466919 0.0166487858276754 NA NA NA NA NA NA
"727" "Lillsjölidtjärnen" 2013 264 65.0875954178797 0 81.0038937509381 0 91.9764557063151 1.91925545893952e-05 NA NA NA NA NA NA
"728" "Lillsjölidtjärnen" 2013 265 69.6518786437474 7.63860848477262 90.938811649397 10.0497239211864 126.18448962827 13.5722864322237 NA NA NA NA NA NA
"729" "Lillsjölidtjärnen" 2013 266 100.146855202146 7.2019086387642 129.5385528237 9.65661485495619 150.600069970178 12.1918116572983 124.288793057931 0 166.215979056081 0 147.065957287533 0
"730" "Lillsjölidtjärnen" 2013 267 122.998605763251 0 157.265969944018 0 188.461334329395 0 NA NA NA NA NA NA
"731" "Lillsjölidtjärnen" 2013 268 123.004487023813 0 156.654658263725 0 197.194550212411 0 NA NA NA NA NA NA
"732" "Lillsjölidtjärnen" 2013 269 134.947434495207 0 181.44078095463 0 258.453245351814 0 NA NA NA NA NA NA
"733" "Lillsjölidtjärnen" 2013 270 117.728858211844 0 155.595865461129 0 155.270363033048 0 NA NA NA NA NA NA
"734" "Lillsjölidtjärnen" 2013 271 109.439491529977 0 133.408286973164 0 107.309629832499 0.00435547355886128 NA NA NA NA NA NA
"735" "Lillsjölidtjärnen" 2013 272 107.153818206687 0 129.97728958347 0 111.5067919971 4.39168306013427e-05 NA NA NA NA NA NA
"736" "Lillsjölidtjärnen" 2013 273 106.923043661098 0 129.745291582775 0 115.18154667665 0 NA NA NA NA NA NA
"739" "Lillsjölidtjärnen" 2014 152 55.849398482386 0 75.7427898491191 0 68.0945904929674 0 NA NA NA NA NA NA
"740" "Lillsjölidtjärnen" 2014 153 53.8218202889746 0 72.6925662197189 0 84.1178351065228 0 NA NA NA NA NA NA
"741" "Lillsjölidtjärnen" 2014 154 45.1686437447192 0 58.9469209792431 0 62.9273386729793 0 NA NA NA NA NA NA
"742" "Lillsjölidtjärnen" 2014 155 49.3545870872585 0 64.8755859616088 0 66.1436333739618 0 NA NA NA NA NA NA
"743" "Lillsjölidtjärnen" 2014 156 54.1092857725429 0 69.8447713781227 0 66.3059367921121 0 NA NA NA NA NA NA
"744" "Lillsjölidtjärnen" 2014 157 55.4815038621002 0 73.3180375108162 0 79.8668910005899 0 NA NA NA NA NA NA
"745" "Lillsjölidtjärnen" 2014 158 51.937496024057 0 65.2682582068649 0 63.0901941717426 0 NA NA NA NA NA NA
"746" "Lillsjölidtjärnen" 2014 159 47.7629326512459 0 58.7419188698273 0 45.8658161065791 0 NA NA NA NA NA NA
"747" "Lillsjölidtjärnen" 2014 160 58.5040968763645 0 72.4408022517472 0 60.112539323383 0 51.2596576862774 0 62.1554303345683 0 32.1838486136834 0
"748" "Lillsjölidtjärnen" 2014 161 60.3071695070865 0 73.6392535100278 0 55.7116998953278 0 NA NA NA NA NA NA
"749" "Lillsjölidtjärnen" 2014 162 75.3951815897369 0 100.299097073521 0 118.29578723712 0 NA NA NA NA NA NA
"750" "Lillsjölidtjärnen" 2014 163 67.3960528394461 0 90.5414063406173 0 101.096504907554 0 NA NA NA NA NA NA
"751" "Lillsjölidtjärnen" 2014 164 57.0762252314432 0 76.1556892938939 0 90.6861563590077 0 NA NA NA NA NA NA
"752" "Lillsjölidtjärnen" 2014 165 56.1274152472272 0 74.1421607966456 0 88.5328402418058 0 NA NA NA NA NA NA
"753" "Lillsjölidtjärnen" 2014 166 47.4226807318624 0 63.3120138662862 0 82.6273460501511 0 NA NA NA NA NA NA
"754" "Lillsjölidtjärnen" 2014 167 57.4076029524674 0 76.9175942620458 0 127.609855226934 0 NA NA NA NA NA NA
"755" "Lillsjölidtjärnen" 2014 168 47.7902552513612 0 65.3331260384713 0 87.265617817508 0 NA NA NA NA NA NA
"756" "Lillsjölidtjärnen" 2014 169 57.0777543832279 0 76.8663934684838 0 115.619773134615 0 NA NA NA NA NA NA
"757" "Lillsjölidtjärnen" 2014 170 43.0657549781902 0 55.54082180799 0 54.4958600713666 0 NA NA NA NA NA NA
"758" "Lillsjölidtjärnen" 2014 171 41.5996444906224 0 55.0466232342503 0 71.4970490486813 0 NA NA NA NA NA NA
"759" "Lillsjölidtjärnen" 2014 172 37.3734952314687 0 47.4007327636613 0 47.3440645095216 0 NA NA NA NA NA NA
"760" "Lillsjölidtjärnen" 2014 173 35.029375874949 0 43.723885586908 0 41.377294204819 0 NA NA NA NA NA NA
"761" "Lillsjölidtjärnen" 2014 174 33.5779049775875 0 43.0052515359182 0 37.5070232806567 0 31.4633010949303 0 41.3957843556509 0 18.7704749428732 0
"762" "Lillsjölidtjärnen" 2014 175 30.9860281537756 0 39.9053751938599 0 35.5403481854137 0 NA NA NA NA NA NA
"763" "Lillsjölidtjärnen" 2014 176 30.3909472500016 0 39.1151301341385 0 36.2574858896814 0 NA NA NA NA NA NA
"764" "Lillsjölidtjärnen" 2014 177 31.5715652008077 0 41.0091569376207 0 42.9096806169844 0 NA NA NA NA NA NA
"765" "Lillsjölidtjärnen" 2014 178 31.311572232193 0 40.2842923781164 0 41.942204246309 0 NA NA NA NA NA NA
"766" "Lillsjölidtjärnen" 2014 179 32.1881038567093 0 42.1483895416944 0 47.0325290345767 0 NA NA NA NA NA NA
"767" "Lillsjölidtjärnen" 2014 180 31.8254564804878 0 41.6467744265292 0 47.5087116320501 0 NA NA NA NA NA NA
"768" "Lillsjölidtjärnen" 2014 181 28.8401781608349 0 37.1628263746064 0 34.5723654236572 0 NA NA NA NA NA NA
"769" "Lillsjölidtjärnen" 2014 182 28.2958232518467 0 35.8108128727263 0 34.7722374349634 0 NA NA NA NA NA NA
"770" "Lillsjölidtjärnen" 2014 183 30.7070633573032 0 39.8804060217873 0 44.6756870681455 0 NA NA NA NA NA NA
"771" "Lillsjölidtjärnen" 2014 184 31.833691748952 0 41.6208199527149 0 41.9146278017047 0 NA NA NA NA NA NA
"772" "Lillsjölidtjärnen" 2014 185 34.6204538721822 0 45.3677157571085 0 45.1449246803683 0 NA NA NA NA NA NA
"773" "Lillsjölidtjärnen" 2014 186 46.2303173550483 0 61.4352206126898 0 92.0565347052793 0 NA NA NA NA NA NA
"774" "Lillsjölidtjärnen" 2014 187 40.2768795134864 0 54.6744827046509 0 75.585403789768 0 NA NA NA NA NA NA
"775" "Lillsjölidtjärnen" 2014 188 40.9211677060197 0 54.1719171319489 0 74.4396147002151 1.38014890612601 39.6783814568292 0 53.5306664921114 0 80.3957217549033 0
"776" "Lillsjölidtjärnen" 2014 189 32.9089681805857 0 41.7275241262458 0 38.9620077482648 2.92439712059438 NA NA NA NA NA NA
"777" "Lillsjölidtjärnen" 2014 190 35.9332496695247 0 45.5318754832317 0 45.5232183661931 3.32267094669145 NA NA NA NA NA NA
"778" "Lillsjölidtjärnen" 2014 191 44.1160320454569 0 57.9757274520712 0 72.106014229224 5.44244989252434 NA NA NA NA NA NA
"779" "Lillsjölidtjärnen" 2014 192 47.1291146683883 0 62.1060439719412 0 80.9812577022425 5.77971575596694 NA NA NA NA NA NA
"780" "Lillsjölidtjärnen" 2014 193 49.3811929855443 0 65.2810308882357 0 93.6633332820467 6.68611214609775 NA NA NA NA NA NA
"781" "Lillsjölidtjärnen" 2014 194 43.4965327331957 0 56.7533473608536 0 74.7473309368855 5.15776735294876 NA NA NA NA NA NA
"782" "Lillsjölidtjärnen" 2014 195 36.2534270423917 0 47.52377884105 0 57.2271463586672 4.06203391994881 NA NA NA NA NA NA
"783" "Lillsjölidtjärnen" 2014 196 31.4364623210543 0 39.7861211416669 0 48.5267217173768 4.15599790680148 NA NA NA NA NA NA
"784" "Lillsjölidtjärnen" 2014 197 41.7525985447814 0 54.1810963543786 0 55.3005251833251 6.85945307570723 NA NA NA NA NA NA
"785" "Lillsjölidtjärnen" 2014 198 39.0312559825119 0 49.4131851625105 0 52.3369691678952 5.79406277029193 NA NA NA NA NA NA
"786" "Lillsjölidtjärnen" 2014 199 32.4174237050843 0 40.1009574029305 0 44.8156930892968 4.40374291083039 NA NA NA NA NA NA
"787" "Lillsjölidtjärnen" 2014 200 34.7706210801157 0 43.7168119055036 0 46.4146914124433 3.78913593581944 NA NA NA NA NA NA
"788" "Lillsjölidtjärnen" 2014 201 31.5819790133389 0 39.8936724904942 0 41.6626349169037 2.6133909488111 NA NA NA NA NA NA
"789" "Lillsjölidtjärnen" 2014 202 29.7128418325962 0 37.5291902235869 0 40.598077747354 2.58787086670253 28.1567807594278 0 37.2121638039804 0 23.7296439343809 4.18056258171018
"790" "Lillsjölidtjärnen" 2014 203 32.066509600899 0 39.973303265758 0 37.6429373077122 2.67537176508841 NA NA NA NA NA NA
"791" "Lillsjölidtjärnen" 2014 204 32.527309545317 0 42.2500408657712 0 50.8908531265788 2.58788961283317 NA NA NA NA NA NA
"792" "Lillsjölidtjärnen" 2014 205 39.0356996164002 0 48.9592395059561 0 50.4306655729686 3.76069738488353 NA NA NA NA NA NA
"793" "Lillsjölidtjärnen" 2014 206 37.2861891873464 0 46.7286559579502 0 45.7295681444919 3.34321752716478 NA NA NA NA NA NA
"794" "Lillsjölidtjärnen" 2014 207 37.5263089087199 0 47.4370273320573 0 47.2347714220737 3.32277164860174 NA NA NA NA NA NA
"795" "Lillsjölidtjärnen" 2014 208 33.4114392624614 0 42.0127416169347 0 50.244500073338 3.39498648825503 NA NA NA NA NA NA
"796" "Lillsjölidtjärnen" 2014 209 39.3991335682001 0 49.1198645938697 0 54.2705297057638 4.92612389585927 NA NA NA NA NA NA
"797" "Lillsjölidtjärnen" 2014 210 59.6927327594957 0 76.2470119842183 0 86.4321249299567 10.3976774586387 NA NA NA NA NA NA
"798" "Lillsjölidtjärnen" 2014 211 59.5400054041208 0 80.2825933963263 0 124.515948274369 4.42441558398044 NA NA NA NA NA NA
"799" "Lillsjölidtjärnen" 2014 212 49.8431709113367 0 66.0102382257379 0 79.6297593741557 6.40830623459821 NA NA NA NA NA NA
"800" "Lillsjölidtjärnen" 2014 213 42.2867400815116 0 53.7738639630955 0 76.7711395561343 6.04867698124145 NA NA NA NA NA NA
"801" "Lillsjölidtjärnen" 2014 214 64.3704284503506 0 84.02142375709 0 117.387822673835 10.8574387902054 NA NA NA NA NA NA
"802" "Lillsjölidtjärnen" 2014 215 55.7123258824958 0 73.8453734676101 0 108.926133367711 4.08371331398958 NA NA NA NA NA NA
"803" "Lillsjölidtjärnen" 2014 216 53.1508488863466 0 73.3032175339295 0 104.554883689127 1.30249355806523 52.2490377166664 0 69.9736204611428 0 105.567391651715 0.779789921505486
"804" "Lillsjölidtjärnen" 2014 217 39.6603434584914 0 53.9707782806769 0 75.2611574982469 1.32017316006615 NA NA NA NA NA NA
"805" "Lillsjölidtjärnen" 2014 218 44.2992585885688 0 59.5813469011787 0 85.6272329699881 2.46245292971303 NA NA NA NA NA NA
"806" "Lillsjölidtjärnen" 2014 219 30.1678699322618 0 38.9417578942148 0 48.2801878748807 2.34208056352575 NA NA NA NA NA NA
"807" "Lillsjölidtjärnen" 2014 220 31.1009469469554 0 38.6594173387157 0 45.0373516581537 4.01397890806772 NA NA NA NA NA NA
"808" "Lillsjölidtjärnen" 2014 221 36.421654356066 0 45.1752540795 0 58.2813841243801 5.32192558406786 NA NA NA NA NA NA
"809" "Lillsjölidtjärnen" 2014 222 42.2499828341611 0 53.4657895445993 0 71.2906072074293 5.40424521187324 NA NA NA NA NA NA
"810" "Lillsjölidtjärnen" 2014 223 56.2890804870713 0 72.4298951489589 0 97.7805358791063 5.8722729841422 NA NA NA NA NA NA
"811" "Lillsjölidtjärnen" 2014 224 41.7310585629556 0 53.0472700588391 0 65.7458852974499 6.72255050051385 NA NA NA NA NA NA
"812" "Lillsjölidtjärnen" 2014 225 55.6303417000472 0 71.3134816631312 0 89.3017639352794 8.83379647693477 NA NA NA NA NA NA
"813" "Lillsjölidtjärnen" 2014 226 63.1945678662524 0 81.1647287863502 0 107.815481362356 8.56198561740363 NA NA NA NA NA NA
"814" "Lillsjölidtjärnen" 2014 227 51.3556463537112 0.00636506673356883 66.466168494017 0.038273806680629 97.0532010256646 6.36328121657182 NA NA NA NA NA NA
"815" "Lillsjölidtjärnen" 2014 228 59.9153018199935 0.0281652969099438 77.1825997651943 0.208694008864236 114.178840197843 9.74508754966797 NA NA NA NA NA NA
"816" "Lillsjölidtjärnen" 2014 229 56.9857130780261 0 71.4271648148928 0 97.6246426584798 10.6706685092065 NA NA NA NA NA NA
"817" "Lillsjölidtjärnen" 2014 230 49.1821386198318 0 61.8451413350612 0 78.1767454583284 4.12360871744911 45.4546615857578 0 57.9193506966405 0 40.3657999842134 7.78764380954226
"818" "Lillsjölidtjärnen" 2014 231 53.997324880816 0 66.1757128911912 0 73.5955561715108 6.31230789855869 NA NA NA NA NA NA
"819" "Lillsjölidtjärnen" 2014 232 53.8810503836557 0 66.8767369553792 0 78.1669956871563 6.23267396087166 NA NA NA NA NA NA
"820" "Lillsjölidtjärnen" 2014 233 43.5861004725966 0 53.0301992215519 0 66.078109437774 6.01255157017172 NA NA NA NA NA NA
"821" "Lillsjölidtjärnen" 2014 234 59.6574914121734 6.14895513244797 72.4368790087407 7.46570272674655 84.1397935369271 15.3922892851436 NA NA NA NA NA NA
"822" "Lillsjölidtjärnen" 2014 235 64.2965345649361 5.93234289647354 78.1221407674302 7.20651539017281 91.2589177717582 16.1265990520667 NA NA NA NA NA NA
"823" "Lillsjölidtjärnen" 2014 236 67.1787250364329 6.45505692199188 81.5179783369896 7.83278242030844 97.077994346503 15.0428308255712 NA NA NA NA NA NA
"824" "Lillsjölidtjärnen" 2014 237 68.4803930506323 6.67655617217058 83.4730136856544 8.13922168666435 94.6801735497319 14.4232361198213 NA NA NA NA NA NA
"825" "Lillsjölidtjärnen" 2014 238 74.3634827627719 6.69506951402268 96.4144427931732 8.67546604119762 105.684902231009 10.6727980597859 NA NA NA NA NA NA
"826" "Lillsjölidtjärnen" 2014 239 103.811160325892 0 143.035088558298 0 185.585247040369 1.16559240972261 NA NA NA NA NA NA
"827" "Lillsjölidtjärnen" 2014 240 88.8446089566865 0 116.313080175852 0 112.377580443435 1.68541193185459 NA NA NA NA NA NA
"828" "Lillsjölidtjärnen" 2014 241 81.0087782759794 0 99.090919567982 0 100.182014782598 6.08945288858479 NA NA NA NA NA NA
"829" "Lillsjölidtjärnen" 2014 242 78.5553922345637 0 97.5854788503476 0 115.69267847175 4.68642453388204 NA NA NA NA NA NA
"830" "Lillsjölidtjärnen" 2014 243 84.6814089949645 0 106.042296005776 0 131.434456013046 9.01753185569755 NA NA NA NA NA NA
"831" "Lillsjölidtjärnen" 2014 244 79.5002065495272 0 101.523790509647 0 123.072665603212 1.50021943798659 86.1686131490038 0 118.14363404657 0 96.3133104757097 0
"832" "Lillsjölidtjärnen" 2014 245 76.1651464119687 0 93.9497174791641 0 103.915070861367 0 NA NA NA NA NA NA
"833" "Lillsjölidtjärnen" 2014 246 66.6165207791001 0 84.3214272949786 0 96.9361105197147 0 NA NA NA NA NA NA
"834" "Lillsjölidtjärnen" 2014 247 64.1959306166496 0 81.3227564452089 0 95.8888580270921 0 NA NA NA NA NA NA
"835" "Lillsjölidtjärnen" 2014 248 53.0615530987552 0 65.4867497223027 0 74.5497914707423 0 NA NA NA NA NA NA
"836" "Lillsjölidtjärnen" 2014 249 55.9637999030946 0 68.4146781872903 0 82.0191130492003 0 NA NA NA NA NA NA
"837" "Lillsjölidtjärnen" 2014 250 57.3013435756572 0 71.0152107176019 0 79.5120796463376 0 NA NA NA NA NA NA
"838" "Lillsjölidtjärnen" 2014 251 56.5738539909468 0 70.9881645851287 0 71.2091858639619 0 NA NA NA NA NA NA
"839" "Lillsjölidtjärnen" 2014 252 56.5413118269732 0 69.0364637705733 0 66.0196246220077 0 NA NA NA NA NA NA
"840" "Lillsjölidtjärnen" 2014 253 59.2993378457338 0 75.40512633716 0 82.729898832459 0 NA NA NA NA NA NA
"841" "Lillsjölidtjärnen" 2014 254 68.7530142219887 0 86.3392885131469 0 96.2123824271001 0 NA NA NA NA NA NA
"842" "Lillsjölidtjärnen" 2014 255 63.7912894400403 0 82.1538962484512 0 99.5324644775439 0 NA NA NA NA NA NA
"843" "Lillsjölidtjärnen" 2014 256 71.9078649380134 0 89.6608833101262 0 107.01756816791 0 NA NA NA NA NA NA
"844" "Lillsjölidtjärnen" 2014 257 69.4387173342423 0 88.7238837804729 0 106.890053243424 0 NA NA NA NA NA NA
"845" "Lillsjölidtjärnen" 2014 258 76.6549107033248 0 93.9663166396105 0 109.859514307121 1.56901286088198 81.8943304278699 0 103.589649955477 0 29.2340011523395 0
"846" "Lillsjölidtjärnen" 2014 259 73.9718090646588 0 91.5132767059737 0 99.8339153741711 1.28805898517501 NA NA NA NA NA NA
"847" "Lillsjölidtjärnen" 2014 260 71.1269429823861 0 86.8813891919463 0 86.485252079593 3.99630887581389 NA NA NA NA NA NA
"848" "Lillsjölidtjärnen" 2014 261 62.7872569416239 0 76.7525910681015 0 84.0703678048548 2.43309696920417 NA NA NA NA NA NA
"849" "Lillsjölidtjärnen" 2014 262 63.0244179131706 0 76.9211427180253 0 83.797373773014 1.39017583478204 NA NA NA NA NA NA
"850" "Lillsjölidtjärnen" 2014 263 63.7868572053304 0 78.2920728423662 0 85.8891687175412 1.93119546662503 NA NA NA NA NA NA
"851" "Lillsjölidtjärnen" 2014 264 60.7583025289381 0 76.8979402870312 0 82.2493801571897 0.935964407884451 NA NA NA NA NA NA
"852" "Lillsjölidtjärnen" 2014 265 74.5056223389133 0 93.3905509759814 0 128.452311229266 7.13059350690359 NA NA NA NA NA NA
"853" "Lillsjölidtjärnen" 2014 266 94.6471875928867 0 119.24408984929 0 169.058111748459 9.51685149800335 NA NA NA NA NA NA
"854" "Lillsjölidtjärnen" 2014 267 101.582938694853 0 125.908172679119 0 166.66519021218 0.000950120384273483 NA NA NA NA NA NA
"855" "Lillsjölidtjärnen" 2014 268 101.669340664302 0 127.417698062874 0 151.106636675235 0 NA NA NA NA NA NA
"856" "Lillsjölidtjärnen" 2014 269 107.457367565195 0 141.639105566435 0 164.932250353646 0 NA NA NA NA NA NA
"857" "Lillsjölidtjärnen" 2014 270 100.008347394731 0 133.331987485978 0 157.99113658206 0 NA NA NA NA NA NA
"858" "Lillsjölidtjärnen" 2014 271 88.1513231238234 0 112.323725341316 0 98.0862575190776 0 NA NA NA NA NA NA
"859" "Lillsjölidtjärnen" 2014 272 99.2634038158714 0 133.220911268714 0 175.202291820328 0 117.69074146827 0 161.154904129402 0 212.74642516149 0
"860" "Lillsjölidtjärnen" 2014 273 82.7694372549379 0 108.357048736755 0 105.620352847032 0 NA NA NA NA NA NA
"863" "Lillsjölidtjärnen" 2015 152 39.8036650487862 0 53.2473391427231 0 69.0389666053372 0 NA NA NA NA NA NA
"864" "Lillsjölidtjärnen" 2015 153 42.2592292248917 0 56.7035387392211 0 72.9177765897943 0 NA NA NA NA NA NA
"865" "Lillsjölidtjärnen" 2015 154 28.9353772148864 0 37.7918511085639 0 31.8240354283919 0 NA NA NA NA NA NA
"866" "Lillsjölidtjärnen" 2015 155 39.7392675489217 0 54.2112569584561 0 70.701791270542 0 NA NA NA NA NA NA
"867" "Lillsjölidtjärnen" 2015 156 37.1379192698445 0 49.5129794600183 0 58.75075116899 0 NA NA NA NA NA NA
"868" "Lillsjölidtjärnen" 2015 157 31.7087575034728 0 41.3995873643634 0 45.6473974263336 0 NA NA NA NA NA NA
"869" "Lillsjölidtjärnen" 2015 158 33.6000871814241 0 45.6954075779961 0 51.9203404086624 0 NA NA NA NA NA NA
"870" "Lillsjölidtjärnen" 2015 159 34.4169012430981 0 46.1978093108906 0 60.6962100539217 0 NA NA NA NA NA NA
"871" "Lillsjölidtjärnen" 2015 160 29.1890210402831 0 38.9682168252902 0 41.8850791078873 0 NA NA NA NA NA NA
"872" "Lillsjölidtjärnen" 2015 161 29.5502864665639 0 39.4883646022235 0 48.2389474475717 0 32.8088270836697 0 44.8984281791773 0 58.2513859810045 0
"873" "Lillsjölidtjärnen" 2015 162 32.45363231138 0 44.1728605175966 0 61.792483182118 0 NA NA NA NA NA NA
"874" "Lillsjölidtjärnen" 2015 163 24.8756232815358 0 33.1501232614614 0 35.7716187731974 0 NA NA NA NA NA NA
"875" "Lillsjölidtjärnen" 2015 164 23.9245530989188 0 31.7286373128108 0 39.7335579936299 0 NA NA NA NA NA NA
"876" "Lillsjölidtjärnen" 2015 165 20.8225043658946 0 26.0185509810168 0 25.8492895696652 0 NA NA NA NA NA NA
"877" "Lillsjölidtjärnen" 2015 166 29.148991559717 0 39.926559892192 0 55.7078589440018 0 NA NA NA NA NA NA
"878" "Lillsjölidtjärnen" 2015 167 32.7884676462354 0 44.6834630315618 0 69.6506852162511 0 NA NA NA NA NA NA
"879" "Lillsjölidtjärnen" 2015 168 28.0949068747217 0 37.333979529724 0 42.0838867107043 0 NA NA NA NA NA NA
"880" "Lillsjölidtjärnen" 2015 169 24.9631287927089 0 32.696417781905 0 34.2777585399756 0 NA NA NA NA NA NA
"881" "Lillsjölidtjärnen" 2015 170 23.5214785028318 0 30.5068200893366 0 30.672811437302 0 NA NA NA NA NA NA
"882" "Lillsjölidtjärnen" 2015 171 23.2255079951716 0 29.8244366662846 0 30.8702248807223 0 NA NA NA NA NA NA
"883" "Lillsjölidtjärnen" 2015 172 24.0966642628972 0 30.7549017160305 0 27.1010598942821 0 NA NA NA NA NA NA
"884" "Lillsjölidtjärnen" 2015 173 25.9558635682606 0 33.9820730570477 0 33.9817718074693 0 NA NA NA NA NA NA
"885" "Lillsjölidtjärnen" 2015 174 25.4004903773087 0 33.3695900609344 0 32.2123997177825 0 NA NA NA NA NA NA
"886" "Lillsjölidtjärnen" 2015 175 27.2785672845509 0 34.4814870864873 0 30.7402984377443 0 23.9231776526979 0 30.675952763214 0 11.5981631548338 0
"887" "Lillsjölidtjärnen" 2015 176 32.2891118920831 0 44.1618634916762 0 47.1610419401753 0 NA NA NA NA NA NA
"888" "Lillsjölidtjärnen" 2015 177 28.7735547181576 0 37.3012423893302 0 32.8810649076109 0 NA NA NA NA NA NA
"889" "Lillsjölidtjärnen" 2015 178 26.5302144356077 0 33.2348569022225 0 25.0886516374406 0 NA NA NA NA NA NA
"890" "Lillsjölidtjärnen" 2015 179 25.7553678473954 0 33.7975315517172 0 34.7165121141874 0 NA NA NA NA NA NA
"891" "Lillsjölidtjärnen" 2015 180 24.9055062682299 0 31.1438069867446 0 29.0810287336641 0 NA NA NA NA NA NA
"892" "Lillsjölidtjärnen" 2015 181 25.9043325733354 0 32.7468669153511 0 28.976860618119 0 NA NA NA NA NA NA
"893" "Lillsjölidtjärnen" 2015 182 34.2324408237743 0 44.9813994096908 0 46.8045935002634 0 NA NA NA NA NA NA
"894" "Lillsjölidtjärnen" 2015 183 32.8143821696198 0 42.5869788819437 0 36.6152808123544 0 NA NA NA NA NA NA
"895" "Lillsjölidtjärnen" 2015 184 32.6320169184639 0 42.27015922879 0 39.3951732059047 0 NA NA NA NA NA NA
"896" "Lillsjölidtjärnen" 2015 185 43.1636851495685 0 59.0616862761681 0 84.3767228888573 0 NA NA NA NA NA NA
"897" "Lillsjölidtjärnen" 2015 186 39.2606630402357 0 51.9885166462152 0 70.0638935263524 0 NA NA NA NA NA NA
"898" "Lillsjölidtjärnen" 2015 187 41.3379839583056 0 56.2587400809354 0 84.7222380003932 0 NA NA NA NA NA NA
"899" "Lillsjölidtjärnen" 2015 188 37.3880684878886 0 48.8558955757605 0 51.2780074463348 0 35.4426252904983 0 46.6370368157217 0 35.252058613613 0
"900" "Lillsjölidtjärnen" 2015 189 40.9457031763642 0 52.7986060040987 0 57.7568282359274 0 NA NA NA NA NA NA
"901" "Lillsjölidtjärnen" 2015 190 31.4708316600177 0 38.7409714828704 0 39.0351932552074 0 NA NA NA NA NA NA
"902" "Lillsjölidtjärnen" 2015 191 30.1212323297972 0 37.4829231681853 0 30.1679884892471 0 NA NA NA NA NA NA
"903" "Lillsjölidtjärnen" 2015 192 33.6653591460183 0 42.5941369676862 0 37.8095987822048 0 NA NA NA NA NA NA
"904" "Lillsjölidtjärnen" 2015 193 30.0149397963092 0 36.9802012836055 0 32.7568388863397 0 NA NA NA NA NA NA
"905" "Lillsjölidtjärnen" 2015 194 36.3814141197683 0 47.0985191847116 0 50.4297922475966 0 NA NA NA NA NA NA
"906" "Lillsjölidtjärnen" 2015 195 29.982478475538 0 38.00084077952 0 40.0016357549405 0 NA NA NA NA NA NA
"907" "Lillsjölidtjärnen" 2015 196 26.9350534062752 0 34.0381015615189 0 33.9746296827486 0 NA NA NA NA NA NA
"908" "Lillsjölidtjärnen" 2015 197 34.0030778888741 0 43.5645983042037 0 45.7882227086824 0 NA NA NA NA NA NA
"909" "Lillsjölidtjärnen" 2015 198 35.6608803475594 0 48.0343043110942 0 62.4341671493575 0 NA NA NA NA NA NA
"910" "Lillsjölidtjärnen" 2015 199 40.4054611885966 0 53.7469875649669 0 83.202902578753 0 NA NA NA NA NA NA
"911" "Lillsjölidtjärnen" 2015 200 41.1956633243391 0 53.3900037841086 0 60.1047867293416 0 NA NA NA NA NA NA
"912" "Lillsjölidtjärnen" 2015 201 36.4830795973097 0 48.5306170255467 0 68.9320126277683 0 NA NA NA NA NA NA
"913" "Lillsjölidtjärnen" 2015 202 33.1403134615878 0 42.9442469892413 0 52.1795871935012 0 NA NA NA NA NA NA
"914" "Lillsjölidtjärnen" 2015 203 27.7464278003861 0 34.9182318903347 0 38.6126154238926 0 NA NA NA NA NA NA
"915" "Lillsjölidtjärnen" 2015 204 26.0836227372488 0 33.0861016017055 0 36.2519967145477 0 32.035805094533 0 42.56041042251 0 20.6948514792109 0
"916" "Lillsjölidtjärnen" 2015 205 28.0089235798498 0 34.6443628477782 0 34.9620670669581 0 NA NA NA NA NA NA
"917" "Lillsjölidtjärnen" 2015 206 32.0741145704174 0 41.2387870256564 0 53.0324513529865 0 NA NA NA NA NA NA
"918" "Lillsjölidtjärnen" 2015 207 31.8705006821311 0 39.9312715874224 0 49.9249387679149 0 NA NA NA NA NA NA
"919" "Lillsjölidtjärnen" 2015 208 35.5390681907953 0 47.6096223986783 0 53.9799438401477 0 NA NA NA NA NA NA
"920" "Lillsjölidtjärnen" 2015 209 37.4438113522422 0 48.8881246504046 0 56.0689080864524 0 NA NA NA NA NA NA
"921" "Lillsjölidtjärnen" 2015 210 32.213431891997 0 39.9979463978474 0 35.7247877962575 0 NA NA NA NA NA NA
"922" "Lillsjölidtjärnen" 2015 211 25.7077151920526 0 31.2569443055489 0 28.9489420922551 0 NA NA NA NA NA NA
"923" "Lillsjölidtjärnen" 2015 212 32.0228729592328 0 40.8594409085535 0 39.5536169013166 0 NA NA NA NA NA NA
"924" "Lillsjölidtjärnen" 2015 213 44.2103791073543 0 59.7332824957747 0 70.1124037951537 0 NA NA NA NA NA NA
"925" "Lillsjölidtjärnen" 2015 214 41.7964851419655 0 53.3548911952065 0 57.3876354874539 0 NA NA NA NA NA NA
"926" "Lillsjölidtjärnen" 2015 215 34.2408065936035 0 44.0248939774781 0 46.4281142254083 0 NA NA NA NA NA NA
"927" "Lillsjölidtjärnen" 2015 216 38.5773047487127 0 49.4992521558343 0 57.2427010238297 0 44.8306479855885 0 56.5459694634848 0 20.0742844775439 0
"928" "Lillsjölidtjärnen" 2015 217 36.5100874173088 0 48.9847634325119 0 63.5835359571905 0 NA NA NA NA NA NA
"929" "Lillsjölidtjärnen" 2015 218 33.7440333750397 0 42.1495515522407 0 32.6130089582757 0 NA NA NA NA NA NA
"930" "Lillsjölidtjärnen" 2015 219 32.3189360869897 0 41.2110953130637 0 36.7440217318887 0 NA NA NA NA NA NA
"931" "Lillsjölidtjärnen" 2015 220 26.8641650764578 0 34.4481156101979 0 36.0977440495266 0 NA NA NA NA NA NA
"932" "Lillsjölidtjärnen" 2015 221 33.2908973204219 0 41.0684567029293 0 39.9929011370798 0 NA NA NA NA NA NA
"933" "Lillsjölidtjärnen" 2015 222 41.0564075793711 0 53.7666109862129 0 63.817553487114 0 NA NA NA NA NA NA
"934" "Lillsjölidtjärnen" 2015 223 37.5389412947975 0 49.41391821308 0 53.4924484868942 0 NA NA NA NA NA NA
"935" "Lillsjölidtjärnen" 2015 224 41.03720900663 0 53.8324148739696 0 59.251057114659 0 NA NA NA NA NA NA
"936" "Lillsjölidtjärnen" 2015 225 47.0279403070378 0 62.5018751430779 0 83.7323347217259 0 NA NA NA NA NA NA
"937" "Lillsjölidtjärnen" 2015 226 42.0869190857657 0 53.5279253035011 0 58.2233611180612 0 NA NA NA NA NA NA
"938" "Lillsjölidtjärnen" 2015 227 35.513676087273 0 45.823634244082 0 52.8479219365483 0 NA NA NA NA NA NA
"939" "Lillsjölidtjärnen" 2015 228 37.748721251949 0 49.2139673394515 0 59.8174111469173 0 NA NA NA NA NA NA
"940" "Lillsjölidtjärnen" 2015 229 35.332001921633 0 45.2290737717024 0 55.4703994823302 0 NA NA NA NA NA NA
"941" "Lillsjölidtjärnen" 2015 230 30.8306805266128 0 39.3411493900954 0 46.0550958114119 0 NA NA NA NA NA NA
"942" "Lillsjölidtjärnen" 2015 231 30.2241972275664 0 39.1104764486961 0 42.0639641400933 0 30.2117240868485 0 39.2523714707126 0 15.9310151969804 0
"943" "Lillsjölidtjärnen" 2015 232 28.1534834014828 0 36.5834365546233 0 38.1150122999835 0 NA NA NA NA NA NA
"944" "Lillsjölidtjärnen" 2015 233 24.8097738523906 0 31.476537065564 0 30.077619609961 0 NA NA NA NA NA NA
"945" "Lillsjölidtjärnen" 2015 234 24.3737456654124 0 30.8223582544797 0 29.8701155723995 0 NA NA NA NA NA NA
"946" "Lillsjölidtjärnen" 2015 235 27.7083720486861 0 35.1435821893374 0 34.5332647183061 0 NA NA NA NA NA NA
"947" "Lillsjölidtjärnen" 2015 236 25.4574229950355 0 31.9158169416582 0 31.7590803878253 0 NA NA NA NA NA NA
"948" "Lillsjölidtjärnen" 2015 237 29.0553886544256 0 37.3646415338616 0 42.2078401586373 0 NA NA NA NA NA NA
"949" "Lillsjölidtjärnen" 2015 238 25.9016592829317 0 33.6771195939618 0 38.3188606583983 0 NA NA NA NA NA NA
"950" "Lillsjölidtjärnen" 2015 239 37.5197137209124 0 49.7638922257608 0 68.1650729480808 0 NA NA NA NA NA NA
"951" "Lillsjölidtjärnen" 2015 240 35.0890315133385 0 46.7163999092706 0 55.7156681604041 0 NA NA NA NA NA NA
"952" "Lillsjölidtjärnen" 2015 241 44.2271330412954 0 57.1831998768918 0 71.1837135668998 0 NA NA NA NA NA NA
"953" "Lillsjölidtjärnen" 2015 242 41.7424482506459 0 52.4750919158947 0 61.966766876264 0 NA NA NA NA NA NA
"954" "Lillsjölidtjärnen" 2015 243 38.7568302673958 0 47.6822512562426 0 53.7064042974183 0 NA NA NA NA NA NA
"955" "Lillsjölidtjärnen" 2015 244 39.7037507995894 0 49.2192904823639 0 59.0002518118327 0 NA NA NA NA NA NA
"956" "Lillsjölidtjärnen" 2015 245 43.5179728663736 0 54.1257546030583 0 64.0730055886221 0 48.6443629417518 0 60.3523180729839 0 26.6563026497733 0
"957" "Lillsjölidtjärnen" 2015 246 42.8116688295402 0 52.9231371150066 0 66.1534997534591 0 NA NA NA NA NA NA
"958" "Lillsjölidtjärnen" 2015 247 39.7068372994672 0 49.6227625833326 0 57.1543421089763 0 NA NA NA NA NA NA
"959" "Lillsjölidtjärnen" 2015 248 34.0413856044553 0 42.1547546268079 0 44.9659129783167 0 NA NA NA NA NA NA
"960" "Lillsjölidtjärnen" 2015 249 37.3756427944605 0 49.5945017629507 0 65.318107071809 0 NA NA NA NA NA NA
"961" "Lillsjölidtjärnen" 2015 250 50.84473974791 0 67.8592339147043 0 93.4837367644938 0 NA NA NA NA NA NA
"962" "Lillsjölidtjärnen" 2015 251 52.1041832242327 0 70.7992743237733 0 96.3817055352118 0 NA NA NA NA NA NA
"963" "Lillsjölidtjärnen" 2015 252 45.5257141960541 0 57.8979199635644 0 69.9637356610067 0 NA NA NA NA NA NA
"964" "Lillsjölidtjärnen" 2015 253 43.3913483534956 0 53.3119919750436 0 58.4071013009436 0 NA NA NA NA NA NA
"965" "Lillsjölidtjärnen" 2015 254 41.0600180860359 0 51.7238324657064 0 56.7987587205677 0 NA NA NA NA NA NA
"966" "Lillsjölidtjärnen" 2015 255 36.8582381119258 0 47.9133581319315 0 56.0011962276473 0 NA NA NA NA NA NA
"967" "Lillsjölidtjärnen" 2015 256 34.0606505964884 0 45.208070710659 0 54.1785572871752 0 NA NA NA NA NA NA
"968" "Lillsjölidtjärnen" 2015 257 33.135277920402 0 45.0493392848519 0 54.4892237148421 0 35.6705244918786 0 49.0812073596014 0 37.3097179381134 0
"969" "Lillsjölidtjärnen" 2015 258 32.4142792601606 0 43.3087148999228 0 53.2733941866484 0 NA NA NA NA NA NA
"970" "Lillsjölidtjärnen" 2015 259 30.0678893454555 0 40.2198832029285 0 51.2590000223489 0 NA NA NA NA NA NA
"971" "Lillsjölidtjärnen" 2015 260 26.4754287755219 0 34.570328695506 0 37.6317355343437 0 NA NA NA NA NA NA
"972" "Lillsjölidtjärnen" 2015 261 21.1615643633852 0 27.1092384104196 0 24.8999234804781 0 NA NA NA NA NA NA
"973" "Lillsjölidtjärnen" 2015 262 31.6566494245861 0 41.0237324321561 0 43.7677392619272 0 NA NA NA NA NA NA
"974" "Lillsjölidtjärnen" 2015 263 38.7187103154563 0 47.5020128736572 0 51.1815721599055 0 NA NA NA NA NA NA
"975" "Lillsjölidtjärnen" 2015 264 40.4641517511306 0 49.1479503971936 0 49.0670576924052 0 NA NA NA NA NA NA
"976" "Lillsjölidtjärnen" 2015 265 39.1582751926844 0 47.4817733012744 0 47.4389254372378 0 NA NA NA NA NA NA
"977" "Lillsjölidtjärnen" 2015 266 40.9205024230881 0 51.490635463264 0 50.7874014652109 0 NA NA NA NA NA NA
"978" "Lillsjölidtjärnen" 2015 267 40.3416749755774 0 50.3897392052965 0 49.7401872963867 0 NA NA NA NA NA NA
"979" "Lillsjölidtjärnen" 2015 268 39.9771817275059 0 52.1374466952532 0 61.9011421463725 0 NA NA NA NA NA NA
"980" "Lillsjölidtjärnen" 2015 269 49.606585171772 0 63.0984217624064 0 81.315689180844 0 NA NA NA NA NA NA
"981" "Lillsjölidtjärnen" 2015 270 57.0586831549006 0 74.6047119722516 0 89.479780383449 0 NA NA NA NA NA NA
"982" "Lillsjölidtjärnen" 2015 271 61.8538257228581 0 76.4569936181574 0 87.469063354815 0 67.179617106132 0 82.0840734320479 0 48.8957271607187 0
"983" "Lillsjölidtjärnen" 2015 272 62.3150920367554 0 77.9485960603976 0 83.7565044264599 0 NA NA NA NA NA NA
"984" "Lillsjölidtjärnen" 2015 273 65.4965410112733 0 84.8040321236034 0 98.2898507305129 0 NA NA NA NA NA NA
"987" "Struptjärn" 2012 153 55.8659265830624 8.49523118243591 80.8123080389406 15.0737041744425 106.483303036623 37.0151400622557 NA NA NA NA NA NA
"988" "Struptjärn" 2012 154 72.9982414724228 18.1893863322717 104.779015006774 23.3706065270391 159.994544259887 59.8967657990222 NA NA NA NA NA NA
"989" "Struptjärn" 2012 155 54.9895973469702 9.10411855681834 80.3971025828743 15.633481947353 98.1840303669128 38.382762689317 NA NA NA NA NA NA
"990" "Struptjärn" 2012 156 48.5845876691492 7.40051972771929 70.2496348585064 13.5274677830881 86.3295494980639 32.4547384305719 NA NA NA NA NA NA
"991" "Struptjärn" 2012 157 44.2328127469205 5.73809883986466 63.7282734410004 10.7224034441673 84.5199596924273 24.978993844984 NA NA NA NA NA NA
"992" "Struptjärn" 2012 158 35.8455931480039 3.61607529548678 50.8190595136271 7.97309112700481 63.6529232194194 18.3175968080188 NA NA NA NA NA NA
"993" "Struptjärn" 2012 159 43.453773954453 8.01247863633171 62.9184673210371 12.6372550745435 87.2974801158872 31.2285139584553 NA NA NA NA NA NA
"994" "Struptjärn" 2012 160 41.7475177616023 6.35849645812868 60.4410929107392 11.0354410254992 82.2644884166051 26.4638245262157 NA NA NA NA NA NA
"995" "Struptjärn" 2012 161 36.3199976280417 3.71348180076221 51.9360758570674 8.21601454948106 65.7444298313587 18.7068587295571 NA NA NA NA NA NA
"996" "Struptjärn" 2012 162 35.0340655416309 2.6162426149139 49.1719683224186 6.8928875335748 50.4422502215091 15.0963698714427 NA NA NA NA NA NA
"997" "Struptjärn" 2012 163 27.2298141958499 2.29535304085382 38.3608966047894 5.48615265144938 41.530194096827 12.5042538097262 NA NA NA NA NA NA
"998" "Struptjärn" 2012 164 30.2467644740219 5.08365523252619 43.6934751860333 8.52786325978025 56.7393516145951 21.2409421812214 NA NA NA NA NA NA
"999" "Struptjärn" 2012 165 31.0391308054388 5.84311241673377 45.3640115961137 9.54684244419146 59.8571359757655 23.5039293065633 39.5213246387312 9.61759265960767 56.9988031788136 13.8804253635337 64.7487127185448 38.1701636409887
"1000" "Struptjärn" 2012 166 28.8376702861218 4.70633947450665 41.4826530424041 7.7043755777932 51.7690129671226 18.889804506165 NA NA NA NA NA NA
"1001" "Struptjärn" 2012 167 34.1484869690378 6.95870706275822 49.6507418901972 10.2789887408426 69.6506945255243 25.4044749195793 NA NA NA NA NA NA
"1002" "Struptjärn" 2012 168 31.7100069885922 6.37302675793031 45.7184476820794 9.48269147640083 64.7569228704382 23.5157467284912 NA NA NA NA NA NA
"1003" "Struptjärn" 2012 169 28.4710411094382 3.1118710499077 40.8289933739322 6.76908341635073 50.1927213633637 15.1931338673963 NA NA NA NA NA NA
"1004" "Struptjärn" 2012 170 43.0759213091776 9.81167586349184 62.0471482543581 13.6987738789874 85.930826593588 34.5160637285058 NA NA NA NA NA NA
"1005" "Struptjärn" 2012 171 35.7029614834056 4.82811376340612 51.526645542003 9.43997805411196 64.3184890008771 21.8922190682149 NA NA NA NA NA NA
"1006" "Struptjärn" 2012 172 51.097609196714 12.8319296402176 73.5834369265738 16.4119920725406 112.635130626653 42.4742158393037 NA NA NA NA NA NA
"1007" "Struptjärn" 2012 173 55.9224806770341 13.0522537237088 80.8977581027198 17.1271249587801 124.680950211696 43.2652912348999 NA NA NA NA NA NA
"1008" "Struptjärn" 2012 174 47.6966343959119 8.66483953785209 70.163618441176 14.074574932648 100.072597363973 34.1474560876983 NA NA NA NA NA NA
"1009" "Struptjärn" 2012 175 44.6399564491574 8.68828913024509 64.8891185568881 13.145750830673 96.1687359270893 31.9056342645896 NA NA NA NA NA NA
"1010" "Struptjärn" 2012 176 39.5699724389398 6.57131068963632 56.9312443341097 10.97706326821 81.5547940559022 26.4977599568095 NA NA NA NA NA NA
"1011" "Struptjärn" 2012 177 37.3078125864513 6.0389287920738 53.6686474319926 10.3412071670969 75.2731008123686 24.7974337806341 NA NA NA NA NA NA
"1012" "Struptjärn" 2012 178 42.5877865270317 7.07138205388182 61.8509816738242 12.3560723171141 86.2032205907984 29.5332483447945 55.5590167089525 12.7147644849095 81.9755942860203 17.800104869572 101.659273655278 51.0411895294969
"1013" "Struptjärn" 2012 179 50.9549767557792 10.387649905701 74.5211891842078 15.2561538524141 111.344830551686 38.6129891881515 NA NA NA NA NA NA
"1014" "Struptjärn" 2012 180 47.828108036289 8.48251679825823 70.0456394831691 14.4602354578825 99.0980755160064 34.6667289906312 NA NA NA NA NA NA
"1015" "Struptjärn" 2012 181 50.0848353676324 10.0090755601278 72.0488615021384 14.827031370425 106.72518764385 36.2176769286138 NA NA NA NA NA NA
"1016" "Struptjärn" 2012 182 52.5350900487535 10.0010488096451 76.8641447599569 15.8931464375454 108.910594315082 38.4775213558167 NA NA NA NA NA NA
"1017" "Struptjärn" 2012 183 45.8009328561151 7.59854715084066 65.6895943464563 12.3692305611989 81.936739687923 30.3707898170134 NA NA NA NA NA NA
"1018" "Struptjärn" 2012 184 43.9947148957502 9.54337239396126 63.4277028549741 13.596071573308 94.1494651797779 34.0085562235863 NA NA NA NA NA NA
"1019" "Struptjärn" 2012 185 45.5115218247295 10.1584820254018 65.8273808144156 14.4647315224226 100.770912800821 35.6714540112018 NA NA NA NA NA NA
"1020" "Struptjärn" 2012 186 45.6327713689678 7.69601550753998 66.5071650089466 13.0314436507967 102.602345515352 30.8186696206181 NA NA NA NA NA NA
"1021" "Struptjärn" 2012 187 43.5350234569612 7.68897882506062 62.782931131479 12.2664192201705 95.8800651899292 29.1529565621115 NA NA NA NA NA NA
"1022" "Struptjärn" 2012 188 41.0237018190585 7.67905773849318 59.6034421947369 11.863002952827 89.8129179986964 27.9721588914699 NA NA NA NA NA NA
"1023" "Struptjärn" 2012 189 36.373697248449 4.54483484366436 52.4919583780316 8.97396257870944 72.3221534527718 20.263691332299 NA NA NA NA NA NA
"1024" "Struptjärn" 2012 190 40.6031403827529 5.3618973408615 58.5758069452461 10.5801390575923 73.0735930751219 24.9333243800559 NA NA NA NA NA NA
"1025" "Struptjärn" 2012 191 41.717805000104 7.90372881610934 61.5222767053586 12.6111268330513 83.8706887319828 30.9363184052126 NA NA NA NA NA NA
"1026" "Struptjärn" 2012 192 44.1820452542612 10.3730731377263 64.7187943014692 14.2407380686852 100.824138210327 35.7305798015039 42.38482177758 12.4948409047618 59.8963599091007 14.0596109541835 88.8245102147776 41.2320032909553
"1027" "Struptjärn" 2012 193 29.565431367422 4.20525677985827 43.2093725481369 7.93236070246028 55.6800995309615 18.2686217720239 NA NA NA NA NA NA
"1028" "Struptjärn" 2012 194 24.7109845525051 3.51193074251963 35.7350567790632 6.35277227040604 46.7452079656832 15.1640760768522 NA NA NA NA NA NA
"1029" "Struptjärn" 2012 195 20.3177323262656 2.2846898221512 29.4111084089414 4.99291313016252 36.7179525641532 10.9947022386247 NA NA NA NA NA NA
"1030" "Struptjärn" 2012 196 23.6258669614071 3.45267108923967 34.1810331849668 6.3730260583294 44.8291160641674 14.7160198350812 NA NA NA NA NA NA
"1031" "Struptjärn" 2012 197 22.7790353186657 3.48877041917621 32.9522898598948 6.48063016181345 44.1730076240126 14.6559139868511 NA NA NA NA NA NA
"1032" "Struptjärn" 2012 198 21.5802574579441 4.44348190962846 31.1938397140373 6.59621468584904 49.0195591298243 15.9189850620843 NA NA NA NA NA NA
"1033" "Struptjärn" 2012 199 22.6842506356426 4.76100535525097 33.2267897560425 7.00742189919067 51.5230997659367 16.8496130261028 NA NA NA NA NA NA
"1034" "Struptjärn" 2012 200 20.4207248496629 3.73077268749856 30.0090712983141 6.11352246616829 46.3694142241326 14.1303315557099 NA NA NA NA NA NA
"1035" "Struptjärn" 2012 201 14.0989855617246 2.08979760881594 20.5611470169428 3.87582617090724 30.5800646414288 8.66832394342882 NA NA NA NA NA NA
"1036" "Struptjärn" 2012 202 15.2316838801848 3.01681307304564 22.2333802957702 4.68477404122008 36.202337844087 10.9195508744542 NA NA NA NA NA NA
"1037" "Struptjärn" 2012 203 20.3861030596488 4.71678755610569 29.5079112007593 6.34723450290311 49.0277961347724 15.463471708881 NA NA NA NA NA NA
"1038" "Struptjärn" 2012 204 20.8904199332297 3.99093580817901 30.4267313936911 6.28612492485643 48.8251610900505 14.3669711709127 NA NA NA NA NA NA
"1039" "Struptjärn" 2012 205 19.5732534539794 3.61735053468996 28.2734475218723 5.87834134612849 42.1008181312755 13.6707727271671 NA NA NA NA NA NA
"1040" "Struptjärn" 2012 206 12.930371708217 1.81367840683007 18.4243858630446 3.40744731249933 27.6537186196884 7.24941258146131 10.9027588977652 2.22651666799405 15.8810404682084 3.60777297474804 16.389084897501 9.91590710835937
"1041" "Struptjärn" 2012 207 8.52892361591241 1.03501032453669 12.3668421337298 2.08203032091825 21.3776700231906 4.07510609216037 NA NA NA NA NA NA
"1042" "Struptjärn" 2012 208 12.4089563946376 2.09954790608585 17.9016523967888 3.08200588473704 27.4309977533351 7.59312944813587 NA NA NA NA NA NA
"1043" "Struptjärn" 2012 209 8.95148330622617 0 12.218847887443 0 22.8879543557926 0.317112497308377 NA NA NA NA NA NA
"1044" "Struptjärn" 2012 210 8.89978353997265 0 12.5265501320998 0 21.1229650568387 0.166401451938282 NA NA NA NA NA NA
"1045" "Struptjärn" 2012 211 9.89657639053824 0 14.5645647215834 0 20.2415348036613 0.273301977891769 NA NA NA NA NA NA
"1046" "Struptjärn" 2012 212 14.232598390549 0 20.6173030037802 0 25.8657609199036 0.491037282217733 NA NA NA NA NA NA
"1047" "Struptjärn" 2012 213 16.9965631427885 0 24.6499192752265 0 40.5848058813412 0.392735062334175 NA NA NA NA NA NA
"1048" "Struptjärn" 2012 214 18.6395554360076 0 26.8020322257335 0 39.3837649429381 0.378087527918128 NA NA NA NA NA NA
"1049" "Struptjärn" 2012 215 16.188189871426 0 22.4707231349941 0 37.4122257714547 0.401898524206637 NA NA NA NA NA NA
"1050" "Struptjärn" 2012 216 15.641904542015 0 21.1280209089014 0 31.0375284600456 0.399784808109532 NA NA NA NA NA NA
"1051" "Struptjärn" 2012 217 18.111605486288 0 23.9567874779592 0 30.4627765192804 0.57595400207662 NA NA NA NA NA NA
"1052" "Struptjärn" 2012 218 12.1823629657474 0 16.1128196191788 0 29.9408051587297 0.351278674986678 NA NA NA NA NA NA
"1053" "Struptjärn" 2012 219 6.50558609052957 0 8.58862331875184 0 16.8520808471525 0.255611299851745 NA NA NA NA NA NA
"1054" "Struptjärn" 2012 220 17.3105281450505 0 25.4549817101043 0 38.413282901277 0.464639403068122 23.5390973731712 0 36.3185828020336 0 40.046502056662 0.634513433162386
"1055" "Struptjärn" 2012 221 31.9937656474739 1.18745722800818 47.9758884602205 2.2395207002728 73.4499725418556 5.77259184103482 NA NA NA NA NA NA
"1056" "Struptjärn" 2012 222 24.7720010404368 2.46257390195024 35.0268899196772 5.42305524676667 53.6191295001375 11.120864236041 NA NA NA NA NA NA
"1057" "Struptjärn" 2012 223 20.2449362070355 2.33928478125516 28.909886206789 4.75976027650766 44.1601788712018 10.1546462520847 NA NA NA NA NA NA
"1058" "Struptjärn" 2012 224 12.5760997333333 1.90231501164304 18.3249965533915 3.36210456118299 26.9438971111233 7.80863250322589 NA NA NA NA NA NA
"1059" "Struptjärn" 2012 225 10.1902778106996 1.26514496422293 14.6652752383391 2.60397398887485 19.7973767117683 5.71856951504101 NA NA NA NA NA NA
"1060" "Struptjärn" 2012 226 9.89766181468256 1.48659732452818 13.9975185404878 2.45497678880157 22.2331300746158 5.58555918301616 NA NA NA NA NA NA
"1061" "Struptjärn" 2012 227 10.6311646012443 0.96569560076679 14.9552117400928 2.18693616527167 26.3627081301986 4.03891846593614 NA NA NA NA NA NA
"1062" "Struptjärn" 2012 228 6.42671908109767 0.352105257399829 8.83395004627674 1.03298388907748 18.0793963530838 1.4344864631899 NA NA NA NA NA NA
"1063" "Struptjärn" 2012 229 6.99628951076984 0.543616567713766 9.69579711758069 1.32633594461264 18.8468334006131 2.12139068779928 NA NA NA NA NA NA
"1064" "Struptjärn" 2012 230 6.0839907350736 0.477814844703825 8.54939357551325 1.21983624413316 16.8725635615706 1.82799521028644 NA NA NA NA NA NA
"1065" "Struptjärn" 2012 231 5.95728263127438 0.555368256390811 8.4746786985279 1.28702144407449 16.057336968788 2.13372923235038 NA NA NA NA NA NA
"1066" "Struptjärn" 2012 232 10.4767429592044 1.54725828579312 15.2106141219325 2.72216045947327 25.0371330838224 6.00181394091063 NA NA NA NA NA NA
"1067" "Struptjärn" 2012 233 17.6728727654156 2.70623448244778 25.450531209088 4.57319271954296 43.6435124498914 9.86238164641534 NA NA NA NA NA NA
"1068" "Struptjärn" 2012 234 22.5652134853403 3.85769428987731 32.3509229876559 6.19584661951675 49.6161114235341 14.6021820243742 32.0501563925783 8.8037561975771 45.8674840807528 10.5844618670089 66.0362003283911 30.7461208883322
"1069" "Struptjärn" 2012 235 24.4907934818078 3.76569823361045 35.2142296726928 6.52940885147549 54.0442477857985 14.5179086539043 NA NA NA NA NA NA
"1070" "Struptjärn" 2012 236 26.7273743698135 3.41004696546245 38.5787210453477 6.84094996400819 55.2104240733899 15.0321401489681 NA NA NA NA NA NA
"1071" "Struptjärn" 2012 237 26.7001830839367 2.51202502131051 37.8308867129474 5.75906775881388 56.3043489872328 12.0504795895494 NA NA NA NA NA NA
"1072" "Struptjärn" 2012 238 29.9155405843202 3.75356094092896 42.6495938277908 7.15706323560887 65.1029996856185 15.4107634852154 NA NA NA NA NA NA
"1073" "Struptjärn" 2012 239 30.9772228150723 4.6427438908468 44.3511942950563 7.85830270120977 69.2491119159247 17.6143151766399 NA NA NA NA NA NA
"1074" "Struptjärn" 2012 240 59.8662698355444 16.371846164828 84.8848394850634 19.6811126601152 152.915031089961 47.7588519820804 NA NA NA NA NA NA
"1075" "Struptjärn" 2012 241 58.4704207892702 9.02949526691489 84.4997404360869 16.5667906453045 117.605749808655 33.1536222213646 NA NA NA NA NA NA
"1076" "Struptjärn" 2012 242 65.6228945474669 12.1987843268687 95.8163650408336 20.1346228479892 135.474210553908 43.6108103457569 NA NA NA NA NA NA
"1077" "Struptjärn" 2012 243 59.3819141580925 9.74025164515767 86.6032731262963 17.7940463504825 103.777873479616 37.0219793638644 NA NA NA NA NA NA
"1078" "Struptjärn" 2012 244 55.8643371292459 6.65281170529324 79.385281321165 13.5889532187933 82.0819373689166 25.9499253964289 NA NA NA NA NA NA
"1079" "Struptjärn" 2012 245 54.107661489933 6.27297705099597 75.8741028716858 12.6585907469467 91.8646935362502 25.2411362200684 NA NA NA NA NA NA
"1080" "Struptjärn" 2012 246 62.7431908338347 10.3425899132069 90.9898667957486 18.5802395533685 115.174621707892 38.9617341428761 NA NA NA NA NA NA
"1081" "Struptjärn" 2012 247 57.6444169628322 10.5144887340978 82.8877166049083 17.2744492480759 125.381020509554 37.3184514929378 NA NA NA NA NA NA
"1082" "Struptjärn" 2012 248 72.2120987730621 13.7338829252473 103.491074457276 20.8796218536859 156.552824391063 47.1924184976524 NA NA NA NA NA NA
"1083" "Struptjärn" 2012 249 96.7332009847083 25.4632090227574 133.834643391704 29.6943707844427 230.963689924175 71.2277806054995 NA NA NA NA NA NA
"1084" "Struptjärn" 2012 250 105.19103736102 27.9369102014821 149.943290494443 34.3890204210813 249.988864185866 83.7013699662438 135.675548586643 41.1967417967117 184.986094857086 38.7596380135617 300.611335207258 111.725315305939
"1085" "Struptjärn" 2012 251 79.8958608704305 9.59554861070692 114.051099507312 19.4687681523483 179.490085213564 40.5991711181487 NA NA NA NA NA NA
"1086" "Struptjärn" 2012 252 93.6725632805468 18.0422142710509 136.36299158272 27.7854150508095 220.907159615526 63.7139635373375 NA NA NA NA NA NA
"1087" "Struptjärn" 2012 253 87.5977764809447 13.98540725146 127.494578444568 23.9573538744688 194.39598202972 52.805264032445 NA NA NA NA NA NA
"1088" "Struptjärn" 2012 254 86.8973582188297 13.5433685400448 124.655987318745 22.8455712612082 182.962291696565 52.0315968873175 NA NA NA NA NA NA
"1089" "Struptjärn" 2012 255 91.3112632591945 17.8933643293578 133.550339983637 25.961736202785 182.294116945962 61.3640488173469 NA NA NA NA NA NA
"1090" "Struptjärn" 2012 256 79.4680466629865 15.0541890699927 115.455191364594 23.8631472844885 154.406435008779 53.8401345401689 NA NA NA NA NA NA
"1091" "Struptjärn" 2012 257 73.1470532405512 10.7309303600657 105.323561292188 19.0337001783182 173.727978441893 40.601855317653 NA NA NA NA NA NA
"1092" "Struptjärn" 2012 258 88.0556267870308 18.9467254211145 128.2383541231 26.7983739941019 203.916983888346 63.2718805716189 NA NA NA NA NA NA
"1093" "Struptjärn" 2012 259 87.2322957196351 15.3019657940489 123.578762169455 22.7010533781464 190.946142362567 51.9934747313164 NA NA NA NA NA NA
"1094" "Struptjärn" 2012 260 81.1271733473593 13.0237282304918 117.90403388463 23.1093185135682 167.532615729183 50.8430982589952 97.5448693266456 24.1366492499328 142.460651718511 34.7178853043745 167.548677263534 96.7032734947609
"1095" "Struptjärn" 2012 261 79.9063034619736 11.9523912534703 114.160870386503 20.5293818712024 162.467715298294 45.7937441343656 NA NA NA NA NA NA
"1096" "Struptjärn" 2012 262 83.6846444278609 13.0155320579965 120.584623631609 22.475542161094 176.18907871352 49.5428197676501 NA NA NA NA NA NA
"1097" "Struptjärn" 2012 263 76.8577048641091 8.97482024106739 109.440093011329 18.269956029155 149.478887839367 38.6433802106555 NA NA NA NA NA NA
"1098" "Struptjärn" 2012 264 87.4588777177052 17.140738558415 126.135832218892 25.3474018868799 200.112620426489 57.1641299509571 NA NA NA NA NA NA
"1099" "Struptjärn" 2012 265 82.745470702094 14.3375437477572 120.286533274241 23.2948909906345 186.704164191222 51.5693720330961 NA NA NA NA NA NA
"1100" "Struptjärn" 2012 266 73.1294761775181 6.40440262414265 102.954165428896 15.2937127174626 155.83837561232 29.3546778434101 NA NA NA NA NA NA
"1101" "Struptjärn" 2012 267 80.5567330907748 12.2214860327806 116.10970077192 21.1216948698645 177.63401890549 45.8722152543995 NA NA NA NA NA NA
"1102" "Struptjärn" 2012 268 78.9260887321424 12.769311856622 113.601157086419 21.0841779417719 180.713905115992 45.5999569179083 NA NA NA NA NA NA
"1103" "Struptjärn" 2012 269 67.854618617578 9.7030013398086 97.7952003207361 18.8524808797631 141.136536396353 38.9600762876788 NA NA NA NA NA NA
"1104" "Struptjärn" 2012 270 62.7078817705366 5.99450112181879 89.418007877903 14.273968140772 121.773538057091 27.6522779560015 NA NA NA NA NA NA
"1105" "Struptjärn" 2012 271 61.7495912017021 6.0041491344055 89.4280981970153 12.2445997428561 115.511841025064 26.3764429696846 NA NA NA NA NA NA
"1106" "Struptjärn" 2012 272 56.7195721517823 0 78.0261472456531 0 101.652193196327 1.06627577077206 NA NA NA NA NA NA
"1107" "Struptjärn" 2012 273 56.3078985970286 0 77.2533808337101 0 93.8435810329184 0.774591977227798 NA NA NA NA NA NA
"1108" "Struptjärn" 2012 274 58.7519208769578 0 82.9619177460489 0 95.6140732081279 1.28019485774682 NA NA NA NA NA NA
"1110" "Struptjärn" 2013 152 33.6932959099161 0 46.9769406122765 0 63.4115326795328 0.780341657059886 NA NA NA NA NA NA
"1111" "Struptjärn" 2013 153 34.1125513936227 0 46.9615017963067 0 48.0660506922149 0.870938032015288 NA NA NA NA NA NA
"1112" "Struptjärn" 2013 154 40.5117324980507 0 58.7939597370412 0 81.8813832994792 0.700632325877302 NA NA NA NA NA NA
"1113" "Struptjärn" 2013 155 62.8724260525909 0 95.9148097624465 0 148.416597413345 1.33411041051151 103.485991251636 0 157.10453408091 0 243.375064905836 2.6999904184591
"1114" "Struptjärn" 2013 156 67.2746010849916 0 102.799001713377 0 145.284971893759 0.962101390718587 NA NA NA NA NA NA
"1115" "Struptjärn" 2013 157 55.0957767443152 0 81.6849896001646 0 97.252593393793 1.03863928446558 NA NA NA NA NA NA
"1116" "Struptjärn" 2013 158 48.7532653707368 0 69.3527019014827 0 87.41299998432 1.18008103348625 NA NA NA NA NA NA
"1117" "Struptjärn" 2013 159 48.6734203719641 0 70.9085003256376 0 87.7713993470603 0.982336589430007 NA NA NA NA NA NA
"1118" "Struptjärn" 2013 160 45.1787452509065 0 64.566260750429 0 83.400207386283 0.999258699509374 NA NA NA NA NA NA
"1119" "Struptjärn" 2013 161 47.5326211231004 0 70.7947030752785 0 90.4548193587562 1.13979015506516 NA NA NA NA NA NA
"1120" "Struptjärn" 2013 162 45.103309994691 0 66.7001631506141 0 84.5209062095822 0.995994533072256 NA NA NA NA NA NA
"1121" "Struptjärn" 2013 163 40.8121983372474 0 58.4459575261312 0 76.3587223094427 0.665728138848846 NA NA NA NA NA NA
"1122" "Struptjärn" 2013 164 38.3263131362619 0 54.9564336428928 0 73.8002698875099 0.681735410134678 NA NA NA NA NA NA
"1123" "Struptjärn" 2013 165 39.452203658123 0 57.6791426964743 0 73.6345427008198 0.733120083780386 NA NA NA NA NA NA
"1124" "Struptjärn" 2013 166 36.4673196301963 0 53.9484949985867 0 61.9095764364503 0.937519813646364 NA NA NA NA NA NA
"1125" "Struptjärn" 2013 167 36.378292277581 0 52.4527803972043 0 74.7006095991204 0.764106108323881 NA NA NA NA NA NA
"1126" "Struptjärn" 2013 168 34.0831289054621 0 48.6465133409209 0 61.4305491451144 0.728281180136489 NA NA NA NA NA NA
"1127" "Struptjärn" 2013 169 35.8103432743335 0.579895121097648 53.3825943818669 0.862081513868468 70.6163924044542 1.43066301474073 40.3111515665611 0 62.3070962617983 0 68.2266609110342 0.280357615241557
"1128" "Struptjärn" 2013 170 38.0655639412586 1.93789033444861 54.2469661016193 2.77258146910531 74.4811273555624 3.84721224522385 NA NA NA NA NA NA
"1129" "Struptjärn" 2013 171 36.7458938622749 1.86384507488511 54.7059189373185 2.78142698534595 65.8075391960711 3.60178017040727 NA NA NA NA NA NA
"1130" "Struptjärn" 2013 172 34.3773929111701 1.78143614864368 49.3445742654805 2.57162764089662 62.8492229107448 3.41188335405596 NA NA NA NA NA NA
"1131" "Struptjärn" 2013 173 37.4416362949486 1.86520461322565 54.7179209118193 2.70909587886591 77.7282826814636 3.99881385914101 NA NA NA NA NA NA
"1132" "Struptjärn" 2013 174 43.0330828508677 2.11481027007931 65.0195028159485 3.19514072056745 94.1003015172007 4.71538354690436 NA NA NA NA NA NA
"1133" "Struptjärn" 2013 175 39.5793655782381 1.88137778278678 57.5748582721712 2.71905552291176 84.7037693849444 4.16437704173166 NA NA NA NA NA NA
"1134" "Struptjärn" 2013 176 31.5885149450795 1.74167145484025 46.3532912885286 2.57012069856163 64.2068476903624 3.69257675744852 NA NA NA NA NA NA
"1135" "Struptjärn" 2013 177 35.13790145445 1.71915897823498 53.1454997200405 2.59029146073072 76.8680314079382 4.02996045602157 NA NA NA NA NA NA
"1136" "Struptjärn" 2013 178 33.6289282730155 1.94769908254641 51.3940073663438 2.97719790328582 66.7594518934162 4.07447861400901 NA NA NA NA NA NA
"1137" "Struptjärn" 2013 179 35.3901069139608 1.86039465902939 51.6766825081365 2.72115078163992 73.5417507583633 3.92206334102796 NA NA NA NA NA NA
"1138" "Struptjärn" 2013 180 27.5390319476176 1.41594935069151 38.9480521243541 1.99820701585234 43.49863596836 2.35025838049376 NA NA NA NA NA NA
"1139" "Struptjärn" 2013 181 24.1996992474295 1.23294176825742 33.4846721145548 1.7062556409305 35.4048694373556 2.0880516320148 NA NA NA NA NA NA
"1140" "Struptjärn" 2013 182 23.7195997550928 1.30106498180836 33.7995376343841 1.86118437879881 47.7059121412852 2.73472641664897 NA NA NA NA NA NA
"1141" "Struptjärn" 2013 183 25.9261239870905 1.48047834106535 38.8413023418255 2.21537489264311 55.9000755328992 3.32988566130161 13.8018215893007 0 20.372611205662 0 24.295860190583 0.60393156974323
"1142" "Struptjärn" 2013 184 39.3179510483855 1.70304427174026 57.2257739437973 2.48563154244263 92.1928157997279 4.13636590815709 NA NA NA NA NA NA
"1143" "Struptjärn" 2013 185 35.1417690934517 1.6308301448819 52.4681032384831 2.42378690765365 77.7472170478498 3.72462232159672 NA NA NA NA NA NA
"1144" "Struptjärn" 2013 186 34.6219607302913 1.85276157514764 51.5621439249728 2.75488183546086 72.0135450030231 3.96363858876299 NA NA NA NA NA NA
"1145" "Struptjärn" 2013 187 32.8623518966026 1.81161242158877 49.8567747629334 2.75315764994026 67.9129922065369 3.93912855138563 NA NA NA NA NA NA
"1146" "Struptjärn" 2013 188 31.9496757217615 1.55825054472669 46.7048954158848 2.26385225239773 69.1918277939838 3.72689356969662 NA NA NA NA NA NA
"1147" "Struptjärn" 2013 189 32.5529860243424 1.72815653667095 49.1880370531343 2.61440152415348 71.6069682889417 3.90567161198286 NA NA NA NA NA NA
"1148" "Struptjärn" 2013 190 31.3032745106703 1.4655220079721 46.3440617415634 2.1738749583972 63.8716653478682 3.32801856149961 NA NA NA NA NA NA
"1149" "Struptjärn" 2013 191 32.214293423645 1.41612710600737 48.1053307273443 2.11575680950584 64.8732516825757 2.97833074997423 NA NA NA NA NA NA
"1150" "Struptjärn" 2013 192 31.1741170941031 1.50181912290336 46.1800883714985 2.22043720704492 62.8323110076577 3.29055879484973 NA NA NA NA NA NA
"1151" "Struptjärn" 2013 193 29.8525870452027 1.5710671143359 44.0916696504925 2.31618163209043 57.3677530039442 3.24193722397587 NA NA NA NA NA NA
"1152" "Struptjärn" 2013 194 28.3747285181066 1.3224297359852 40.9547007900753 1.92053342073571 54.4349218936615 2.66851668382672 NA NA NA NA NA NA
"1153" "Struptjärn" 2013 195 27.9411879926824 1.32537274193215 41.4423674369749 1.96051302620004 55.6814809796557 2.87605984642109 NA NA NA NA NA NA
"1154" "Struptjärn" 2013 196 28.8723976095711 1.41445315996462 41.7889845218769 2.04195018949502 60.9370003427338 3.12328916776957 NA NA NA NA NA NA
"1155" "Struptjärn" 2013 197 37.5641179543305 1.70810667481417 57.5626787595615 2.62016965441884 85.8095526217441 3.97600892917092 41.0655971327408 0 63.3514567445398 0 82.8934402029284 1.52872293242374
"1156" "Struptjärn" 2013 198 33.5864541805458 1.37554434447516 50.8028385700048 2.07710541833424 65.4258117996812 2.8521949754644 NA NA NA NA NA NA
"1157" "Struptjärn" 2013 199 33.1750721568347 0.540596715865886 50.2234502949339 0.80235540138827 66.7776731874047 1.82714239987769 NA NA NA NA NA NA
"1158" "Struptjärn" 2013 200 36.6626452140449 0 56.004903580252 0 76.9177947546806 0.785673173395873 NA NA NA NA NA NA
"1159" "Struptjärn" 2013 201 33.4521957649858 0 49.5193494916388 0 58.4732645688762 0.901861936459013 NA NA NA NA NA NA
"1160" "Struptjärn" 2013 202 43.892478891688 0 67.3980857323207 0 94.5163090766505 1.01594034996896 NA NA NA NA NA NA
"1161" "Struptjärn" 2013 203 51.9790426862442 0 78.0076617529247 0 120.759019036042 1.01586735556752 NA NA NA NA NA NA
"1162" "Struptjärn" 2013 204 51.7940807136762 0 76.6591817508506 0 118.412109515871 1.20662537099053 NA NA NA NA NA NA
"1163" "Struptjärn" 2013 205 39.1127651810154 0 57.4434394563783 0 78.7186969594759 1.0038258330799 NA NA NA NA NA NA
"1164" "Struptjärn" 2013 206 25.1404232174245 0 35.6259900562223 0 53.513124449396 0.841367039020423 NA NA NA NA NA NA
"1165" "Struptjärn" 2013 207 14.1799904788339 0 20.051073232674 0 32.1054320799472 0.486146615846862 NA NA NA NA NA NA
"1166" "Struptjärn" 2013 208 20.1193720191854 0 29.2360745096803 0 48.7030535609841 0.575495503196086 NA NA NA NA NA NA
"1167" "Struptjärn" 2013 209 22.6018122660923 0 32.6443739772401 0 54.5278446487817 0.614083371173215 NA NA NA NA NA NA
"1168" "Struptjärn" 2013 210 28.6991783188775 0 42.9487515450596 0 70.7823293064545 1.04965836196364 NA NA NA NA NA NA
"1169" "Struptjärn" 2013 211 22.1186078310052 0 30.1226621271846 0 40.0552811150506 0.811748209196749 22.8433191108961 0 32.090194003351 0 17.3688223443768 0.130861803338508
"1170" "Struptjärn" 2013 212 40.2034900768349 0 60.0254127066822 0 94.6461400905857 0.781163033442328 NA NA NA NA NA NA
"1171" "Struptjärn" 2013 213 18.4887490223268 0 25.6226127622326 0 36.440011724081 0.430617384540889 NA NA NA NA NA NA
"1172" "Struptjärn" 2013 214 22.6022560510462 0 33.3570244243273 0 40.9472835124248 0.600724333058284 NA NA NA NA NA NA
"1173" "Struptjärn" 2013 215 22.326077855329 0 32.6194030228508 0 51.7894916688267 0.483857750331749 NA NA NA NA NA NA
"1174" "Struptjärn" 2013 216 27.1038650641339 0 39.8612763054037 0 62.4055179303878 0.593599121100261 NA NA NA NA NA NA
"1175" "Struptjärn" 2013 217 27.1542487421652 0 39.5409003537206 0 61.5900329505544 0.742724581380014 NA NA NA NA NA NA
"1176" "Struptjärn" 2013 218 34.7173852792953 0 50.5205011034957 0 84.9679987320182 0.631273806960164 NA NA NA NA NA NA
"1177" "Struptjärn" 2013 219 32.5831992737614 0 47.6355286597216 0 60.4186868291299 1.37743908343356 NA NA NA NA NA NA
"1178" "Struptjärn" 2013 220 38.1702344797062 0 55.9511978373493 0 76.9614054037734 1.07529313301939 NA NA NA NA NA NA
"1179" "Struptjärn" 2013 221 37.4903867471876 0 53.8635091463182 0 78.4210537005263 0.953096643265142 NA NA NA NA NA NA
"1180" "Struptjärn" 2013 222 35.0541677952366 0 46.4233804744657 0 65.3260766375762 0.73320994532575 NA NA NA NA NA NA
"1181" "Struptjärn" 2013 223 32.4715904071 0 43.8372318374893 0 61.8949331471359 0.573994010338575 NA NA NA NA NA NA
"1182" "Struptjärn" 2013 224 30.2522030202581 0 42.1217740075266 0 62.8509248569925 0.678703397269914 NA NA NA NA NA NA
"1183" "Struptjärn" 2013 225 29.5410408081669 0 40.5945868579519 0 59.7540262714196 0.695953152521379 28.7824299168554 0 41.6203064343054 0 41.1173836321093 1.21673163613923
"1184" "Struptjärn" 2013 226 38.7890745420398 0 55.2892080166061 0 83.5329269535593 0.686555949297383 NA NA NA NA NA NA
"1185" "Struptjärn" 2013 227 43.5466396093577 0 64.4985400387797 0 91.413283089 1.03919343042482 NA NA NA NA NA NA
"1186" "Struptjärn" 2013 228 43.3441704936618 0 61.2653646060297 0 100.644898346078 0.791207494324779 NA NA NA NA NA NA
"1187" "Struptjärn" 2013 229 38.5590544867211 0 56.7013538486729 0 85.293097465494 0.959146684833294 NA NA NA NA NA NA
"1188" "Struptjärn" 2013 230 50.8904342038642 0 72.7352293520913 0 122.69696895862 1.04202751049968 NA NA NA NA NA NA
"1189" "Struptjärn" 2013 231 40.7929762372559 0 60.5678954871396 0 82.5371656259554 0.882663233369093 NA NA NA NA NA NA
"1190" "Struptjärn" 2013 232 32.6502315454548 0 46.0403699697349 0 75.7678271757454 0.750497002556614 NA NA NA NA NA NA
"1191" "Struptjärn" 2013 233 27.3467395700828 0 37.8379288282424 0 64.7933858300353 3.15743401042377 NA NA NA NA NA NA
"1192" "Struptjärn" 2013 234 39.0643079899859 0 58.1199216284908 0 92.4807237549681 5.45537009411228 NA NA NA NA NA NA
"1193" "Struptjärn" 2013 235 44.0339153838366 0 62.0780678691853 0 96.135641548116 7.01328533802535 NA NA NA NA NA NA
"1194" "Struptjärn" 2013 236 34.8743630338652 0 49.3488484584541 0 79.8449900787583 3.31556929271523 NA NA NA NA NA NA
"1195" "Struptjärn" 2013 237 28.1760930446162 0 40.399671107901 0 60.6460870592823 2.83970850604932 NA NA NA NA NA NA
"1196" "Struptjärn" 2013 238 31.1966762111698 0 44.668013131727 0 68.6826563246448 1.8334573803813 NA NA NA NA NA NA
"1197" "Struptjärn" 2013 239 36.1203214038558 0 52.4144489378622 0 84.6079430319164 3.08095310735054 41.0153316552881 0 63.4514209861377 0 76.2855631055381 1.87173202560615
"1198" "Struptjärn" 2013 240 35.7886642957523 0 51.5206022699609 0 80.8213134323127 7.86332710487955 NA NA NA NA NA NA
"1199" "Struptjärn" 2013 241 39.2410916777586 0 57.3455639660979 0 88.5537688651022 9.2702056017714 NA NA NA NA NA NA
"1200" "Struptjärn" 2013 242 36.4764692373655 0 52.0675399716562 0 81.5881178538371 7.90657228266864 NA NA NA NA NA NA
"1201" "Struptjärn" 2013 243 39.5764777681472 0 55.5627053323958 0 87.0394082281018 9.42113929509449 NA NA NA NA NA NA
"1202" "Struptjärn" 2013 244 39.0450605568921 0 54.7443538353894 0 77.0380563179454 10.9564349152516 NA NA NA NA NA NA
"1203" "Struptjärn" 2013 245 39.0989543238236 3.37746388052134 53.2071882673278 4.58936793802809 65.9905763676623 11.8296061401164 NA NA NA NA NA NA
"1204" "Struptjärn" 2013 246 36.8126906071093 2.83265569639694 52.6748981683829 4.08388742526337 67.5003285105431 9.88354648980228 NA NA NA NA NA NA
"1205" "Struptjärn" 2013 247 33.8198826691644 3.21427995626089 46.7382264498896 4.43896359953865 66.1424548532771 11.3927696544333 NA NA NA NA NA NA
"1206" "Struptjärn" 2013 248 41.2730740852808 3.34265227254914 60.388526394388 4.88656299555668 96.8394843122762 11.6785437205156 NA NA NA NA NA NA
"1207" "Struptjärn" 2013 249 42.3395241516821 3.66844801160764 64.1267561996665 5.54297921441389 101.060788036479 11.0141634834905 NA NA NA NA NA NA
"1208" "Struptjärn" 2013 250 31.8949230233239 0 44.4294980045254 0 61.0586370461695 6.60761641441412 NA NA NA NA NA NA
"1209" "Struptjärn" 2013 251 21.5095159947503 0 28.5226519624871 0 40.4538294662769 4.74532353004462 NA NA NA NA NA NA
"1210" "Struptjärn" 2013 252 18.54247731724 0 25.5475348577618 0 34.9712656035527 3.85410085983023 NA NA NA NA NA NA
"1211" "Struptjärn" 2013 253 21.9973941436269 0 29.886481306865 0 42.5862576014084 4.94549509003601 19.7795079032916 0 27.1984420432705 0 15.436143990784 3.6752374920721
"1212" "Struptjärn" 2013 254 26.1434516929568 0 37.0039356665528 0 49.9908014806328 4.82410162251531 NA NA NA NA NA NA
"1213" "Struptjärn" 2013 255 25.8672270261949 0 35.9338856112635 0 54.4536929779308 5.38148454719766 NA NA NA NA NA NA
"1214" "Struptjärn" 2013 256 41.5739884022966 0 61.3839475115253 0 97.3230184681737 5.88389850937522 NA NA NA NA NA NA
"1215" "Struptjärn" 2013 257 48.1536317516557 0 69.0146262369689 0 111.033374578192 8.00231804001885 NA NA NA NA NA NA
"1216" "Struptjärn" 2013 258 64.7727465357765 0 96.0289721608397 0 155.661241433694 8.9782891333572 NA NA NA NA NA NA
"1217" "Struptjärn" 2013 259 53.6594289253145 0 80.0187237606461 0 109.195096728579 13.2934299348914 NA NA NA NA NA NA
"1218" "Struptjärn" 2013 260 54.0864999687983 0 79.0578924026051 0 102.971740835826 19.3601973953433 NA NA NA NA NA NA
"1219" "Struptjärn" 2013 261 55.7686983899085 0 83.1770604278995 0 104.714928221136 16.7495156743341 NA NA NA NA NA NA
"1220" "Struptjärn" 2013 262 53.9528940180296 0 80.6356101262388 0 99.8047955627311 19.5020381515554 NA NA NA NA NA NA
"1221" "Struptjärn" 2013 263 53.7669216871813 0 79.3884588111986 0 99.5016727260967 20.3692660333449 NA NA NA NA NA NA
"1222" "Struptjärn" 2013 264 52.6904519616161 0 73.7110904140096 0 103.177526468562 20.7015153950991 NA NA NA NA NA NA
"1223" "Struptjärn" 2013 265 65.2241154800403 0 96.4010075248448 0 145.537643643343 27.9455966735825 NA NA NA NA NA NA
"1224" "Struptjärn" 2013 266 81.1326609009789 0 124.019481239155 0 191.121177113637 35.3773629636996 NA NA NA NA NA NA
"1225" "Struptjärn" 2013 267 104.479224894088 0 155.078953507808 0 265.754767364885 48.9891569198761 135.244716136231 0 199.403202961443 0 341.773930770487 36.4112176609084
"1226" "Struptjärn" 2013 268 104.916091727528 0 154.192632875752 0 259.026400389712 58.4311177028248 NA NA NA NA NA NA
"1227" "Struptjärn" 2013 269 94.0372084521199 0 142.367971603023 0 224.377789023535 61.6864119938555 NA NA NA NA NA NA
"1228" "Struptjärn" 2013 270 89.4266656912385 0 136.846092661458 0 215.750372990285 47.6057128200561 NA NA NA NA NA NA
"1229" "Struptjärn" 2013 271 73.2805094718477 0 108.382915353868 0 149.406922574045 37.9339672850895 NA NA NA NA NA NA
"1230" "Struptjärn" 2013 272 62.9244431986094 0 81.1764672283463 0 103.100994691761 49.1870602143072 NA NA NA NA NA NA
"1231" "Struptjärn" 2013 273 62.1045226281203 0 78.3179432844881 0 101.256436507487 51.4053320326492 NA NA NA NA NA NA
"1234" "Struptjärn" 2014 152 49.1317686006042 0 73.0807522336641 0 83.4908459226791 1.04659648880264 NA NA NA NA NA NA
"1235" "Struptjärn" 2014 153 49.3464138812078 0 72.4072646201694 0 101.638275645092 0.87467606715707 NA NA NA NA NA NA
"1236" "Struptjärn" 2014 154 38.2942543712243 0 53.9874208533667 0 75.2024356870275 0.789048922427677 NA NA NA NA NA NA
"1237" "Struptjärn" 2014 155 33.042250807858 0 46.1965990580148 0 53.6308521360563 1.08569493867473 NA NA NA NA NA NA
"1238" "Struptjärn" 2014 156 30.2895137729317 0 42.2226081941438 0 46.185855819157 0.708118317844537 NA NA NA NA NA NA
"1239" "Struptjärn" 2014 157 40.1861927544783 0 59.0292828000043 0 80.7815970926503 0.798322507205771 NA NA NA NA NA NA
"1240" "Struptjärn" 2014 158 33.0735088938352 0 47.619189672676 0 61.1914244050418 0.392998029851153 NA NA NA NA NA NA
"1241" "Struptjärn" 2014 159 30.1239709012681 0 43.1884310161775 0 48.5902017847218 0.730371360224709 NA NA NA NA NA NA
"1242" "Struptjärn" 2014 160 34.7495510595362 0 48.3257003746682 0 55.6872018167999 0.962268225232123 NA NA NA NA NA NA
"1243" "Struptjärn" 2014 161 35.1748185698388 0 49.9174058669272 0 53.516662713743 0.719384190548241 43.8394548646178 0 64.9349505184554 0 49.5601863294097 0.107848554147132
"1244" "Struptjärn" 2014 162 42.2368848151459 0 62.7248792732981 0 89.1926692617875 0.9020991113647 NA NA NA NA NA NA
"1245" "Struptjärn" 2014 163 39.9777935260005 0 59.0576051430655 0 70.865106365791 0.681800622516912 NA NA NA NA NA NA
"1246" "Struptjärn" 2014 164 60.8851988273276 0 87.9277721323815 0 143.014643461113 1.05749211619564 NA NA NA NA NA NA
"1247" "Struptjärn" 2014 165 48.3258955936574 0 71.8478416051857 0 103.415667884831 0.740980440446189 NA NA NA NA NA NA
"1248" "Struptjärn" 2014 166 41.5476687488029 0 60.3870005152756 0 84.2361908279732 0.743964554795761 NA NA NA NA NA NA
"1249" "Struptjärn" 2014 167 46.6040034846518 0 70.0178685263853 0 106.744309241386 0.872732150151619 NA NA NA NA NA NA
"1250" "Struptjärn" 2014 168 43.739533119755 0 65.2039483234116 0 85.6516914897458 0.778519136289668 NA NA NA NA NA NA
"1251" "Struptjärn" 2014 169 49.2206868149839 0 75.4290213412397 0 100.031926749577 0.774122487450776 NA NA NA NA NA NA
"1252" "Struptjärn" 2014 170 42.6372443886517 0 63.5093879623233 0 81.6211938274752 0.871167762503228 NA NA NA NA NA NA
"1253" "Struptjärn" 2014 171 38.3501657686562 0 54.855996154046 0 74.3991585052261 0.872187101071205 NA NA NA NA NA NA
"1254" "Struptjärn" 2014 172 35.8368015062553 0 52.4404464531018 0 66.6514515981937 0.583835269448881 NA NA NA NA NA NA
"1255" "Struptjärn" 2014 173 32.4205579567266 0 46.8908022586989 0 62.3554357884445 0.33565680663074 NA NA NA NA NA NA
"1256" "Struptjärn" 2014 174 43.0426302760459 0 63.8684681290657 0 95.8340538490226 0.52936058856692 NA NA NA NA NA NA
"1257" "Struptjärn" 2014 175 39.5749484436467 0 59.3536755584832 0 81.0365945044988 0.70160307273969 49.5934311217095 0 76.2230375875706 0 97.5422271730345 0.0327394558689547
"1258" "Struptjärn" 2014 176 36.8110736881655 0 53.1467567233276 0 81.9269705148664 0.626645643265853 NA NA NA NA NA NA
"1259" "Struptjärn" 2014 177 29.5424069421618 0 41.5567362226427 0 54.1895152918199 0.409622905845111 NA NA NA NA NA NA
"1260" "Struptjärn" 2014 178 23.6720809876664 0 33.0324875183964 0 45.8225412165838 0.434512774959902 NA NA NA NA NA NA
"1261" "Struptjärn" 2014 179 16.706620064572 0 23.8876985362321 0 32.6871544195153 0.316959352908653 NA NA NA NA NA NA
"1262" "Struptjärn" 2014 180 13.0463032612547 0 18.8206707588912 0 27.3924919587973 0.23109079137355 NA NA NA NA NA NA
"1263" "Struptjärn" 2014 181 15.8375333290773 0 22.9046821851266 0 30.2602293747641 0.364757747068724 NA NA NA NA NA NA
"1264" "Struptjärn" 2014 182 11.2060304617584 0 15.7267241287444 0 21.0295238076557 0.378735018779208 NA NA NA NA NA NA
"1265" "Struptjärn" 2014 183 19.5553989438357 0 28.2118104890808 0 40.5200674053028 0.367754353168032 NA NA NA NA NA NA
"1266" "Struptjärn" 2014 184 19.2653761788682 0 28.8928364458397 0 34.6819594669908 0.354752468096511 NA NA NA NA NA NA
"1267" "Struptjärn" 2014 185 17.7038208666803 0 25.8959788488204 0 32.0158796328149 0.323697116605192 NA NA NA NA NA NA
"1268" "Struptjärn" 2014 186 17.1436394877047 0 24.6307038054624 0 38.0382309428641 0.312465489874332 NA NA NA NA NA NA
"1269" "Struptjärn" 2014 187 19.5781222350101 0 28.010228110948 0 43.8471656067311 0.399691775955306 NA NA NA NA NA NA
"1270" "Struptjärn" 2014 188 16.652406556692 0 23.5551105385259 0 32.7286725802139 0.412202958447998 NA NA NA NA NA NA
"1271" "Struptjärn" 2014 189 10.9923833486427 0 15.1090796704177 0 19.5314198691962 0.296165517896961 10.3270401246232 0 15.3368649076457 0 11.30279730986 0.0971202040182858
"1272" "Struptjärn" 2014 190 8.58502253705267 0 12.2519899456703 0 15.7870836465406 0.256051114407869 NA NA NA NA NA NA
"1273" "Struptjärn" 2014 191 12.3408619413078 0 17.7713516778498 0 24.3204654476919 0.323474046015877 NA NA NA NA NA NA
"1274" "Struptjärn" 2014 192 17.9215659553856 0 25.7947232190742 0 39.39627527199 0.359537281647055 NA NA NA NA NA NA
"1275" "Struptjärn" 2014 193 26.3758428102782 0 39.1729347746148 0 61.6135306560034 0.490933953406792 NA NA NA NA NA NA
"1276" "Struptjärn" 2014 194 18.9030963303807 0 26.2673772245905 0 37.0155209771305 0.502117471733506 NA NA NA NA NA NA
"1277" "Struptjärn" 2014 195 19.0495626708015 0 28.4697290534784 0 36.1405467548473 0.532239803473524 NA NA NA NA NA NA
"1278" "Struptjärn" 2014 196 19.0212858504259 0 27.7679285537413 0 35.8150477342485 0.553983816319834 NA NA NA NA NA NA
"1279" "Struptjärn" 2014 197 23.4393439822774 0 33.510260405676 0 42.9049005321474 0.618401618313777 NA NA NA NA NA NA
"1280" "Struptjärn" 2014 198 21.3631717834933 0 30.1928753547042 0 38.8839408393415 0.59324732660013 NA NA NA NA NA NA
"1281" "Struptjärn" 2014 199 16.5939191940062 0 22.9401824055617 0 29.6361086282891 0.378895891962995 NA NA NA NA NA NA
"1282" "Struptjärn" 2014 200 20.4532999001409 2.00654741170742 28.3003753239203 2.87021151700683 38.6146188018373 3.4691889659874 NA NA NA NA NA NA
"1283" "Struptjärn" 2014 201 19.9093573894131 2.71932241710841 27.4273823906666 3.74434701177613 37.8481210816702 5.26338190054597 NA NA NA NA NA NA
"1284" "Struptjärn" 2014 202 18.8653729417247 2.41203936823355 26.2825257158712 3.35511557725036 35.8380969327058 4.7002557560909 NA NA NA NA NA NA
"1285" "Struptjärn" 2014 203 17.2376966111362 2.34296721944255 23.3592934320187 3.16496799635858 30.5563239802444 4.2279580390962 5.36754332685332 0 7.90517528720264 0 5.39056214058531 0.0217757832867025
"1286" "Struptjärn" 2014 204 18.6820486383295 1.44963981158574 26.4442206613265 1.97029318674437 34.8039349856896 3.1923327544582 NA NA NA NA NA NA
"1287" "Struptjärn" 2014 205 18.0189598742762 0 25.5713590938469 0 33.8108578985067 0.678794900057082 NA NA NA NA NA NA
"1288" "Struptjärn" 2014 206 13.7982040866673 0 19.3427011213772 0 23.3374679301863 0.579598964268405 NA NA NA NA NA NA
"1289" "Struptjärn" 2014 207 9.89801341905036 0 13.8277979612679 0 18.5000942950427 0.390826274830648 NA NA NA NA NA NA
"1290" "Struptjärn" 2014 208 14.8012917364509 0 21.3654182081576 0 31.5681040784028 0.524071152593685 NA NA NA NA NA NA
"1291" "Struptjärn" 2014 209 20.6008930902787 0 29.2503701116359 0 37.1969826634144 0.527311148912682 NA NA NA NA NA NA
"1292" "Struptjärn" 2014 210 30.1970203329433 0 44.372428520054 0 59.6875532311169 0.706907773250288 NA NA NA NA NA NA
"1293" "Struptjärn" 2014 211 27.217410775741 0 39.9847982545434 0 52.9825082375131 0.829518812086037 NA NA NA NA NA NA
"1294" "Struptjärn" 2014 212 32.5283638280083 0 48.6061040026144 0 67.4634308356351 0.943648787725782 NA NA NA NA NA NA
"1295" "Struptjärn" 2014 213 29.5404741727469 0 40.8860678242991 0 63.6635802581179 0.815904042305384 NA NA NA NA NA NA
"1296" "Struptjärn" 2014 214 33.5563454959832 0 47.331589469064 0 73.0744767217138 0.607103225216498 NA NA NA NA NA NA
"1297" "Struptjärn" 2014 215 33.3221025652292 0 48.0316895209286 0 71.8776189045627 0.811987647962777 NA NA NA NA NA NA
"1298" "Struptjärn" 2014 216 32.2622857329779 0 46.6348262535334 0 68.748052828144 0.895134709311632 NA NA NA NA NA NA
"1299" "Struptjärn" 2014 217 28.5267393445212 0 40.6830387789797 0 63.6379495206772 0.679283288544438 22.6680923455808 0 34.1827810302996 0 46.2281505103534 0.0927515753083017
"1300" "Struptjärn" 2014 218 24.5597357471803 0 34.1829820216798 0 54.0809268930496 0.625135445480399 NA NA NA NA NA NA
"1301" "Struptjärn" 2014 219 26.791408448035 0 37.5022944311651 0 58.834810722429 0.613181795497762 NA NA NA NA NA NA
"1302" "Struptjärn" 2014 220 22.3078976604339 0 30.0494888986997 0 41.1860375900345 0.476270416220593 NA NA NA NA NA NA
"1303" "Struptjärn" 2014 221 23.1864790774907 0 32.3390427016861 0 46.4058032690643 0.534757837204661 NA NA NA NA NA NA
"1304" "Struptjärn" 2014 222 25.009115989682 0 34.2846115849506 0 49.8305297910302 0.473956217786864 NA NA NA NA NA NA
"1305" "Struptjärn" 2014 223 24.3478822552019 0 33.9652322090847 0 47.7761029947428 0.828336972192529 NA NA NA NA NA NA
"1306" "Struptjärn" 2014 224 25.9557033611596 0 38.7374857269012 0 55.0603103592204 0.693600454798022 NA NA NA NA NA NA
"1307" "Struptjärn" 2014 225 31.0145963118032 0 44.497368935547 0 72.9622047364483 0.848245775463373 NA NA NA NA NA NA
"1308" "Struptjärn" 2014 226 34.6531817857132 0 49.0722976776355 0 83.6338797000384 0.804743740620565 NA NA NA NA NA NA
"1309" "Struptjärn" 2014 227 34.7455569985694 0 48.6716084563107 0 73.2788317414206 0.797863895862583 NA NA NA NA NA NA
"1310" "Struptjärn" 2014 228 36.7192735171192 0 51.6645183317171 0 78.4055874777271 0.778000785196053 NA NA NA NA NA NA
"1311" "Struptjärn" 2014 229 36.776090226457 0 50.3808863508745 0 83.0423648831684 0.657825334562345 NA NA NA NA NA NA
"1312" "Struptjärn" 2014 230 36.4424549794206 0 53.4686347634104 0 77.8790454203899 1.133830673012 NA NA NA NA NA NA
"1313" "Struptjärn" 2014 231 31.1174095838696 0 41.2841858970046 0 56.7893821954043 0.488417277104799 33.1340894284854 0 47.4615099453225 0 28.2473266448305 0.011708221570259
"1314" "Struptjärn" 2014 232 27.4856730402111 0 36.7061859519004 0 45.5320549689717 0.795932425919515 NA NA NA NA NA NA
"1315" "Struptjärn" 2014 233 29.1204753761867 0 37.8641134300878 0 46.0871900716613 0.592731095076904 NA NA NA NA NA NA
"1316" "Struptjärn" 2014 234 30.8846061316156 0 42.4350155227763 0 50.4379625800996 0.6647359234153 NA NA NA NA NA NA
"1317" "Struptjärn" 2014 235 32.6642551751921 0 44.5808032744524 0 61.343888528306 0.575271406755283 NA NA NA NA NA NA
"1318" "Struptjärn" 2014 236 33.2401802794597 0 46.5413787172183 0 66.1031148481375 0.703115688191963 NA NA NA NA NA NA
"1319" "Struptjärn" 2014 237 35.9319621538326 0 49.1400814445771 0 66.094241845086 0.455780851555759 NA NA NA NA NA NA
"1320" "Struptjärn" 2014 238 54.9307932005161 0 81.1951166321595 0 124.046940073795 0.827480541498627 NA NA NA NA NA NA
"1321" "Struptjärn" 2014 239 64.5779155111932 0 97.4861917358455 0 140.519265608949 1.54662587944442 NA NA NA NA NA NA
"1322" "Struptjärn" 2014 240 67.9370066391921 0 103.174268765058 0 148.738693609967 2.3013150478288 NA NA NA NA NA NA
"1323" "Struptjärn" 2014 241 60.6669764152181 0 89.9934770212508 0 121.709041511394 1.1967419715646 NA NA NA NA NA NA
"1324" "Struptjärn" 2014 242 46.6842494517244 0 61.9117775528803 0 88.4477110142158 0.997709569831294 NA NA NA NA NA NA
"1325" "Struptjärn" 2014 243 48.3313278902775 0 65.7391465228978 0 103.60632281277 0.729284592557145 NA NA NA NA NA NA
"1326" "Struptjärn" 2014 244 51.4001447379928 0 71.9552489847821 0 111.026381399775 0.944098068173947 NA NA NA NA NA NA
"1327" "Struptjärn" 2014 245 44.8081158295259 0 60.1230394908135 0 93.2694371028999 0.705963733192136 53.8654697217748 0 81.2964712308349 0 65.840015244133 0.0995797494239326
"1328" "Struptjärn" 2014 246 34.712638333794 0 48.8458232802089 0 68.5806732646062 0.704398493323024 NA NA NA NA NA NA
"1329" "Struptjärn" 2014 247 36.4822797611532 3.82516142642618 48.8729180939133 5.18685703304974 76.9448341151544 7.9210868462778 NA NA NA NA NA NA
"1330" "Struptjärn" 2014 248 30.750156909913 2.99338116664021 41.8508922473985 4.09861411080934 55.3275007066964 5.33541193275373 NA NA NA NA NA NA
"1331" "Struptjärn" 2014 249 31.4186908817275 2.98545344307843 41.5242721959977 3.94706120517027 67.7524595839874 6.59031910834776 NA NA NA NA NA NA
"1332" "Struptjärn" 2014 250 39.1517724450654 4.18843663133286 54.9820593463699 5.89030777739879 86.331379176626 9.08860919242315 NA NA NA NA NA NA
"1333" "Struptjärn" 2014 251 41.5774381964615 3.74352641811601 55.2572492542133 4.98568276665268 80.0486607057028 7.13239298518053 NA NA NA NA NA NA
"1334" "Struptjärn" 2014 252 28.8907483400937 0 36.8832856970922 0 45.9127963329916 0.357440629006033 NA NA NA NA NA NA
"1335" "Struptjärn" 2014 253 32.6054796302119 0 46.5383964146314 0 60.5390780010166 0.848486896624613 NA NA NA NA NA NA
"1336" "Struptjärn" 2014 254 32.4367186112321 0 44.7652758855734 0 65.8422264578049 0.704846214343635 NA NA NA NA NA NA
"1337" "Struptjärn" 2014 255 31.6381756000372 0 43.842973702204 0 59.7180038239104 0.95171535003995 NA NA NA NA NA NA
"1338" "Struptjärn" 2014 256 35.4529235738724 0 47.8822961457435 0 78.3386189143505 0.535133424380459 NA NA NA NA NA NA
"1339" "Struptjärn" 2014 257 36.4548615287195 0 50.3141367712558 0 73.2939149448844 0.656253124997723 NA NA NA NA NA NA
"1340" "Struptjärn" 2014 258 38.5795557441151 0 51.3911862765465 0 81.4319836217197 0.611756709681599 NA NA NA NA NA NA
"1341" "Struptjärn" 2014 259 41.2290634474195 0 55.8755642601554 0 83.6091149989727 0.587939595205125 44.2142041501486 0 65.7592435885727 0 50.6822567940731 0.074213120972997
"1342" "Struptjärn" 2014 260 37.0446637979135 0 49.8211937728215 0 62.9446752800921 0.964384403723976 NA NA NA NA NA NA
"1343" "Struptjärn" 2014 261 37.8903550334985 0 51.9556633479457 0 72.2355904932264 0.514383649635179 NA NA NA NA NA NA
"1344" "Struptjärn" 2014 262 34.8861079593708 0 47.7841358134102 0 66.9889197806758 0.526050401022751 NA NA NA NA NA NA
"1345" "Struptjärn" 2014 263 33.8479615778642 0 46.3496768465476 0 68.3844227745923 0.495542434751433 NA NA NA NA NA NA
"1346" "Struptjärn" 2014 264 40.0325293817807 0 55.9968573200534 0 80.8173600413576 0.485672297367378 NA NA NA NA NA NA
"1347" "Struptjärn" 2014 265 55.0078750292197 0 79.0861391526212 0 127.984541084556 1.10106257537991 NA NA NA NA NA NA
"1348" "Struptjärn" 2014 266 76.533088642111 0 109.88865065718 0 189.811986511131 1.05159599343223 NA NA NA NA NA NA
"1349" "Struptjärn" 2014 267 84.7956243317835 0 120.447656577846 0 205.517011848547 1.5969150685355 NA NA NA NA NA NA
"1350" "Struptjärn" 2014 268 75.056666516287 0 103.108777790593 0 185.0384299562 1.12307614611776 NA NA NA NA NA NA
"1351" "Struptjärn" 2014 269 94.1912039325834 0 132.866976229154 0 221.99491551894 1.08017784985055 NA NA NA NA NA NA
"1352" "Struptjärn" 2014 270 78.2095516977576 0 114.669567731272 0 174.817264106874 1.19454902495975 NA NA NA NA NA NA
"1353" "Struptjärn" 2014 271 66.2922824240028 0 99.6064612262777 0 122.918809076305 1.17206077253093 NA NA NA NA NA NA
"1354" "Struptjärn" 2014 272 74.1547311382643 0 112.293934420622 0 164.932680389488 1.29842496237965 NA NA NA NA NA NA
"1355" "Struptjärn" 2014 273 56.8206192606704 0 83.175820999372 0 113.994503567825 1.21456187447384 67.0875249324164 0 103.566475305813 0 123.997843840256 0.959369496729535
"1358" "Struptjärn" 2015 152 74.2630002654524 0 106.669194953751 0 174.023280312059 1.74353434001625 NA NA NA NA NA NA
"1359" "Struptjärn" 2015 153 71.7829388426986 0 103.674795928994 0 165.28700629051 0.990718708257458 NA NA NA NA NA NA
"1360" "Struptjärn" 2015 154 45.8600522409466 0 67.87866512278 0 80.3971989473116 0.743915479545865 NA NA NA NA NA NA
"1361" "Struptjärn" 2015 155 57.8486999040926 0 87.3288595347583 0 130.491936326986 1.05802212760853 NA NA NA NA NA NA
"1362" "Struptjärn" 2015 156 52.8413654409088 0 79.7861065116902 0 112.466814319485 1.08424065296239 NA NA NA NA NA NA
"1363" "Struptjärn" 2015 157 47.7420237154072 0 67.2044295640138 0 104.190518938316 1.17095137013805 NA NA NA NA NA NA
"1364" "Struptjärn" 2015 158 47.1036261308172 0 71.5284997263462 0 96.0846517607187 1.30497910294126 NA NA NA NA NA NA
"1365" "Struptjärn" 2015 159 47.8713230235182 0 72.7160570194485 0 96.4430365901266 1.08687375550414 NA NA NA NA NA NA
"1366" "Struptjärn" 2015 160 46.8019275244339 0 70.1216988808326 0 94.7686673575643 1.11330897545849 56.7636220295993 0 87.3497863078141 0 109.233066946271 0.213715241118018
"1367" "Struptjärn" 2015 161 45.28523716764 0 67.5955085449697 0 96.0605171852114 1.13565572272628 NA NA NA NA NA NA
"1368" "Struptjärn" 2015 162 50.0246924096983 0 76.8938939866885 0 111.883505742152 0.870333389998319 NA NA NA NA NA NA
"1369" "Struptjärn" 2015 163 37.7357417818031 0 54.7640672807012 0 76.9233161524353 1.02513236133222 NA NA NA NA NA NA
"1370" "Struptjärn" 2015 164 32.3975236887814 0 47.6776341718469 0 67.9696101988407 0.741606898439135 NA NA NA NA NA NA
"1371" "Struptjärn" 2015 165 30.5188082066397 0 42.0403394486922 0 53.4339853537515 0.715315454209304 NA NA NA NA NA NA
"1372" "Struptjärn" 2015 166 37.9065276170909 0 57.492829755571 0 81.6993799300826 0.73650843675465 NA NA NA NA NA NA
"1373" "Struptjärn" 2015 167 44.6011107897726 0 68.2422699811843 0 101.495569557484 0.663025468729089 NA NA NA NA NA NA
"1374" "Struptjärn" 2015 168 37.931088837941 0 56.9923627698811 0 72.7143759864682 0.75486063735222 NA NA NA NA NA NA
"1375" "Struptjärn" 2015 169 28.0565401069803 0 39.2697349915638 0 51.9869658061702 0.598146098763348 NA NA NA NA NA NA
"1376" "Struptjärn" 2015 170 27.9712063003044 0 41.132476266082 0 53.6411254228714 0.474429332609932 NA NA NA NA NA NA
"1377" "Struptjärn" 2015 171 20.0304380895453 0 27.7773604833565 0 36.0372211803671 0.457081705534298 NA NA NA NA NA NA
"1378" "Struptjärn" 2015 172 18.2664543842258 0 26.5446261136011 0 36.6090453191128 0.336203470205349 NA NA NA NA NA NA
"1379" "Struptjärn" 2015 173 11.3175032469789 0 16.2467748307508 0 22.1873108620884 0.22637736014446 NA NA NA NA NA NA
"1380" "Struptjärn" 2015 174 13.3002102985304 0 19.8076950875188 0 27.8602875060104 0.413155139697519 11.3482390668635 0 16.5633901787693 0 11.4032849021694 0.00279449945327279
"1381" "Struptjärn" 2015 175 16.1593878641944 0 23.379107348312 0 35.9713255739363 0.452050859953837 NA NA NA NA NA NA
"1382" "Struptjärn" 2015 176 24.2518224055579 0 36.921752569728 0 52.9203732271361 0.790753825941899 NA NA NA NA NA NA
"1383" "Struptjärn" 2015 177 21.7662649508336 0 31.6773768670285 0 36.6936713219302 0.65495935625594 NA NA NA NA NA NA
"1384" "Struptjärn" 2015 178 26.3181578122604 0 39.313037031863 0 50.627234669107 0.727820703206564 NA NA NA NA NA NA
"1385" "Struptjärn" 2015 179 17.491933687567 0 24.7799335706361 0 33.6721008044986 0.457347195176922 NA NA NA NA NA NA
"1386" "Struptjärn" 2015 180 9.99233641364988 0 14.3249424830711 0 16.1715009186956 0.139830224162244 NA NA NA NA NA NA
"1387" "Struptjärn" 2015 181 20.312795701189 0 29.9386290257351 0 37.941858884564 0.310395660455307 NA NA NA NA NA NA
"1388" "Struptjärn" 2015 182 16.1606329978714 0 22.8684315114008 0 27.2511776438983 0.377223629048234 NA NA NA NA NA NA
"1389" "Struptjärn" 2015 183 8.0628580276909 0 11.3908625756783 0 13.7772832817939 0.217013167947646 NA NA NA NA NA NA
"1390" "Struptjärn" 2015 184 12.8571706891919 0 18.5463943011286 0 21.5056023506954 0.378527556319592 NA NA NA NA NA NA
"1391" "Struptjärn" 2015 185 29.1552087566112 0 44.2608813369494 0 59.4231276033145 0.837546144918468 NA NA NA NA NA NA
"1392" "Struptjärn" 2015 186 28.2021196500574 0 40.2600247028475 0 52.2529422695422 0.943776871607189 NA NA NA NA NA NA
"1393" "Struptjärn" 2015 187 27.7039873143292 0 39.3694161097594 0 56.1771923763332 0.59570608039294 NA NA NA NA NA NA
"1394" "Struptjärn" 2015 188 29.977159506233 0 42.9208451264197 0 57.3989507373246 1.55123694938339 NA NA NA NA NA NA
"1395" "Struptjärn" 2015 189 27.145570766713 0 37.4361887730364 0 45.4011940175219 0.758023650237757 NA NA NA NA NA NA
"1396" "Struptjärn" 2015 190 33.235503411168 0 50.7105713865327 0 76.7474810906769 1.18631714665764 35.7591504678537 0 55.0952500138472 0 68.0511135470291 1.38883104342728
"1397" "Struptjärn" 2015 191 38.744500409099 0 58.6462754599179 0 87.9679809157789 1.53334714271758 NA NA NA NA NA NA
"1398" "Struptjärn" 2015 192 30.1085512438274 0 42.5672187315051 0 53.2098940901151 0.873532489926207 NA NA NA NA NA NA
"1399" "Struptjärn" 2015 193 26.0725667364432 0 37.0534733437773 0 44.6718188921065 0.726172930619656 NA NA NA NA NA NA
"1400" "Struptjärn" 2015 194 20.2014645659028 0 28.168014780747 0 39.4477302964899 0.727215720779012 NA NA NA NA NA NA
"1401" "Struptjärn" 2015 195 13.1685572450233 0 18.6685158024905 0 25.0013165611895 0.459262573358177 NA NA NA NA NA NA
"1402" "Struptjärn" 2015 196 20.4903779227889 0 30.1973900194869 0 41.9928230601421 0.630895212547444 NA NA NA NA NA NA
"1403" "Struptjärn" 2015 197 23.0394141480993 0 31.7587897072848 0 39.3264403339809 0.765900092996333 NA NA NA NA NA NA
"1404" "Struptjärn" 2015 198 33.5084928978559 0 50.246654692186 0 62.7245703226967 1.0488247331168 NA NA NA NA NA NA
"1405" "Struptjärn" 2015 199 38.3970792236488 0 55.7232149002439 0 91.4902225435701 1.32790433213317 NA NA NA NA NA NA
"1406" "Struptjärn" 2015 200 32.1101026345048 0 46.8827545407018 0 64.0673935631782 1.52282579399827 NA NA NA NA NA NA
"1407" "Struptjärn" 2015 201 35.1338120792437 0 52.3194129513507 0 72.6472947530929 0.9417790378649 NA NA NA NA NA NA
"1408" "Struptjärn" 2015 202 31.3227819931784 0 46.2877051611846 0 61.9793595820932 1.24379985197884 32.2214692493879 0 47.550021734537 0 32.1729408715257 0.018654194629107
"1409" "Struptjärn" 2015 203 29.5873267100292 0 42.2279789103339 0 58.6758996807554 1.02673729157815 NA NA NA NA NA NA
"1410" "Struptjärn" 2015 204 24.9223738767 0 34.0011197616612 0 46.6989564998673 1.26818709539843 NA NA NA NA NA NA
"1411" "Struptjärn" 2015 205 27.0683036277204 0 37.9877130366896 0 52.8402212045729 1.59599659015167 NA NA NA NA NA NA
"1412" "Struptjärn" 2015 206 27.9767149635281 0 39.3335245658963 0 55.7026137770764 1.34666240585206 NA NA NA NA NA NA
"1413" "Struptjärn" 2015 207 26.8453946433396 0 38.9374668215172 0 65.9167910342744 1.32563604362823 NA NA NA NA NA NA
"1414" "Struptjärn" 2015 208 39.2173447089978 0 59.615073544498 0 90.4703460935343 2.09727387247205 NA NA NA NA NA NA
"1415" "Struptjärn" 2015 209 39.6358780685959 0 55.9909156062371 0 80.7848185138363 2.12754947665815 NA NA NA NA NA NA
"1416" "Struptjärn" 2015 210 33.1250526590872 0 44.5461621603597 0 59.1073637390563 1.89265552479602 NA NA NA NA NA NA
"1417" "Struptjärn" 2015 211 25.8843542425892 0 35.6764717755842 0 49.3973764440934 1.78988251570082 NA NA NA NA NA NA
"1418" "Struptjärn" 2015 212 26.05036338889 0 35.1663787872506 0 44.8732499919187 1.75052504502918 NA NA NA NA NA NA
"1419" "Struptjärn" 2015 213 37.2227785004236 0 56.4610877611046 0 78.5145539826564 1.90989929719741 NA NA NA NA NA NA
"1420" "Struptjärn" 2015 214 36.3236507737948 0 52.7437088323326 0 71.6036924601482 2.39189386716474 NA NA NA NA NA NA
"1421" "Struptjärn" 2015 215 38.0710971301623 0 54.9169683348129 0 74.5242810247763 1.87277210914402 NA NA NA NA NA NA
"1422" "Struptjärn" 2015 216 31.0414063084602 0 43.0580020097036 0 62.6821157918096 2.04357896341629 NA NA NA NA NA NA
"1423" "Struptjärn" 2015 217 33.8332214976725 0 48.7962422361006 0 73.5297284644636 2.00357605763592 NA NA NA NA NA NA
"1424" "Struptjärn" 2015 218 37.5004730765577 0 53.8853931238202 0 71.1422956004221 2.92705369486062 37.8599883200171 0 54.1885155774062 0 32.2173868699094 0.0374262754608194
"1425" "Struptjärn" 2015 219 33.3868113015823 0 47.5811250669031 0 67.3030594517235 1.77871071125206 NA NA NA NA NA NA
"1426" "Struptjärn" 2015 220 30.5813855114149 0 43.4934327900018 0 58.1781477232948 1.64178455812336 NA NA NA NA NA NA
"1427" "Struptjärn" 2015 221 32.2603309169506 0 45.0792977868405 0 56.8058288508538 2.02716284333458 NA NA NA NA NA NA
"1428" "Struptjärn" 2015 222 37.1662413307046 0 52.1158362263178 0 76.3115592030433 2.04398974386483 NA NA NA NA NA NA
"1429" "Struptjärn" 2015 223 39.5072450366235 0 57.2510497067867 0 87.2040229785835 2.62472723435534 NA NA NA NA NA NA
"1430" "Struptjärn" 2015 224 36.8997657717374 0 54.5062582210759 0 77.2732196761931 2.36271731568868 NA NA NA NA NA NA
"1431" "Struptjärn" 2015 225 47.412283064997 0 71.029972731328 0 102.884687001509 2.29427774197361 NA NA NA NA NA NA
"1432" "Struptjärn" 2015 226 49.2365888781471 0 70.276748953438 0 100.373076079349 3.50749798361705 NA NA NA NA NA NA
"1433" "Struptjärn" 2015 227 34.4208496493896 0 47.6772430447408 0 68.9436060848138 2.76265942283861 NA NA NA NA NA NA
"1434" "Struptjärn" 2015 228 36.080810197121 0 50.7056174562547 0 79.0205748248314 2.50198954515856 NA NA NA NA NA NA
"1435" "Struptjärn" 2015 229 33.5744861260408 0 47.116281908071 0 75.3332099560222 1.77366299410935 NA NA NA NA NA NA
"1436" "Struptjärn" 2015 230 32.2866852109437 0 46.9454068256555 0 74.1298776754673 1.89784324422323 32.8403309917007 0 49.7632392351176 0 42.3899789516852 0.0153935220971826
"1437" "Struptjärn" 2015 231 34.3762173244397 0 50.9533882253701 0 82.4755479700955 1.86519970454991 NA NA NA NA NA NA
"1438" "Struptjärn" 2015 232 37.9382959501599 0 56.5222652425114 0 90.8622213151076 1.96237719082892 NA NA NA NA NA NA
"1439" "Struptjärn" 2015 233 35.8146723199839 0 51.4216659484672 0 84.3780424515701 2.24975952710887 NA NA NA NA NA NA
"1440" "Struptjärn" 2015 234 30.2704962418399 0 42.0907497558332 0 67.4178431776693 2.19532416963112 NA NA NA NA NA NA
"1441" "Struptjärn" 2015 235 27.7545479344965 0 37.610037602313 0 61.4720382188274 2.07991419614881 NA NA NA NA NA NA
"1442" "Struptjärn" 2015 236 23.8106775921742 0 32.6551084398468 0 51.3974892335607 1.68416127733662 NA NA NA NA NA NA
"1443" "Struptjärn" 2015 237 20.8854999328361 0 28.1162736742575 0 44.7790804014542 1.51594813506442 NA NA NA NA NA NA
"1444" "Struptjärn" 2015 238 22.7837625813608 0 31.4639850759692 0 52.4977357905594 2.09008018190959 NA NA NA NA NA NA
"1445" "Struptjärn" 2015 239 35.3493284291619 0 52.6164030243639 0 86.6618570979622 2.83019579678645 NA NA NA NA NA NA
"1446" "Struptjärn" 2015 240 47.5729333257694 0 72.4228432518439 0 119.779388031719 3.30365453922102 NA NA NA NA NA NA
"1447" "Struptjärn" 2015 241 43.9674397621546 0 65.870060483698 0 105.542163096609 3.72323958845794 NA NA NA NA NA NA
"1448" "Struptjärn" 2015 242 43.1647856986616 0 60.9862722963114 0 97.637498709629 3.16982934211959 NA NA NA NA NA NA
"1449" "Struptjärn" 2015 243 41.4200943649761 0 55.4857514375361 0 91.6726514168918 3.59755163132608 NA NA NA NA NA NA
"1450" "Struptjärn" 2015 244 51.2596453428132 0 71.5837991788046 0 114.294925042688 4.36208922077284 NA NA NA NA NA NA
"1451" "Struptjärn" 2015 245 60.3551834118047 0 84.7197117273936 0 143.351270676218 4.45876203516915 NA NA NA NA NA NA
"1452" "Struptjärn" 2015 246 51.970083301936 0 69.2946318928271 0 116.606558186272 4.43859452020186 59.238795500064 0 87.5789296136018 0 63.251184109561 0.0328595304920909
"1453" "Struptjärn" 2015 247 52.0760752092923 0 72.6820990037938 0 118.819111601333 4.18459091136425 NA NA NA NA NA NA
"1454" "Struptjärn" 2015 248 47.135350500863 0 62.7864701440837 0 95.6078282640961 5.42326244830581 NA NA NA NA NA NA
"1455" "Struptjärn" 2015 249 56.4214579350948 0 82.3657926870845 0 128.927058695963 6.02828061729371 NA NA NA NA NA NA
"1456" "Struptjärn" 2015 250 66.5451514186977 0 98.2509134027008 0 151.279560471088 6.14795460652139 NA NA NA NA NA NA
"1457" "Struptjärn" 2015 251 71.9503548439098 0 105.452750511737 0 170.671911357322 6.89921997922046 NA NA NA NA NA NA
"1458" "Struptjärn" 2015 252 68.8156463719962 0 96.8846759404319 0 157.053813474986 7.60088876603594 NA NA NA NA NA NA
"1459" "Struptjärn" 2015 253 65.9500352240751 0 90.3533139832026 0 146.282370230577 7.70866810450558 NA NA NA NA NA NA
"1460" "Struptjärn" 2015 254 64.9434097646446 0 89.9681174855149 0 159.803245583892 6.04572868298447 NA NA NA NA NA NA
"1461" "Struptjärn" 2015 255 60.7698262355156 0 85.8906797569789 0 145.964596404677 6.83748815581616 NA NA NA NA NA NA
"1462" "Struptjärn" 2015 256 56.0289329251831 0 79.7163578265019 0 131.809354868514 8.55591047762012 NA NA NA NA NA NA
"1463" "Struptjärn" 2015 257 53.8906832969873 0 74.1500451836522 0 127.28966785266 8.18925281553276 NA NA NA NA NA NA
"1464" "Struptjärn" 2015 258 49.7552973899539 0 69.2088978040528 0 116.242761409309 7.55582391867113 NA NA NA NA NA NA
"1465" "Struptjärn" 2015 259 47.4092915335472 0 68.2883711025431 0 111.627050115483 7.03604960600568 53.6978793467829 0 81.5941405381008 0 84.9288680624312 0.234026128590112
"1466" "Struptjärn" 2015 260 43.1588507106712 0 60.9140626656857 0 106.620407998846 7.21898029971752 NA NA NA NA NA NA
"1467" "Struptjärn" 2015 261 35.8255874521626 0 49.8412850333795 0 77.9814775025508 6.91976272024746 NA NA NA NA NA NA
"1468" "Struptjärn" 2015 262 47.1074132426349 0 72.3328735934771 0 117.268294382336 4.65402702806175 NA NA NA NA NA NA
"1469" "Struptjärn" 2015 263 48.3705288591185 0 68.415944573298 0 112.002864616266 6.62819173362681 NA NA NA NA NA NA
"1470" "Struptjärn" 2015 264 50.0882588576182 0 72.3578583398331 0 111.791861207067 6.61269030917405 NA NA NA NA NA NA
"1471" "Struptjärn" 2015 265 59.7875376373586 0 87.9142645043185 0 139.621427187158 7.31862007621777 NA NA NA NA NA NA
"1472" "Struptjärn" 2015 266 62.3636275505141 0 89.7457966751616 0 159.299121847416 7.46487433584347 NA NA NA NA NA NA
"1473" "Struptjärn" 2015 267 63.071433138163 0 94.2507543815574 0 153.415220512728 8.05003725826884 NA NA NA NA NA NA
"1474" "Struptjärn" 2015 268 75.0548834687065 0 110.026507461921 0 197.767415888871 8.39867481750178 NA NA NA NA NA NA
"1475" "Struptjärn" 2015 269 76.3480031215178 0 112.556966388413 0 193.210666819376 7.3438181978996 NA NA NA NA NA NA
"1476" "Struptjärn" 2015 270 80.801417045987 0 120.176964233527 0 197.434815928947 9.36016444690162 NA NA NA NA NA NA
"1477" "Struptjärn" 2015 271 82.660981088307 0 114.271244328643 0 199.691253325871 9.82189093678036 NA NA NA NA NA NA
"1478" "Struptjärn" 2015 272 96.007497402556 0 133.343432122184 0 262.048347686517 10.8911815366394 121.353219787456 0 184.510623046315 0 245.691088189807 0.200160706042775
"1479" "Struptjärn" 2015 273 95.8435749085222 0 140.661768769439 0 244.324069769069 13.2409899952358 NA NA NA NA NA NA
"1483" "Stortjärn" 2012 153 53.7816715980065 0 74.8211759217165 0 89.3812576041529 0 NA NA NA NA NA NA
"1484" "Stortjärn" 2012 154 212.466425952611 0 205.511844984388 0 344.381194633114 0 NA NA NA NA NA NA
"1485" "Stortjärn" 2012 155 92.0555908030929 0 118.750491295951 0 161.456594111827 0 NA NA NA NA NA NA
"1486" "Stortjärn" 2012 156 54.914674258761 0 77.754309999981 0 83.3843877311214 0 NA NA NA NA NA NA
"1487" "Stortjärn" 2012 157 40.6749725954203 0 55.1842595465305 0 57.1664039074811 0 NA NA NA NA NA NA
"1488" "Stortjärn" 2012 158 34.1748099008919 0 44.6938478873818 0 43.1956071892367 0 NA NA NA NA NA NA
"1489" "Stortjärn" 2012 159 48.6632447152571 0 68.0987921824874 0 94.0383830610961 0.000230016069368936 NA NA NA NA NA NA
"1490" "Stortjärn" 2012 160 45.985714150472 0 68.6327119453707 0 86.1923704739617 0 NA NA NA NA NA NA
"1491" "Stortjärn" 2012 161 38.8332320861891 0 55.8921371545455 0 64.2638507195183 0 NA NA NA NA NA NA
"1492" "Stortjärn" 2012 162 32.6998875101836 0 40.8400183433862 0 34.7140597077773 0 NA NA NA NA NA NA
"1493" "Stortjärn" 2012 163 31.8101744168352 0 38.9934400960904 0 27.8865924786496 0 NA NA NA NA NA NA
"1494" "Stortjärn" 2012 164 38.6792849901297 0 53.3922664575896 0 61.3468403964176 0 34.4966473164141 0 43.4083778389049 0 8.55610459643922 0
"1495" "Stortjärn" 2012 165 46.0250307221876 0 67.5706100932666 0 83.3544748963713 0 NA NA NA NA NA NA
"1496" "Stortjärn" 2012 166 45.4865716613917 0 62.0835110926965 0 79.6658733141527 0 NA NA NA NA NA NA
"1497" "Stortjärn" 2012 167 41.5182765904197 0 62.1613429385583 0 76.6328404750843 0 NA NA NA NA NA NA
"1498" "Stortjärn" 2012 168 56.8365722949982 0 78.5728054024719 0 112.728823422382 0 NA NA NA NA NA NA
"1499" "Stortjärn" 2012 169 31.4425654188701 0 40.0655095034653 0 37.1885150234492 0 NA NA NA NA NA NA
"1500" "Stortjärn" 2012 170 55.4208246656359 0 76.2922967890852 0 105.768829544204 0.000583352495204453 NA NA NA NA NA NA
"1501" "Stortjärn" 2012 171 38.1053922183429 0 53.242459525662 0 58.0453474693339 0 NA NA NA NA NA NA
"1502" "Stortjärn" 2012 172 72.78415337451 0 93.0378744984604 0 139.252926476047 0 NA NA NA NA NA NA
"1503" "Stortjärn" 2012 173 74.2401296419117 0 97.556379738902 0 146.071584473913 0 NA NA NA NA NA NA
"1504" "Stortjärn" 2012 174 48.9725605472942 0 71.7562520824139 0 93.0671595898328 0 NA NA NA NA NA NA
"1505" "Stortjärn" 2012 175 47.4830165652723 0 68.1228609924638 0 98.3544179882553 0 NA NA NA NA NA NA
"1506" "Stortjärn" 2012 176 42.0368146248834 0 63.0741129673923 0 86.6948967296524 0 NA NA NA NA NA NA
"1507" "Stortjärn" 2012 177 35.087268547251 0 50.8713203358145 0 66.2527870212289 0 NA NA NA NA NA NA
"1508" "Stortjärn" 2012 178 40.548331046626 0 58.7280665912268 0 77.3169699014035 0 NA NA NA NA NA NA
"1509" "Stortjärn" 2012 179 46.9505442276245 0 64.6009422134994 0 93.5790820536534 0 64.1543643319152 0 77.7611532756506 0 114.108479340695 0
"1510" "Stortjärn" 2012 180 35.8004111053946 0 53.0161096353886 0 63.351419122207 0 NA NA NA NA NA NA
"1511" "Stortjärn" 2012 181 49.8107505402194 0 67.26154123716 0 96.6184967538841 0 NA NA NA NA NA NA
"1512" "Stortjärn" 2012 182 70.4434367448163 0 84.0914968639777 0 128.154445439693 0 NA NA NA NA NA NA
"1513" "Stortjärn" 2012 183 45.9328785772123 0 58.915941933234 0 73.5082604791446 0.00116019350975754 NA NA NA NA NA NA
"1514" "Stortjärn" 2012 184 38.064780051385 0 52.5697892263678 0 68.8206930774909 0 NA NA NA NA NA NA
"1515" "Stortjärn" 2012 185 47.3221429781105 0 68.1783592974083 0 93.4890248000763 0 NA NA NA NA NA NA
"1516" "Stortjärn" 2012 186 42.7047125747287 0 62.8568577052837 0 80.1843544450746 0 NA NA NA NA NA NA
"1517" "Stortjärn" 2012 187 46.10066250685 0 66.8060465242134 0 93.0241003095787 0 NA NA NA NA NA NA
"1518" "Stortjärn" 2012 188 39.3982021833999 0 53.8593918501205 0 77.4223335566164 0 NA NA NA NA NA NA
"1519" "Stortjärn" 2012 189 26.5565378276287 0 37.5660847946036 0 47.7998511804379 0 NA NA NA NA NA NA
"1520" "Stortjärn" 2012 190 28.0526899995012 0 37.9509595736486 0 40.8514967679461 0 NA NA NA NA NA NA
"1521" "Stortjärn" 2012 191 43.5324093514927 0 62.9369467861188 0 83.8646530825496 0 NA NA NA NA NA NA
"1522" "Stortjärn" 2012 192 101.176935544013 0 120.911400842295 0 192.784517134723 0 NA NA NA NA NA NA
"1523" "Stortjärn" 2012 193 40.8635132288212 0 51.60239432369 0 46.5575067710679 0 28.6592690826073 0 34.7510943948523 0 5.04339855064248 0
"1524" "Stortjärn" 2012 194 43.4199512687078 0 61.7010782354393 0 73.8889888587251 0 NA NA NA NA NA NA
"1525" "Stortjärn" 2012 195 31.7901312350728 0 43.3572213111248 0 37.0314068809057 0 NA NA NA NA NA NA
"1526" "Stortjärn" 2012 196 30.4314432370333 0 39.5121426934372 0 43.4326085798689 0 NA NA NA NA NA NA
"1527" "Stortjärn" 2012 197 31.6797436230518 0 42.357367980448 0 43.8812372166951 0 NA NA NA NA NA NA
"1528" "Stortjärn" 2012 198 42.300567486978 0 61.1523532381701 0 83.6972819250344 0 NA NA NA NA NA NA
"1529" "Stortjärn" 2012 199 56.0456350105743 0 79.2357009636945 0 111.896677465389 0 NA NA NA NA NA NA
"1530" "Stortjärn" 2012 200 52.9491783215447 0 78.6257346807204 0 106.187255900149 0.00237558016526254 NA NA NA NA NA NA
"1531" "Stortjärn" 2012 201 34.2240361837579 0 47.4358154928053 0 52.6561244636021 0 NA NA NA NA NA NA
"1532" "Stortjärn" 2012 202 49.8414744810204 0 72.946061572759 0 100.895698481095 0 NA NA NA NA NA NA
"1533" "Stortjärn" 2012 203 66.83101935103 0 89.0967489830792 0 135.705342265736 0 NA NA NA NA NA NA
"1534" "Stortjärn" 2012 204 47.1782217172382 0 67.1221890248365 0 88.7369398877305 0 NA NA NA NA NA NA
"1535" "Stortjärn" 2012 205 51.5191132415623 0 74.5038622809312 0 100.657279768754 0 NA NA NA NA NA NA
"1536" "Stortjärn" 2012 206 39.4581160850529 0 52.9796462012991 0 68.2787065368252 0 NA NA NA NA NA NA
"1537" "Stortjärn" 2012 207 32.7792828136767 0 45.8602256999045 0 59.6175594863656 0 NA NA NA NA NA NA
"1538" "Stortjärn" 2012 208 48.130379145291 0 70.2665292249998 0 98.8539505820271 0 NA NA NA NA NA NA
"1539" "Stortjärn" 2012 209 31.8151274087194 0 46.9496312023193 0 59.7527139723214 0 NA NA NA NA NA NA
"1540" "Stortjärn" 2012 210 39.2634317604871 0 56.5248400625298 0 81.0207871371935 0 NA NA NA NA NA NA
"1541" "Stortjärn" 2012 211 39.72705275819 0 55.9705042004413 0 75.0580487416049 0 NA NA NA NA NA NA
"1542" "Stortjärn" 2012 212 52.1606004018746 0 69.2852967495701 0 98.5504092659608 0 NA NA NA NA NA NA
"1543" "Stortjärn" 2012 213 41.9512100378072 0 51.4304734683296 0 76.6818088469336 0 NA NA NA NA NA NA
"1544" "Stortjärn" 2012 214 23.9128512577595 0 32.9343834804049 0 40.3088706949257 0 NA NA NA NA NA NA
"1545" "Stortjärn" 2012 215 28.9173966054546 0 36.2240303955369 0 47.6764441446178 0 NA NA NA NA NA NA
"1546" "Stortjärn" 2012 216 22.5534315332182 0 28.5754790439631 0 34.1477734335635 0 NA NA NA NA NA NA
"1547" "Stortjärn" 2012 217 22.4239175914913 0 28.315012782861 0 28.0613554796913 0 NA NA NA NA NA NA
"1548" "Stortjärn" 2012 218 28.0053022883153 0 38.0741080074866 0 47.2059897333514 0 NA NA NA NA NA NA
"1549" "Stortjärn" 2012 219 25.9925031145604 0 36.5109229777168 0 48.9887728824257 0 NA NA NA NA NA NA
"1550" "Stortjärn" 2012 220 51.2208720955803 0 71.2720178656811 0 110.236609503585 0 NA NA NA NA NA NA
"1551" "Stortjärn" 2012 221 58.9309714679216 0.49477675533382 80.2190742636303 0.632355588311303 116.547256155963 0.911149002085042 72.0115801335217 0 96.1365938137487 0 131.360093416101 0
"1552" "Stortjärn" 2012 222 30.952901035223 0 39.9969969598742 0 45.3976572005335 0 NA NA NA NA NA NA
"1553" "Stortjärn" 2012 223 36.3960779503916 0 50.1793737965665 0 66.7270513847784 0 NA NA NA NA NA NA
"1554" "Stortjärn" 2012 224 35.3318796335315 0 52.5959617389539 0 65.9969621642293 0 NA NA NA NA NA NA
"1555" "Stortjärn" 2012 225 30.0616677910487 0 41.7668731797013 0 47.0567355639001 0 NA NA NA NA NA NA
"1556" "Stortjärn" 2012 226 31.4651751602531 0 45.1393062239258 0 63.8184096006616 0 NA NA NA NA NA NA
"1557" "Stortjärn" 2012 227 24.5855761626897 0 33.8728113884305 0 48.9782863661922 0 NA NA NA NA NA NA
"1558" "Stortjärn" 2012 228 21.510383855623 0 28.3547219404853 0 41.3361588914276 0 NA NA NA NA NA NA
"1559" "Stortjärn" 2012 229 22.8441524318973 0 32.0131288953279 0 45.2015153821101 0 NA NA NA NA NA NA
"1560" "Stortjärn" 2012 230 21.4395992685967 0 29.4605966697177 0 45.3090683973499 0 NA NA NA NA NA NA
"1561" "Stortjärn" 2012 231 23.7135242336267 0 32.2637435184192 0 49.4533656115127 0 NA NA NA NA NA NA
"1562" "Stortjärn" 2012 232 65.6370418554093 0 87.6829776866399 0 137.082102007162 0 NA NA NA NA NA NA
"1563" "Stortjärn" 2012 233 51.4925497229262 0 75.9101437554544 0 105.348727618646 0 NA NA NA NA NA NA
"1564" "Stortjärn" 2012 234 51.34487459046 0 69.1122627821745 0 105.097086003304 0 NA NA NA NA NA NA
"1565" "Stortjärn" 2012 235 42.4695912741234 0 62.4721461160354 0 78.9426011218812 0 47.3616410298685 0 73.4793534889871 0 74.9291902066635 0
"1566" "Stortjärn" 2012 236 47.5257871420206 0 70.6458718183135 0 92.2951193508524 0 NA NA NA NA NA NA
"1567" "Stortjärn" 2012 237 38.5351696985184 0 53.2659647926108 0 64.8927805323478 0 NA NA NA NA NA NA
"1568" "Stortjärn" 2012 238 40.1530707069356 0 55.1397623734021 0 71.1925016462012 0 NA NA NA NA NA NA
"1569" "Stortjärn" 2012 239 42.8874258521382 0 62.6632417528906 0 79.2973652456331 0 NA NA NA NA NA NA
"1570" "Stortjärn" 2012 240 96.074855049015 0 111.200298670502 0 186.105109970949 0 NA NA NA NA NA NA
"1571" "Stortjärn" 2012 241 52.1776613832447 0 68.3356179437309 0 80.8352234804778 0 NA NA NA NA NA NA
"1572" "Stortjärn" 2012 242 54.4324482774203 0 76.0101394516417 0 98.6939846140406 0 NA NA NA NA NA NA
"1573" "Stortjärn" 2012 243 82.9785636966643 0 118.045680279077 0 162.240959737642 0.0111446949660594 NA NA NA NA NA NA
"1574" "Stortjärn" 2012 244 60.9753200608747 0 80.5425368012058 0 93.2472327371548 0 NA NA NA NA NA NA
"1575" "Stortjärn" 2012 245 35.3202939597163 0 42.8821997504953 0 42.3807752265925 0 NA NA NA NA NA NA
"1576" "Stortjärn" 2012 246 40.067690550055 0 51.4054653502491 0 55.5658301001936 0 NA NA NA NA NA NA
"1577" "Stortjärn" 2012 247 57.0988426411114 0 80.2029102617512 0 108.809074051843 0.00231293977188088 NA NA NA NA NA NA
"1578" "Stortjärn" 2012 248 76.8653703540739 0 101.371453130205 0 150.925322832208 0.0012950032296981 NA NA NA NA NA NA
"1579" "Stortjärn" 2012 249 90.6800905997954 4.26460287349698 111.587989464502 5.14749371653094 178.67309542368 7.94737008534573 131.058269119861 0 163.502100351025 0 239.755029577241 0
"1580" "Stortjärn" 2012 250 96.1721845031924 7.50993064422339 129.57990027592 10.1826409943644 196.380064810797 15.3051075271317 NA NA NA NA NA NA
"1581" "Stortjärn" 2012 251 53.3006447583285 4.02766706783914 75.0962929228708 5.67087521470535 111.919883443552 8.33460136354861 NA NA NA NA NA NA
"1582" "Stortjärn" 2012 252 70.7415499163912 5.33622374665001 104.124043740394 7.83488406759201 145.504227780214 11.1966929942373 NA NA NA NA NA NA
"1583" "Stortjärn" 2012 253 70.7663488809663 5.25522662871274 103.187978147462 7.70031249169173 144.200305612628 10.5610282883898 NA NA NA NA NA NA
"1584" "Stortjärn" 2012 254 63.9492113607118 4.47472710032723 95.2911305761225 6.67914797350411 127.440849057428 8.90128122945267 NA NA NA NA NA NA
"1585" "Stortjärn" 2012 255 71.5007848085765 5.42378019867324 104.339587209521 7.93990306347134 135.789240858949 10.3205888729118 NA NA NA NA NA NA
"1586" "Stortjärn" 2012 256 51.9048906681144 3.59215531808727 77.073382084282 5.33273217952411 86.4857745114804 5.99494650591995 NA NA NA NA NA NA
"1587" "Stortjärn" 2012 257 50.7264385694548 3.41896783559264 76.1904746749892 5.14167256124528 93.4567455230798 6.30399874353038 NA NA NA NA NA NA
"1588" "Stortjärn" 2012 258 97.7117740416658 7.37925434639171 128.819757951212 9.6721461304568 190.84591624853 14.3179334231981 NA NA NA NA NA NA
"1589" "Stortjärn" 2012 259 67.2682425515873 5.01316958517976 100.20593303676 7.45206577988021 136.795090902817 10.0847912503056 NA NA NA NA NA NA
"1590" "Stortjärn" 2012 260 50.9000124402735 3.86899144231705 77.9406492339091 5.93002141804021 101.000644008867 7.72313980773479 NA NA NA NA NA NA
"1591" "Stortjärn" 2012 261 56.0510145055376 1.83375278360873 79.7878786977897 2.6562734020711 108.390645602456 3.75112769868041 58.6577588439351 0 89.5890608027566 0 98.3302115703255 0
"1592" "Stortjärn" 2012 262 58.1920273163228 0 81.6664727854234 0 113.12227503361 0 NA NA NA NA NA NA
"1593" "Stortjärn" 2012 263 42.4312741811305 0 59.4223477888171 0 76.2224229112487 0 NA NA NA NA NA NA
"1594" "Stortjärn" 2012 264 59.9974842204921 19.0159789060598 79.8532725062562 19.2049767047117 114.735543801653 37.6067271213908 NA NA NA NA NA NA
"1595" "Stortjärn" 2012 265 55.1124487609077 20.0523339482493 76.0067462411482 24.0382745295757 107.961193337974 41.4884871931494 NA NA NA NA NA NA
"1596" "Stortjärn" 2012 266 41.5584478107131 8.96955780272434 59.5199829355198 15.0907365936322 80.7748613808716 23.5730836753812 NA NA NA NA NA NA
"1597" "Stortjärn" 2012 267 52.5678030134549 19.730656576453 72.5079655070206 23.2424131448057 100.349353617117 41.3623386568209 NA NA NA NA NA NA
"1598" "Stortjärn" 2012 268 55.7007172380253 20.8706530849907 74.6524672836913 23.3854996991843 106.46266163314 41.5527763263544 NA NA NA NA NA NA
"1599" "Stortjärn" 2012 269 48.4947186915521 16.3355058916909 68.8642692145189 21.050395962425 91.6091403641044 36.338916301733 NA NA NA NA NA NA
"1600" "Stortjärn" 2012 270 39.8219910685435 9.38430076166726 57.7914237572056 15.3641530962154 70.002034659534 24.7984324914769 NA NA NA NA NA NA
"1601" "Stortjärn" 2012 271 41.6166711742295 12.1392934052862 59.9633258926142 17.2387206918295 72.8796320578237 29.5639899921255 NA NA NA NA NA NA
"1602" "Stortjärn" 2012 272 38.2123570290736 11.7284753657198 54.3650041008415 15.7692050223282 69.1248555880482 27.3939219578031 NA NA NA NA NA NA
"1603" "Stortjärn" 2012 273 38.6101027546012 12.0482349595413 54.3066841643315 16.0850281456043 68.0669024406772 28.1987133604174 NA NA NA NA NA NA
"1604" "Stortjärn" 2012 274 36.2960843510049 9.26570222717669 51.7121607451848 13.7104007858669 57.4340119869826 23.746903840095 NA NA NA NA NA NA
"1606" "Stortjärn" 2013 152 53.8857430827142 0 80.3169978628722 0 102.845329423354 0 NA NA NA NA NA NA
"1607" "Stortjärn" 2013 153 42.9004250622881 0 66.1177745523942 0 71.9183730917092 0 NA NA NA NA NA NA
"1608" "Stortjärn" 2013 154 60.9179271924386 0 89.6056109524191 0 122.795514367079 0 NA NA NA NA NA NA
"1609" "Stortjärn" 2013 155 77.9238046253685 0 106.425973613247 0 157.736090460015 0 NA NA NA NA NA NA
"1610" "Stortjärn" 2013 156 90.2299761146481 0 123.663463640167 0 175.92775583929 0 100.645525894522 0 138.527958171332 0 183.512657992935 0
"1611" "Stortjärn" 2013 157 67.7092223226785 0 101.207137277837 0 132.464891114832 0 NA NA NA NA NA NA
"1612" "Stortjärn" 2013 158 44.1577034977425 0 65.6262859504535 0 77.8132387235164 0 NA NA NA NA NA NA
"1613" "Stortjärn" 2013 159 45.7507882099621 0 69.7704437743801 0 88.4242052170679 0 NA NA NA NA NA NA
"1614" "Stortjärn" 2013 160 36.5186032455233 0 55.9710137597749 0 65.1436662997234 0 NA NA NA NA NA NA
"1615" "Stortjärn" 2013 161 44.7747449014448 0 66.908563601497 0 90.0574714502471 0 NA NA NA NA NA NA
"1616" "Stortjärn" 2013 162 42.2573556272138 0 62.7162340056397 0 80.8632625698101 0 NA NA NA NA NA NA
"1617" "Stortjärn" 2013 163 37.1654236573395 0 56.0236633012316 0 69.4899097084404 0 NA NA NA NA NA NA
"1618" "Stortjärn" 2013 164 53.4620235484642 0 78.1719415593953 0 107.085927410069 0 NA NA NA NA NA NA
"1619" "Stortjärn" 2013 165 38.6216419327792 0 59.8428792859137 0 69.0307652070521 0 NA NA NA NA NA NA
"1620" "Stortjärn" 2013 166 45.7747931973328 0 69.0441069775967 0 85.6488520462916 0 NA NA NA NA NA NA
"1621" "Stortjärn" 2013 167 39.6248374022384 0 59.2458002136551 0 73.5784368491859 0 NA NA NA NA NA NA
"1622" "Stortjärn" 2013 168 40.9390183462874 0 59.234905178174 0 76.811502728222 0 NA NA NA NA NA NA
"1623" "Stortjärn" 2013 169 50.9096994461752 0 74.041956608594 0 101.876058947345 0 NA NA NA NA NA NA
"1624" "Stortjärn" 2013 170 40.9166381438609 0 60.3400274906917 0 77.3436130114703 0 33.1501275104421 0 51.9686470511909 0 42.7345761615879 0
"1625" "Stortjärn" 2013 171 43.0074531348389 0 64.4766827908323 0 80.9101996397289 0 NA NA NA NA NA NA
"1626" "Stortjärn" 2013 172 40.3036637870465 0 59.2580086420912 0 76.6443876432809 0 NA NA NA NA NA NA
"1627" "Stortjärn" 2013 173 48.8181108722223 0 69.1868901356994 0 97.6229398437645 0 NA NA NA NA NA NA
"1628" "Stortjärn" 2013 174 40.3336367062164 0 58.8734359584761 0 78.3157778985623 0 NA NA NA NA NA NA
"1629" "Stortjärn" 2013 175 38.3696677647924 0 53.2706030116011 0 74.1739301081491 0 NA NA NA NA NA NA
"1630" "Stortjärn" 2013 176 28.5033189956891 0 42.7616261637828 0 55.1282647401294 0 NA NA NA NA NA NA
"1631" "Stortjärn" 2013 177 39.9629770298212 0 53.3962612002796 0 78.8564822685493 0 NA NA NA NA NA NA
"1632" "Stortjärn" 2013 178 45.7709593285044 0 61.5427601919997 0 83.6619610681898 0 NA NA NA NA NA NA
"1633" "Stortjärn" 2013 179 33.8315041737753 0 47.8734694087085 0 61.9336627517632 0 NA NA NA NA NA NA
"1634" "Stortjärn" 2013 180 29.1969973153197 0 45.1703272667256 0 50.4877825145752 0 NA NA NA NA NA NA
"1635" "Stortjärn" 2013 181 25.6062556024473 0 39.318508776987 0 40.766351901315 0 NA NA NA NA NA NA
"1636" "Stortjärn" 2013 182 25.031316487612 0 37.0731563076721 0 45.5555579412015 0 NA NA NA NA NA NA
"1637" "Stortjärn" 2013 183 28.3491107085214 0 42.4795681544746 0 57.3228111458724 0 NA NA NA NA NA NA
"1638" "Stortjärn" 2013 184 51.4192512010629 0 70.8498036646599 0 102.587604821741 0 65.587917389852 0 85.896087108631 0 120.014975616657 0
"1639" "Stortjärn" 2013 185 41.1690621859291 0 60.7698322462768 0 82.590477926262 0 NA NA NA NA NA NA
"1640" "Stortjärn" 2013 186 49.1673486775143 0 73.6735904200865 0 94.568105837573 0 NA NA NA NA NA NA
"1641" "Stortjärn" 2013 187 66.5605007203593 0 94.7250611565308 0 130.952117551439 0 NA NA NA NA NA NA
"1642" "Stortjärn" 2013 188 61.0857256908031 0 87.9703879790752 0 124.520220377556 0 NA NA NA NA NA NA
"1643" "Stortjärn" 2013 189 80.0680350260153 0 111.549179394892 0 161.095191490453 0 NA NA NA NA NA NA
"1644" "Stortjärn" 2013 190 63.2833861013463 0 96.7373040365965 0 121.942144456956 0 NA NA NA NA NA NA
"1645" "Stortjärn" 2013 191 75.4380349542119 0 111.864284244446 0 148.600152134496 0 NA NA NA NA NA NA
"1646" "Stortjärn" 2013 192 75.6917195311742 0 111.705897505618 0 152.66851572347 0 NA NA NA NA NA NA
"1647" "Stortjärn" 2013 193 59.2109089758311 0 89.1215606451977 0 108.780942141777 0 NA NA NA NA NA NA
"1648" "Stortjärn" 2013 194 49.890752934591 0 75.0784452704006 0 96.3683133655029 0 NA NA NA NA NA NA
"1649" "Stortjärn" 2013 195 51.8681130393651 0 77.7149205658739 0 105.095027977732 0 NA NA NA NA NA NA
"1650" "Stortjärn" 2013 196 44.9456482888751 0 68.1158912109956 0 92.6704334249853 0 NA NA NA NA NA NA
"1651" "Stortjärn" 2013 197 93.3463096027903 0 122.926086690932 0 185.729604251299 0 NA NA NA NA NA NA
"1652" "Stortjärn" 2013 198 71.7411556683756 0 105.635109971637 0 138.33565464948 0 62.6702121143403 0 94.3761514516279 0 110.35663706674 0
"1653" "Stortjärn" 2013 199 64.4933386231216 0 94.7666841172602 0 129.392611376572 0 NA NA NA NA NA NA
"1654" "Stortjärn" 2013 200 61.8076954574748 0 87.8682448322301 0 124.225391221879 0 NA NA NA NA NA NA
"1655" "Stortjärn" 2013 201 43.2280393007954 0 65.6654618934557 0 82.7551279815314 0 NA NA NA NA NA NA
"1656" "Stortjärn" 2013 202 64.666433788944 0 87.4209256832967 0 128.2819203358 0 NA NA NA NA NA NA
"1657" "Stortjärn" 2013 203 68.9310257422343 0 91.2190336932602 0 138.50350330654 0 NA NA NA NA NA NA
"1658" "Stortjärn" 2013 204 58.8260825270304 0 79.3371645194117 0 118.773388834551 0 NA NA NA NA NA NA
"1659" "Stortjärn" 2013 205 43.1502446842828 0 63.084734996848 0 84.5426479072703 0 NA NA NA NA NA NA
"1660" "Stortjärn" 2013 206 29.399113114376 0 45.5413551739033 0 51.6690941986466 0 NA NA NA NA NA NA
"1661" "Stortjärn" 2013 207 24.7424930311557 0 37.42171303876 0 44.6417237100978 0 NA NA NA NA NA NA
"1662" "Stortjärn" 2013 208 33.1458273813989 0 49.9950725302975 0 70.4276206355022 0 NA NA NA NA NA NA
"1663" "Stortjärn" 2013 209 32.2467282375579 0 48.2378603868389 0 68.3309187076218 0 NA NA NA NA NA NA
"1664" "Stortjärn" 2013 210 36.4089601364809 0 53.8862375167021 0 79.8427751624568 0 NA NA NA NA NA NA
"1665" "Stortjärn" 2013 211 36.6623215208257 0 53.9239465021152 0 68.7672981058849 0 NA NA NA NA NA NA
"1666" "Stortjärn" 2013 212 71.0447708719905 0 92.3579291353389 0 137.234918475431 0 53.9810193060163 0 75.7507688078451 0 99.882491094553 0
"1667" "Stortjärn" 2013 213 28.8302514796139 0 44.0012592558548 0 48.1801296669348 0 NA NA NA NA NA NA
"1668" "Stortjärn" 2013 214 31.9576523626349 0 49.0528526756917 0 59.5639364498051 0 NA NA NA NA NA NA
"1669" "Stortjärn" 2013 215 34.144255331896 0 51.1774903021226 0 67.8247460854176 0 NA NA NA NA NA NA
"1670" "Stortjärn" 2013 216 37.422541128165 0 55.9862696691176 0 75.6163658126402 0 NA NA NA NA NA NA
"1671" "Stortjärn" 2013 217 27.1856667504885 0 40.9709387337103 0 52.7318434174565 0 NA NA NA NA NA NA
"1672" "Stortjärn" 2013 218 31.9356418862004 0 44.6168938517558 0 64.4150083380441 0 NA NA NA NA NA NA
"1673" "Stortjärn" 2013 219 29.7388238542383 0 45.029306002579 0 52.0223809350771 0 NA NA NA NA NA NA
"1674" "Stortjärn" 2013 220 40.9598860994473 0 61.2282495442978 0 79.8373981759261 0 NA NA NA NA NA NA
"1675" "Stortjärn" 2013 221 59.7507758917131 0 83.2376609929093 0 119.342611894956 0 NA NA NA NA NA NA
"1676" "Stortjärn" 2013 222 39.361642559814 0 59.5100411934462 0 71.1406598101581 0 NA NA NA NA NA NA
"1677" "Stortjärn" 2013 223 45.5345483732742 0 70.2997119893239 0 82.6670997049243 0 NA NA NA NA NA NA
"1678" "Stortjärn" 2013 224 53.2407735240762 0 81.031625174762 0 107.427774177203 0 NA NA NA NA NA NA
"1679" "Stortjärn" 2013 225 54.47833251713 0 80.7292069420021 0 106.063009287968 0 NA NA NA NA NA NA
"1680" "Stortjärn" 2013 226 53.4045224213434 0 80.0398301611943 0 109.186083047045 0 49.851756457627 0 75.4539894664483 0 84.107672088447 0
"1681" "Stortjärn" 2013 227 60.493651672198 0 84.3430499263936 0 120.949702225021 0 NA NA NA NA NA NA
"1682" "Stortjärn" 2013 228 46.9897450615313 0 70.8518521470064 0 93.7002722419563 0 NA NA NA NA NA NA
"1683" "Stortjärn" 2013 229 55.6631512360661 0 79.1450549719181 0 108.662154802405 0 NA NA NA NA NA NA
"1684" "Stortjärn" 2013 230 56.8205081630439 0 77.5418133569604 0 113.201331705522 0 NA NA NA NA NA NA
"1685" "Stortjärn" 2013 231 40.3403068626351 0 59.4277048931149 0 77.2999838379985 0 NA NA NA NA NA NA
"1686" "Stortjärn" 2013 232 35.0547475900058 0 52.1924559921717 0 72.6875200359529 0 NA NA NA NA NA NA
"1687" "Stortjärn" 2013 233 31.6042491671544 0 46.2483285521189 0 64.8465544125722 0 NA NA NA NA NA NA
"1688" "Stortjärn" 2013 234 50.1751461280471 0 73.1448761799434 0 105.747297676034 0 NA NA NA NA NA NA
"1689" "Stortjärn" 2013 235 34.7762711833482 0 49.8386179355407 0 60.0875825136313 0 NA NA NA NA NA NA
"1690" "Stortjärn" 2013 236 32.6231855723382 0 45.5691897255584 0 59.9029336939033 0 NA NA NA NA NA NA
"1691" "Stortjärn" 2013 237 33.3375476843944 0 46.9853765013023 0 59.01310936745 0 NA NA NA NA NA NA
"1692" "Stortjärn" 2013 238 30.4472577549678 0 46.7037842975067 0 60.0780394047423 0 NA NA NA NA NA NA
"1693" "Stortjärn" 2013 239 26.9252605869835 0 37.8556571238485 0 51.1773894884859 0 NA NA NA NA NA NA
"1694" "Stortjärn" 2013 240 41.1391330794554 0 59.9700038280031 0 86.1620674686959 0 57.5902114121918 0 81.9847408727131 0 104.403390712087 0
"1695" "Stortjärn" 2013 241 40.7279816697044 0 62.524525471925 0 86.1289377746028 0 NA NA NA NA NA NA
"1696" "Stortjärn" 2013 242 30.1110760740004 0 43.0299463345296 0 54.3103722590484 0 NA NA NA NA NA NA
"1697" "Stortjärn" 2013 243 33.5622007837816 0 48.3877035419885 0 66.7773680088496 0 NA NA NA NA NA NA
"1698" "Stortjärn" 2013 244 51.2397583184722 0 75.3636585491801 0 103.188003825803 0 NA NA NA NA NA NA
"1699" "Stortjärn" 2013 245 39.6899927284063 0 61.2508775983445 0 77.6991990730261 0 NA NA NA NA NA NA
"1700" "Stortjärn" 2013 246 35.5393086895748 0 54.278093230068 0 70.021938860335 0 NA NA NA NA NA NA
"1701" "Stortjärn" 2013 247 34.2523240573627 0 52.9268137586883 0 70.0434392214837 0 NA NA NA NA NA NA
"1702" "Stortjärn" 2013 248 43.3499960080983 0 64.7163569120275 0 88.9784709889318 0 NA NA NA NA NA NA
"1703" "Stortjärn" 2013 249 48.1990201608236 0 68.1346558809451 0 97.2047689242358 0 NA NA NA NA NA NA
"1704" "Stortjärn" 2013 250 34.7443472387857 0 53.5393115521432 0 66.9477959875635 0 NA NA NA NA NA NA
"1705" "Stortjärn" 2013 251 33.0477000390595 0 50.9478767849695 0 63.168831732209 0 NA NA NA NA NA NA
"1706" "Stortjärn" 2013 252 31.2286698543267 0 47.92657102226 0 60.9097903503516 0 NA NA NA NA NA NA
"1707" "Stortjärn" 2013 253 28.843157298538 0 44.9603911030954 0 54.6953093722378 0 NA NA NA NA NA NA
"1708" "Stortjärn" 2013 254 28.8311304963955 0 44.2159281425193 0 54.6331593697203 0 25.6571021088252 0 40.1060889413929 0 35.2116226189915 0
"1709" "Stortjärn" 2013 255 34.2075422808373 0 51.879655036567 0 65.4919234638686 0 NA NA NA NA NA NA
"1710" "Stortjärn" 2013 256 47.1930665567482 0 69.0839727726056 0 97.1745106091023 0 NA NA NA NA NA NA
"1711" "Stortjärn" 2013 257 49.569337225391 0 73.1932402401093 0 100.128766246583 0 NA NA NA NA NA NA
"1712" "Stortjärn" 2013 258 69.1879169053923 0 91.9131665676152 0 136.138676796367 0 NA NA NA NA NA NA
"1713" "Stortjärn" 2013 259 78.6543790431727 0 105.40836693275 0 156.79768027696 0 NA NA NA NA NA NA
"1714" "Stortjärn" 2013 260 77.3642151750153 0 109.326082471563 0 156.289446894111 0 NA NA NA NA NA NA
"1715" "Stortjärn" 2013 261 96.8503505301677 0 128.018893740206 0 190.679331808249 0 NA NA NA NA NA NA
"1716" "Stortjärn" 2013 262 80.9396188637839 0 110.756425199564 0 159.060734027229 0 NA NA NA NA NA NA
"1717" "Stortjärn" 2013 263 58.0737947623987 0 87.0317149298729 0 113.909075164722 0 NA NA NA NA NA NA
"1718" "Stortjärn" 2013 264 43.6166682619709 0 67.8355623599445 0 85.2478343523855 0 NA NA NA NA NA NA
"1719" "Stortjärn" 2013 265 69.4046867129703 0 101.795932674261 0 147.484816960445 0 NA NA NA NA NA NA
"1720" "Stortjärn" 2013 266 97.6490506718961 0 134.26212320877 0 200.976528126942 0 NA NA NA NA NA NA
"1721" "Stortjärn" 2013 267 116.110022467068 0 153.55414465331 0 240.982355430826 0 NA NA NA NA NA NA
"1722" "Stortjärn" 2013 268 108.873924281406 0 147.65080721853 0 227.875149117484 0 129.210495130075 0 165.246731331985 0 241.238695061311 0
"1723" "Stortjärn" 2013 269 98.8848910873871 0 132.054948008657 0 203.930255183597 0 NA NA NA NA NA NA
"1724" "Stortjärn" 2013 270 82.4777802877747 0 111.351005308898 0 162.549839279086 0 NA NA NA NA NA NA
"1725" "Stortjärn" 2013 271 61.0152742705314 0 88.8908345635324 0 119.30237837135 0 NA NA NA NA NA NA
"1726" "Stortjärn" 2013 272 41.5616262419445 0 63.6158204821106 0 74.0885666599843 0 NA NA NA NA NA NA
"1727" "Stortjärn" 2013 273 40.588433110404 0 60.5171439254265 0 65.8236488334074 0 NA NA NA NA NA NA
"1730" "Stortjärn" 2014 152 49.5838374303503 0 74.4176512127223 0 89.3005062687164 0 NA NA NA NA NA NA
"1731" "Stortjärn" 2014 153 46.9063370808409 0 71.2537764265409 0 92.7920439740731 0 NA NA NA NA NA NA
"1732" "Stortjärn" 2014 154 43.2975416779048 0 64.4495544928301 0 87.0075767638929 0 NA NA NA NA NA NA
"1733" "Stortjärn" 2014 155 40.1673726719922 0 61.821458250412 0 73.2502585738114 0 NA NA NA NA NA NA
"1734" "Stortjärn" 2014 156 38.816847520061 0 58.4250871682258 0 65.6171361947853 0.0490562344385971 NA NA NA NA NA NA
"1735" "Stortjärn" 2014 157 44.2139724893516 0 64.8745410791862 0 80.8927126852632 0 NA NA NA NA NA NA
"1736" "Stortjärn" 2014 158 35.0731360333321 0 52.4561284922156 0 59.0078559255401 0.0422116462421321 NA NA NA NA NA NA
"1737" "Stortjärn" 2014 159 33.0553438476882 0 49.5366401082997 0 49.4767545997218 0 NA NA NA NA NA NA
"1738" "Stortjärn" 2014 160 49.5394566137279 0 74.5134255454806 0 92.8104849509849 0 NA NA NA NA NA NA
"1739" "Stortjärn" 2014 161 44.4863899883918 0 68.7722260815378 0 74.1954266441342 0 NA NA NA NA NA NA
"1740" "Stortjärn" 2014 162 50.8125684132118 0 75.2594295490612 0 95.8183397741186 0.0059849233106906 57.3324738193521 0 80.5365417313722 0 105.26731332851 0.0593271066586089
"1741" "Stortjärn" 2014 163 59.0042716557804 0 85.8942244995097 0 112.145582797688 0 NA NA NA NA NA NA
"1742" "Stortjärn" 2014 164 75.4090021487361 0 99.2276176717163 0 149.616114410493 0 NA NA NA NA NA NA
"1743" "Stortjärn" 2014 165 64.7352573373915 0 92.8745459816456 0 127.991198837426 0.0368090848000608 NA NA NA NA NA NA
"1744" "Stortjärn" 2014 166 57.2938014646151 0 83.9019571873355 0 114.677578684557 0 NA NA NA NA NA NA
"1745" "Stortjärn" 2014 167 77.1867192938831 0 100.88357268327 0 155.377067887329 0.0254174442173712 NA NA NA NA NA NA
"1746" "Stortjärn" 2014 168 57.9160081459542 0 86.03153109825 0 117.539153768082 0 NA NA NA NA NA NA
"1747" "Stortjärn" 2014 169 75.495340228471 0 103.053257850022 0 147.636438214286 0 NA NA NA NA NA NA
"1748" "Stortjärn" 2014 170 49.7852654316815 0 74.8281358960939 0 92.0578029416383 0.0313731186229608 NA NA NA NA NA NA
"1749" "Stortjärn" 2014 171 45.9730000934796 0 69.7456618105805 0 89.7503253260553 0 NA NA NA NA NA NA
"1750" "Stortjärn" 2014 172 47.0066154351792 0 70.997075793127 0 88.9118396167547 0 NA NA NA NA NA NA
"1751" "Stortjärn" 2014 173 51.1378308072754 0 76.8079544402087 0 101.052852617502 0 NA NA NA NA NA NA
"1752" "Stortjärn" 2014 174 70.2570070975787 0 95.0952323110187 0 138.572327177143 0 NA NA NA NA NA NA
"1753" "Stortjärn" 2014 175 57.8780790580492 0 81.5346654653175 0 112.59605862777 0 NA NA NA NA NA NA
"1754" "Stortjärn" 2014 176 49.044100150564 0 72.4544568892652 0 98.5684900891851 0 55.5542086055714 0 78.419745224895 0 101.65082666176 0
"1755" "Stortjärn" 2014 177 33.5683834912611 0 51.2495161639373 0 62.6335267453188 0 NA NA NA NA NA NA
"1756" "Stortjärn" 2014 178 36.3216046933151 0 55.0375690199488 0 69.0241558290706 0 NA NA NA NA NA NA
"1757" "Stortjärn" 2014 179 36.9562112559399 0 56.152432379412 0 74.3850085767749 0 NA NA NA NA NA NA
"1758" "Stortjärn" 2014 180 42.9984209692495 0 64.3156101562812 0 88.7634609065539 0 NA NA NA NA NA NA
"1759" "Stortjärn" 2014 181 39.2535296652351 0 59.0610371392764 0 77.6662050917767 0 NA NA NA NA NA NA
"1760" "Stortjärn" 2014 182 35.491778233065 0 52.178737017226 0 70.1217654021481 0 NA NA NA NA NA NA
"1761" "Stortjärn" 2014 183 51.011855817354 0 71.167238430103 0 104.411483036211 0 NA NA NA NA NA NA
"1762" "Stortjärn" 2014 184 39.4457462799856 0 59.1735232615643 0 75.0191561463666 0 NA NA NA NA NA NA
"1763" "Stortjärn" 2014 185 35.2233215900542 0 54.0176501396025 0 64.7834949308083 0 NA NA NA NA NA NA
"1764" "Stortjärn" 2014 186 43.9905877280107 0 63.1141396000572 0 89.0648747966453 0 NA NA NA NA NA NA
"1765" "Stortjärn" 2014 187 36.9158983469249 0 54.4203054230804 0 74.4989801960705 0 NA NA NA NA NA NA
"1766" "Stortjärn" 2014 188 34.6060996723115 0 51.8748437189564 0 67.1264437097172 0 NA NA NA NA NA NA
"1767" "Stortjärn" 2014 189 29.2088218370899 0 45.2828364965186 0 48.9096500137614 0 NA NA NA NA NA NA
"1768" "Stortjärn" 2014 190 32.3892528609012 0 48.1205695362298 0 61.0120441211937 3.19732385373468 39.3119920138074 0 59.3890274734318 0 68.8082533665483 0.0678706704393158
"1769" "Stortjärn" 2014 191 44.6290981298586 0 66.3482977076835 0 93.5465593748046 8.5693020763643 NA NA NA NA NA NA
"1770" "Stortjärn" 2014 192 36.018148398122 0 53.7337706472825 0 73.3505758147175 8.97412784852978 NA NA NA NA NA NA
"1771" "Stortjärn" 2014 193 34.6276384490089 0 51.902785167153 0 72.0757487585822 7.15554516975469 NA NA NA NA NA NA
"1772" "Stortjärn" 2014 194 31.3585024965058 0 47.2838029694626 0 62.5597497329805 6.63264177678951 NA NA NA NA NA NA
"1773" "Stortjärn" 2014 195 41.7471537210974 0 61.420450924329 0 82.7072163651069 6.31900060913628 NA NA NA NA NA NA
"1774" "Stortjärn" 2014 196 31.8747996337201 0 49.3917845704503 0 62.5921351863216 6.19306221035377 NA NA NA NA NA NA
"1775" "Stortjärn" 2014 197 28.7797248652677 0 44.3419775854248 0 53.2417379729612 7.19008033818499 NA NA NA NA NA NA
"1776" "Stortjärn" 2014 198 30.5605926776271 0 45.6080220642862 0 51.143050371922 6.5578485255444 NA NA NA NA NA NA
"1777" "Stortjärn" 2014 199 30.4886047628045 0 46.4650844421329 0 56.24811460749 6.27660135675768 NA NA NA NA NA NA
"1778" "Stortjärn" 2014 200 30.8715383009063 0 47.5009681480648 0 57.3956498519684 6.20672834901667 NA NA NA NA NA NA
"1779" "Stortjärn" 2014 201 30.4197114434783 0 46.6325501059236 0 60.9403276134132 6.80239660194746 NA NA NA NA NA NA
"1780" "Stortjärn" 2014 202 32.4847737275776 0 50.3554344939547 0 66.005862958848 8.53911532217871 NA NA NA NA NA NA
"1781" "Stortjärn" 2014 203 29.22119520338 0 44.0198071410585 0 52.1909485444806 9.49945337538648 NA NA NA NA NA NA
"1782" "Stortjärn" 2014 204 38.9507566708048 0 57.3246734594521 0 77.5116658891505 7.26187292112503 NA NA NA NA NA NA
"1783" "Stortjärn" 2014 205 39.4638017366545 0 59.9002881103782 0 77.0418873311316 9.68015627153104 33.4542318418003 0 51.9761116362287 0 50.6026158128238 3.42216971665532
"1784" "Stortjärn" 2014 206 30.516372649265 0 45.6467526577205 0 58.3735858503842 10.5376759848693 NA NA NA NA NA NA
"1785" "Stortjärn" 2014 207 33.1402399731906 0 50.0413824738491 0 65.8395796206009 9.1662704797195 NA NA NA NA NA NA
"1786" "Stortjärn" 2014 208 42.7031695304374 0 61.2714309739133 0 83.7851890956911 9.20590384319858 NA NA NA NA NA NA
"1787" "Stortjärn" 2014 209 35.4589046628085 0 54.115827063622 0 67.9840428176079 8.64475315650577 NA NA NA NA NA NA
"1788" "Stortjärn" 2014 210 50.7182155174341 0 76.545707566882 0 103.927800589776 7.81318453680048 NA NA NA NA NA NA
"1789" "Stortjärn" 2014 211 72.6912324843175 0 102.303977947561 0 148.458996574729 8.03700206338912 NA NA NA NA NA NA
"1790" "Stortjärn" 2014 212 58.7659960116088 0 84.7193905825455 0 115.631135060918 7.25625175746458 NA NA NA NA NA NA
"1791" "Stortjärn" 2014 213 53.5477630757372 0 80.1143564114281 0 105.965495566852 8.48203064302129 NA NA NA NA NA NA
"1792" "Stortjärn" 2014 214 54.9333961729187 0 81.9737614458497 0 109.330437976171 8.02714416979922 NA NA NA NA NA NA
"1793" "Stortjärn" 2014 215 55.3725464546192 0 80.4183817608431 0 111.660535783242 6.55913511533283 NA NA NA NA NA NA
"1794" "Stortjärn" 2014 216 56.3944209305396 0 81.1007654449694 0 114.880406291624 5.79224059583377 NA NA NA NA NA NA
"1795" "Stortjärn" 2014 217 45.8527394012304 0 67.0424731980658 0 91.5735684891971 5.75241825257365 NA NA NA NA NA NA
"1796" "Stortjärn" 2014 218 39.9991010588156 0 57.7812421786192 0 80.5593674261642 6.24924440824338 31.3232252649916 0 47.8033232277301 0 50.7200908525755 0.565861882128979
"1797" "Stortjärn" 2014 219 42.8676610104377 0 62.5311470562819 0 87.2859205415667 6.94359790299215 NA NA NA NA NA NA
"1798" "Stortjärn" 2014 220 30.4668025316815 0 45.8471212293762 0 57.6158836481533 6.89342441633525 NA NA NA NA NA NA
"1799" "Stortjärn" 2014 221 38.9315683066272 0 58.6472738671791 0 79.8577151768725 6.17996014768809 NA NA NA NA NA NA
"1800" "Stortjärn" 2014 222 48.4475568560869 0 73.9426320917473 0 100.960571320622 8.16701912444363 NA NA NA NA NA NA
"1801" "Stortjärn" 2014 223 49.1016314549987 0 74.3432110638466 0 97.3974897273876 7.26265365556571 NA NA NA NA NA NA
"1802" "Stortjärn" 2014 224 67.7107819147694 0 96.1486180817659 0 139.277965987185 7.55207977986172 NA NA NA NA NA NA
"1803" "Stortjärn" 2014 225 63.9936267274933 0 94.636578347965 0 135.665809651946 7.61888583009693 NA NA NA NA NA NA
"1804" "Stortjärn" 2014 226 55.4623675985056 0 82.2564773489146 0 116.509242223008 7.21447865083198 NA NA NA NA NA NA
"1805" "Stortjärn" 2014 227 54.0015933041073 0 80.7006238936346 0 115.654553883139 6.55509854378843 NA NA NA NA NA NA
"1806" "Stortjärn" 2014 228 65.4854277428288 0 99.3089695259391 0 139.84663149677 6.0363379276665 NA NA NA NA NA NA
"1807" "Stortjärn" 2014 229 54.1768846969677 0 82.3056351680491 0 107.62414975848 7.00815975175228 NA NA NA NA NA NA
"1808" "Stortjärn" 2014 230 89.0076514421477 0 122.73971648836 0 183.675220113956 6.20078164145494 NA NA NA NA NA NA
"1809" "Stortjärn" 2014 231 51.2690218377321 0 79.8123160809333 0 99.3570987554232 5.74914793745382 NA NA NA NA NA NA
"1810" "Stortjärn" 2014 232 51.7013163342719 0 79.8469532539581 0 100.251562910207 3.12501317623724 46.7851737163222 0 72.7953582224562 0 61.3394175254331 0.258418602596085
"1811" "Stortjärn" 2014 233 46.4994612007972 0 71.2005542632379 0 89.9252588711576 0 NA NA NA NA NA NA
"1812" "Stortjärn" 2014 234 52.151281046595 0 81.5204465566728 0 98.2619821660155 0 NA NA NA NA NA NA
"1813" "Stortjärn" 2014 235 53.1076769237516 0 82.4436907171856 0 104.082856042975 0 NA NA NA NA NA NA
"1814" "Stortjärn" 2014 236 68.4591231674166 0 102.122601093822 0 139.161635287825 0 NA NA NA NA NA NA
"1815" "Stortjärn" 2014 237 76.4139703170263 0 114.914928721608 0 152.338622537719 0 NA NA NA NA NA NA
"1816" "Stortjärn" 2014 238 110.505252659361 0 149.920116313187 0 219.932645652765 0 NA NA NA NA NA NA
"1817" "Stortjärn" 2014 239 121.389172576755 0 158.835031738436 0 238.081785193634 0 NA NA NA NA NA NA
"1818" "Stortjärn" 2014 240 98.5012068251978 0 136.496345455493 0 194.606642246166 0 NA NA NA NA NA NA
"1819" "Stortjärn" 2014 241 73.3071293626314 0 109.772587464106 0 143.453945009663 0 NA NA NA NA NA NA
"1820" "Stortjärn" 2014 242 53.2816057074614 0 80.2129480972304 0 99.0597230153031 0 NA NA NA NA NA NA
"1821" "Stortjärn" 2014 243 57.5401359209343 0 87.9155560860237 0 115.990068786224 0 NA NA NA NA NA NA
"1822" "Stortjärn" 2014 244 66.1366336628435 0 98.6225457342302 0 138.026161038567 0 NA NA NA NA NA NA
"1823" "Stortjärn" 2014 245 58.9997592249527 0 88.6305167378824 0 116.616682691313 0 NA NA NA NA NA NA
"1824" "Stortjärn" 2014 246 77.2443188925239 0 113.385434666656 0 155.624897985158 0 102.066897696933 0 138.942239945498 0 190.960562278752 0
"1825" "Stortjärn" 2014 247 62.9939381677437 0 93.0513423767757 0 125.996977284097 0 NA NA NA NA NA NA
"1826" "Stortjärn" 2014 248 56.1171255326259 0 87.0918787581714 0 107.826268935788 0 NA NA NA NA NA NA
"1827" "Stortjärn" 2014 249 45.66193377408 0 69.1618356485555 0 87.2999742054318 0 NA NA NA NA NA NA
"1828" "Stortjärn" 2014 250 45.8452501126079 0 69.1589873922458 0 93.1349782332235 0 NA NA NA NA NA NA
"1829" "Stortjärn" 2014 251 44.5419942095104 0 66.5981895882566 0 85.4619338066179 0 NA NA NA NA NA NA
"1830" "Stortjärn" 2014 252 45.2498061038887 0 67.6955616630427 0 78.0223573417174 0 NA NA NA NA NA NA
"1831" "Stortjärn" 2014 253 54.7279167129959 0 83.3945041197084 0 108.611960907781 0 NA NA NA NA NA NA
"1832" "Stortjärn" 2014 254 65.7137557789509 0 97.929282581333 0 136.067814575374 0 NA NA NA NA NA NA
"1833" "Stortjärn" 2014 255 61.0663599334057 0 92.7154894249631 0 124.252983523195 0 NA NA NA NA NA NA
"1834" "Stortjärn" 2014 256 54.5628195729437 0 80.2763822649359 0 114.382521762929 0 NA NA NA NA NA NA
"1835" "Stortjärn" 2014 257 63.2019509781543 0 95.4365294238179 0 133.09107036947 0 NA NA NA NA NA NA
"1836" "Stortjärn" 2014 258 48.518447583684 0 74.2741200839888 0 98.4955479737171 0 NA NA NA NA NA NA
"1837" "Stortjärn" 2014 259 49.6716375838884 0 74.8818895643078 0 96.0805327704951 0 NA NA NA NA NA NA
"1838" "Stortjärn" 2014 260 51.3908362043923 0 79.2302277790883 0 97.7422756229291 0 NA NA NA NA NA NA
"1839" "Stortjärn" 2014 261 49.2875848348268 0 72.6587579968949 0 88.5099941417367 0 41.9925830676938 0 58.2789812671254 0 19.2749362299017 0
"1840" "Stortjärn" 2014 262 48.8048078787456 0 73.8030101500154 0 91.2323318366734 0 NA NA NA NA NA NA
"1841" "Stortjärn" 2014 263 49.2642474073182 0 74.9568579324603 0 97.7043683238668 0 NA NA NA NA NA NA
"1842" "Stortjärn" 2014 264 77.1905849608602 0 107.517741387891 0 153.533476519549 0 NA NA NA NA NA NA
"1843" "Stortjärn" 2014 265 99.1308861874791 0 143.033688734874 0 217.773494511771 0 NA NA NA NA NA NA
"1844" "Stortjärn" 2014 266 125.043769146005 0 168.534186194109 0 261.062724531174 0 NA NA NA NA NA NA
"1845" "Stortjärn" 2014 267 98.1454111926154 0 142.037445899531 0 207.932506912254 2.80896842639966 NA NA NA NA NA NA
"1846" "Stortjärn" 2014 268 65.9672088223627 0 97.7147956819296 0 138.657794765349 8.16495204985541 NA NA NA NA NA NA
"1847" "Stortjärn" 2014 269 89.9415826352655 0 121.511523673839 0 175.237341607079 3.8089856063629 NA NA NA NA NA NA
"1848" "Stortjärn" 2014 270 91.1795975421661 0 116.654224724594 0 175.033595698553 2.58762189358967 NA NA NA NA NA NA
"1849" "Stortjärn" 2014 271 52.1111260076662 0 73.7688639893101 0 96.7602272187723 1.39074041816651 NA NA NA NA NA NA
"1850" "Stortjärn" 2014 272 60.884513998869 0 76.6078900910191 0 115.271624712909 1.33409625859928 NA NA NA NA NA NA
"1851" "Stortjärn" 2014 273 28.6074373929004 0 42.211327157799 0 52.8182020693103 1.30332429048226 NA NA NA NA NA NA
"1854" "Stortjärn" 2015 152 80.4830440592307 0 103.596337875201 0 149.454668591987 0 NA NA NA NA NA NA
"1855" "Stortjärn" 2015 153 88.547815884106 0 112.371423115452 0 168.598231482808 0 NA NA NA NA NA NA
"1856" "Stortjärn" 2015 154 52.598969551098 0 78.6653873468997 0 99.2915793515364 0 NA NA NA NA NA NA
"1857" "Stortjärn" 2015 155 65.8592875641026 0 89.1014085426042 0 127.858682178007 0 NA NA NA NA NA NA
"1858" "Stortjärn" 2015 156 65.615440697583 0 87.4952884877505 0 129.760070897567 0 NA NA NA NA NA NA
"1859" "Stortjärn" 2015 157 45.4786269783237 0 66.3152859974843 0 91.2737786216646 0 NA NA NA NA NA NA
"1860" "Stortjärn" 2015 158 51.7558563405928 0 74.9177888665067 0 100.548542083299 0 NA NA NA NA NA NA
"1861" "Stortjärn" 2015 159 50.9105319315746 0 73.356414410064 0 101.906605812678 0 NA NA NA NA NA NA
"1862" "Stortjärn" 2015 160 52.0082774365338 0 73.6563616116753 0 104.11892763733 0 44.3202406474999 0 62.7106128710372 0 81.0765147997654 0
"1863" "Stortjärn" 2015 161 59.7449072950591 0 78.1876663525905 0 116.67989985749 0 NA NA NA NA NA NA
"1864" "Stortjärn" 2015 162 53.0125958994609 0 70.9998288064662 0 106.061361489905 0 NA NA NA NA NA NA
"1865" "Stortjärn" 2015 163 44.3320547217137 0 60.9598945896959 0 88.3181396730246 0 NA NA NA NA NA NA
"1866" "Stortjärn" 2015 164 38.3150734438167 0 55.3938758810127 0 76.3024659249832 0 NA NA NA NA NA NA
"1867" "Stortjärn" 2015 165 30.1994391386624 0 45.7378387933001 0 57.3987428150341 0 NA NA NA NA NA NA
"1868" "Stortjärn" 2015 166 47.2403897114533 0 64.5509202601829 0 93.004056584395 0 NA NA NA NA NA NA
"1869" "Stortjärn" 2015 167 51.2340764537604 0 66.7153614321227 0 103.489324377801 0 NA NA NA NA NA NA
"1870" "Stortjärn" 2015 168 30.3871845905892 0 45.7274750015338 0 57.3290043955589 0 NA NA NA NA NA NA
"1871" "Stortjärn" 2015 169 30.2642268626737 0 45.7121527336356 0 55.3996807820534 0 NA NA NA NA NA NA
"1872" "Stortjärn" 2015 170 36.0737740554056 0 53.1022981615883 0 65.7301304562461 0 NA NA NA NA NA NA
"1873" "Stortjärn" 2015 171 34.9537863562189 0 52.9152078103473 0 64.7866622227889 0 NA NA NA NA NA NA
"1874" "Stortjärn" 2015 172 40.1653416282632 0 59.5120024516284 0 77.3472507940899 0 NA NA NA NA NA NA
"1875" "Stortjärn" 2015 173 36.4030746663076 0 54.145180971743 0 68.5683180708882 0 NA NA NA NA NA NA
"1876" "Stortjärn" 2015 174 28.4979773385702 0 44.2941839335421 0 48.8912681040662 0 21.192655074034 0 32.6900218630426 0 24.7675459749626 0
"1877" "Stortjärn" 2015 175 39.4907792253517 0 53.7052153909128 0 72.8059642077235 0 NA NA NA NA NA NA
"1878" "Stortjärn" 2015 176 35.2885054843411 0 53.2202136012114 0 67.8209653537704 0 NA NA NA NA NA NA
"1879" "Stortjärn" 2015 177 29.201650455789 0 45.4692504342926 0 50.0313563739936 0 NA NA NA NA NA NA
"1880" "Stortjärn" 2015 178 32.6199159953871 0 49.3199214346267 0 59.916721544923 0 NA NA NA NA NA NA
"1881" "Stortjärn" 2015 179 31.4851127472859 0 47.7343866163834 0 58.5080404163427 0 NA NA NA NA NA NA
"1882" "Stortjärn" 2015 180 31.4964727773544 0 47.6748634927484 0 56.6194387636415 0 NA NA NA NA NA NA
"1883" "Stortjärn" 2015 181 33.8544173957795 0 50.1146152206048 0 62.4996463016516 0 NA NA NA NA NA NA
"1884" "Stortjärn" 2015 182 30.6326642696972 0 47.2299539162462 0 54.5001119196917 0 NA NA NA NA NA NA
"1885" "Stortjärn" 2015 183 34.1986053027146 0 52.814626056379 0 62.2958747247754 0 NA NA NA NA NA NA
"1886" "Stortjärn" 2015 184 34.5636302839812 0 51.3232913984769 0 59.9667475793313 0 NA NA NA NA NA NA
"1887" "Stortjärn" 2015 185 44.5138291731599 0 63.6593621861616 0 89.4463214835972 0 NA NA NA NA NA NA
"1888" "Stortjärn" 2015 186 38.7938511999857 0 59.6030129194791 0 77.2333309485381 0 NA NA NA NA NA NA
"1889" "Stortjärn" 2015 187 50.3724023383628 0 73.7858149491404 0 103.624669919413 0 NA NA NA NA NA NA
"1890" "Stortjärn" 2015 188 45.5543298029793 0 68.9619460242775 0 86.6101608334022 0 NA NA NA NA NA NA
"1891" "Stortjärn" 2015 189 46.7341700405739 0 72.2699870525067 0 84.8108115836906 0 NA NA NA NA NA NA
"1892" "Stortjärn" 2015 190 68.712545143368 0 94.793124546481 0 137.991558031359 0 72.3134714848335 0 98.969939355701 0 137.713124727726 0
"1893" "Stortjärn" 2015 191 79.4524452101151 0 104.533154078584 0 152.396277796187 0 NA NA NA NA NA NA
"1894" "Stortjärn" 2015 192 48.9754252874678 0 73.5032338420269 0 89.8600344757817 0 NA NA NA NA NA NA
"1895" "Stortjärn" 2015 193 41.0594676146506 0 63.9389402126396 0 75.9408764121766 0 NA NA NA NA NA NA
"1896" "Stortjärn" 2015 194 44.9144950678282 0 67.3009722546387 0 85.2107582423968 0 NA NA NA NA NA NA
"1897" "Stortjärn" 2015 195 41.0430384728536 0 63.0063892496052 0 82.865890505276 0 NA NA NA NA NA NA
"1898" "Stortjärn" 2015 196 37.8984120228037 0 58.9052396377915 0 74.7840091047264 0 NA NA NA NA NA NA
"1899" "Stortjärn" 2015 197 34.0238875922255 0 50.0428755786907 0 53.7739763391417 0 NA NA NA NA NA NA
"1900" "Stortjärn" 2015 198 51.8479241488446 0 75.7350211451904 0 100.760423415744 0 NA NA NA NA NA NA
"1901" "Stortjärn" 2015 199 57.9729929510192 0 81.9164978237239 0 116.301541748591 0 NA NA NA NA NA NA
"1902" "Stortjärn" 2015 200 50.9499691491975 0 76.4358679027636 0 98.3193844126714 0 NA NA NA NA NA NA
"1903" "Stortjärn" 2015 201 64.4501360223906 0 92.2941219082951 0 131.834624855912 0 NA NA NA NA NA NA
"1904" "Stortjärn" 2015 202 48.7528296177415 0 74.6825434063102 0 95.2633564914965 0 36.7859526703485 0 56.7830296928524 0 43.1805128946077 0
"1905" "Stortjärn" 2015 203 44.8274687022747 0 68.2153916640795 0 86.2887788015313 0 NA NA NA NA NA NA
"1906" "Stortjärn" 2015 204 41.4182207498798 0 62.787374350205 0 81.414784152236 0 NA NA NA NA NA NA
"1907" "Stortjärn" 2015 205 46.120415961194 0 68.0448049639459 0 90.2889252128667 0 NA NA NA NA NA NA
"1908" "Stortjärn" 2015 206 47.5437163134503 0 72.2709083859868 0 97.2229897138683 0 NA NA NA NA NA NA
"1909" "Stortjärn" 2015 207 79.2655806631308 0 105.252165258649 0 161.514912619353 0 NA NA NA NA NA NA
"1910" "Stortjärn" 2015 208 67.5980408175633 0 97.2743776295937 0 131.70279460149 0 NA NA NA NA NA NA
"1911" "Stortjärn" 2015 209 50.934321511334 0 75.8841739393286 0 97.6208962391314 0 NA NA NA NA NA NA
"1912" "Stortjärn" 2015 210 41.3727618347224 0 63.5486142802817 0 80.4410996440737 0 NA NA NA NA NA NA
"1913" "Stortjärn" 2015 211 35.1788199044291 0 54.6414261017438 0 66.6376644685793 0 NA NA NA NA NA NA
"1914" "Stortjärn" 2015 212 35.0610057554241 0 53.5586707785233 0 65.5062675559405 0 NA NA NA NA NA NA
"1915" "Stortjärn" 2015 213 43.3873373266413 0 65.5882768226827 0 88.6014787789636 0 NA NA NA NA NA NA
"1916" "Stortjärn" 2015 214 40.7438162341892 0 63.5977442282909 0 78.1581773232144 0 NA NA NA NA NA NA
"1917" "Stortjärn" 2015 215 48.9661146720006 0 73.802483115075 0 98.0960703259243 0 NA NA NA NA NA NA
"1918" "Stortjärn" 2015 216 44.3161527916681 0 67.8348806263133 0 85.899696443127 0 NA NA NA NA NA NA
"1919" "Stortjärn" 2015 217 53.4997682354495 0 79.7447495033963 0 111.561724722878 0 NA NA NA NA NA NA
"1920" "Stortjärn" 2015 218 39.4154187023141 0 60.7344524446493 0 64.9080215541243 0 37.1946372140586 0 56.893433991613 0 37.5035168343211 0
"1921" "Stortjärn" 2015 219 43.9042560144161 0 64.2315807966291 0 84.2598076691251 0 NA NA NA NA NA NA
"1922" "Stortjärn" 2015 220 41.1900798318101 0 62.3022401604087 0 85.4668343661019 0 NA NA NA NA NA NA
"1923" "Stortjärn" 2015 221 41.5826331932771 0 62.2328339900976 0 79.985325145868 0 NA NA NA NA NA NA
"1924" "Stortjärn" 2015 222 47.5752840868025 0 72.5284552292521 0 96.7393015188957 0 NA NA NA NA NA NA
"1925" "Stortjärn" 2015 223 46.0292431657405 0 69.0887888287632 0 92.1454099164907 0 NA NA NA NA NA NA
"1926" "Stortjärn" 2015 224 57.2482489833462 0 84.879887895429 0 116.876807623744 0 NA NA NA NA NA NA
"1927" "Stortjärn" 2015 225 79.9935027741378 0 112.36211847084 0 165.183127100953 0 NA NA NA NA NA NA
"1928" "Stortjärn" 2015 226 60.577805762489 0 93.0765797030064 0 121.629860961565 0 NA NA NA NA NA NA
"1929" "Stortjärn" 2015 227 63.7773408015577 0 96.2263601738822 0 131.55390901971 0 NA NA NA NA NA NA
"1930" "Stortjärn" 2015 228 59.6509220932854 0 91.5780052241943 0 124.04247264826 0 NA NA NA NA NA NA
"1931" "Stortjärn" 2015 229 50.8336548379468 0 76.141486534867 0 109.848747408513 0 NA NA NA NA NA NA
"1932" "Stortjärn" 2015 230 41.5704133217 0 61.1869376790091 0 91.7388215292016 0 31.0823782861365 0 48.8508581168461 0 42.9727327776744 0
"1933" "Stortjärn" 2015 231 44.5833023895907 0 66.1671624241615 0 98.1054950963291 0 NA NA NA NA NA NA
"1934" "Stortjärn" 2015 232 43.4956792321357 0 64.638575742094 0 94.7981635800171 0 NA NA NA NA NA NA
"1935" "Stortjärn" 2015 233 38.1506901604401 0 57.5750438089375 0 82.6344819838951 0 NA NA NA NA NA NA
"1936" "Stortjärn" 2015 234 34.5086281901073 0 52.0991890418639 0 75.9234679426731 0 NA NA NA NA NA NA
"1937" "Stortjärn" 2015 235 32.1748452283676 0 47.6669677067305 0 65.3595445138365 0 NA NA NA NA NA NA
"1938" "Stortjärn" 2015 236 31.9669511526107 0 47.328013073112 0 67.7088623155191 0 NA NA NA NA NA NA
"1939" "Stortjärn" 2015 237 33.7769390044771 0 50.3884156337124 0 71.5278887686957 0 NA NA NA NA NA NA
"1940" "Stortjärn" 2015 238 51.9615008811877 0 76.429957172686 0 110.529397604305 0 NA NA NA NA NA NA
"1941" "Stortjärn" 2015 239 57.8982495993468 0 84.9115706175884 0 117.768491341778 0 NA NA NA NA NA NA
"1942" "Stortjärn" 2015 240 73.6130435000234 0 102.49104526503 0 149.320616116294 0 NA NA NA NA NA NA
"1943" "Stortjärn" 2015 241 82.1346603902954 0 114.428480749335 0 169.763529277709 0 NA NA NA NA NA NA
"1944" "Stortjärn" 2015 242 61.2109109727844 0 93.1334948182285 0 126.107921094496 0 NA NA NA NA NA NA
"1945" "Stortjärn" 2015 243 57.5198789381229 0 88.2311173740312 0 121.332776706928 0 NA NA NA NA NA NA
"1946" "Stortjärn" 2015 244 56.4003652143337 0 85.9417768576809 0 120.091330995897 0 NA NA NA NA NA NA
"1947" "Stortjärn" 2015 245 86.373936352193 0 120.80891379113 0 183.127442529206 0 NA NA NA NA NA NA
"1948" "Stortjärn" 2015 246 62.4487557039045 0 93.4735234766131 0 127.117361401946 0 44.6421446789445 0 68.8972040198661 0 52.8590225784515 0
"1949" "Stortjärn" 2015 247 48.1322032609773 0 70.2506879329854 0 96.4103566893679 0 NA NA NA NA NA NA
"1950" "Stortjärn" 2015 248 46.9415744911026 0 70.7423160615838 0 84.6079227389537 0 NA NA NA NA NA NA
"1951" "Stortjärn" 2015 249 71.8798890790042 0 103.023120947291 0 149.503554866528 0 NA NA NA NA NA NA
"1952" "Stortjärn" 2015 250 73.5920716049586 0 105.239575535308 0 151.787951718239 0 NA NA NA NA NA NA
"1953" "Stortjärn" 2015 251 70.54725151873 0 102.155225534418 0 148.896553509403 0 NA NA NA NA NA NA
"1954" "Stortjärn" 2015 252 49.5140618620954 0 75.8826747079647 0 105.049529371986 0 NA NA NA NA NA NA
"1955" "Stortjärn" 2015 253 42.0737198538024 0 61.7349531977332 0 71.1486849944053 0 NA NA NA NA NA NA
"1956" "Stortjärn" 2015 254 38.871995795716 0 57.212644918347 0 65.0576822626241 0 NA NA NA NA NA NA
"1957" "Stortjärn" 2015 255 39.4308200960954 0 60.5271420966656 0 66.405394368263 0 NA NA NA NA NA NA
"1958" "Stortjärn" 2015 256 46.6773907393194 0 70.9467691848252 0 84.68514717885 0 NA NA NA NA NA NA
"1959" "Stortjärn" 2015 257 43.674760944331 0 67.4823934077329 0 84.518994626306 0 NA NA NA NA NA NA
"1960" "Stortjärn" 2015 258 51.5395349369955 0 75.2906963838569 0 97.3317464813986 0 NA NA NA NA NA NA
"1961" "Stortjärn" 2015 259 44.6681329162043 0 67.2754859606729 0 86.4078525576597 0 50.0518984770846 0 74.6471127952811 0 90.1355691749549 0
"1962" "Stortjärn" 2015 260 45.8443701007175 0 66.9135610722494 0 86.1863836520506 0 NA NA NA NA NA NA
"1963" "Stortjärn" 2015 261 35.7306614839155 0 55.1050222432 0 63.6514337722632 0 NA NA NA NA NA NA
"1964" "Stortjärn" 2015 262 50.6764501774995 0 74.206038546236 0 101.031888119348 0 NA NA NA NA NA NA
"1965" "Stortjärn" 2015 263 39.2046947179591 0 59.7637649908768 0 74.6634193347126 0 NA NA NA NA NA NA
"1966" "Stortjärn" 2015 264 51.2123302468764 0 76.6506644552637 0 106.036943489792 0 NA NA NA NA NA NA
"1967" "Stortjärn" 2015 265 53.8747236969253 0 78.5458631876393 0 103.463338185154 0 NA NA NA NA NA NA
"1968" "Stortjärn" 2015 266 50.2907586001431 0 74.751650793149 0 102.656039094307 0 NA NA NA NA NA NA
"1969" "Stortjärn" 2015 267 46.956602835968 0 72.7988404037329 0 91.063058510253 0 NA NA NA NA NA NA
"1970" "Stortjärn" 2015 268 64.3793482442579 0 91.1315869953301 0 131.571706453434 0 NA NA NA NA NA NA
"1971" "Stortjärn" 2015 269 59.0625913894977 0 87.2588959574988 0 129.967162710805 0 NA NA NA NA NA NA
"1972" "Stortjärn" 2015 270 71.1335498351792 0 102.887781449927 0 148.573999612642 0 NA NA NA NA NA NA
"1973" "Stortjärn" 2015 271 70.8396948499979 0 97.5634252542704 0 140.870492457354 0 NA NA NA NA NA NA
"1974" "Stortjärn" 2015 272 54.9895800102575 0 82.4715001252789 0 115.478300175408 0 39.360024105908 0 60.606810230885 0 62.377773527202 0
"1975" "Stortjärn" 2015 273 67.561002179763 0 96.7354882476506 0 139.970286679934 0 NA NA NA NA NA NA
