# Supplementary material for: Greenhouse gas emissions from boreal inland waters unchanged after forest harvesting
Source: Copernicus journal article supplement (doi:10.5194/bg-2018-217), 2018-05-15
Supplement: Supplementary file 1 [file bg-2018-217-supplement.zip › Suppl_File_S3_DATA_Fig5.txt]

"Lake" "Year" "DOY" "Flux_Logger_CO2_mmol_m-2_d-1" "Flux_Logger_CO2_mmol_m-2_d-1_SE" "Flux_Spot_CO2_mmol_m-2_d-1" "Flux_Spot_CO2_mmol_m-2_d-1_SE"
"1" "ÖvreBjörntjärn" 2012 151 176.162152739224 25.7730722323241 NA NA
"2" "ÖvreBjörntjärn" 2012 152 116.440882359866 17.786733652516 NA NA
"3" "ÖvreBjörntjärn" 2012 153 110.376115436141 19.7760624409969 NA NA
"4" "ÖvreBjörntjärn" 2012 154 141.196751786645 20.6575250482647 NA NA
"5" "ÖvreBjörntjärn" 2012 155 712.696054010944 104.269654940624 NA NA
"6" "ÖvreBjörntjärn" 2012 156 524.635860088256 76.7558621841901 442.646629943315 64.760582165523
"7" "ÖvreBjörntjärn" 2012 157 283.03403447645 41.4087617648842 NA NA
"8" "ÖvreBjörntjärn" 2012 158 297.866701299732 43.5788271704787 NA NA
"9" "ÖvreBjörntjärn" 2012 159 808.372539723911 118.267423126765 NA NA
"10" "ÖvreBjörntjärn" 2012 160 355.361930998837 51.9905585498214 NA NA
"11" "ÖvreBjörntjärn" 2012 161 278.707522032587 40.7757795039623 NA NA
"12" "ÖvreBjörntjärn" 2012 162 1152.96384178691 168.682205079659 NA NA
"13" "ÖvreBjörntjärn" 2012 163 1489.13538220016 217.865149649757 NA NA
"14" "ÖvreBjörntjärn" 2012 164 754.948566986888 110.451329335455 NA NA
"15" "ÖvreBjörntjärn" 2012 165 403.50520175675 59.0340691759706 NA NA
"16" "ÖvreBjörntjärn" 2012 166 295.282423871941 43.2007393248254 NA NA
"17" "ÖvreBjörntjärn" 2012 167 262.330089179787 38.3797100115551 NA NA
"18" "ÖvreBjörntjärn" 2012 168 197.753512615662 35.2795897441873 NA NA
"19" "ÖvreBjörntjärn" 2012 169 196.055159115994 39.0382367537709 NA NA
"20" "ÖvreBjörntjärn" 2012 170 196.569420604013 38.6933253359665 242.143628500401 60.3477304250548
"21" "ÖvreBjörntjärn" 2012 171 250.731822900685 52.2724939373681 NA NA
"22" "ÖvreBjörntjärn" 2012 172 957.952230817731 140.151398334292 NA NA
"23" "ÖvreBjörntjärn" 2012 173 455.799406395238 66.6848743717656 NA NA
"24" "ÖvreBjörntjärn" 2012 174 235.034643817639 37.8309476724079 NA NA
"25" "ÖvreBjörntjärn" 2012 175 201.584511838866 50.2394709026922 NA NA
"26" "ÖvreBjörntjärn" 2012 176 195.365584662749 48.689572013832 NA NA
"27" "ÖvreBjörntjärn" 2012 177 190.152392887685 47.3903253896527 NA NA
"28" "ÖvreBjörntjärn" 2012 178 184.497836542799 45.9810806199772 NA NA
"29" "ÖvreBjörntjärn" 2012 179 180.697427189406 45.0339316878176 NA NA
"30" "ÖvreBjörntjärn" 2012 180 173.102688059046 43.141148992993 NA NA
"31" "ÖvreBjörntjärn" 2012 181 167.005774405411 41.621658664575 NA NA
"32" "ÖvreBjörntjärn" 2012 182 201.367505338203 50.1853879194496 NA NA
"33" "ÖvreBjörntjärn" 2012 183 213.199708690639 53.1342436158368 NA NA
"34" "ÖvreBjörntjärn" 2012 184 506.174864416356 75.9941592959242 632.960010728353 92.6040231855216
"35" "ÖvreBjörntjärn" 2012 185 323.239313445438 51.114192113222 NA NA
"36" "ÖvreBjörntjärn" 2012 186 217.859711248319 54.295622834743 NA NA
"37" "ÖvreBjörntjärn" 2012 187 204.513653308306 50.9694799509145 NA NA
"38" "ÖvreBjörntjärn" 2012 188 200.733299614742 50.0273293478882 NA NA
"39" "ÖvreBjörntjärn" 2012 189 197.339744229646 49.1815777300136 NA NA
"40" "ÖvreBjörntjärn" 2012 190 525.967931615728 86.3336247466375 NA NA
"41" "ÖvreBjörntjärn" 2012 191 635.797235041247 93.0191179491724 NA NA
"42" "ÖvreBjörntjärn" 2012 192 294.564533021801 53.8012406513428 NA NA
"43" "ÖvreBjörntjärn" 2012 193 415.766323967953 63.1633167585264 NA NA
"44" "ÖvreBjörntjärn" 2012 194 1017.08151008549 148.802196260616 NA NA
"45" "ÖvreBjörntjärn" 2012 195 607.649562023219 88.901025620116 NA NA
"46" "ÖvreBjörntjärn" 2012 196 542.446021870547 79.3615443863363 NA NA
"47" "ÖvreBjörntjärn" 2012 197 558.472194073961 81.7062233504819 NA NA
"48" "ÖvreBjörntjärn" 2012 198 398.250309058478 58.2652619890708 386.70639778829 56.5763517754762
"49" "ÖvreBjörntjärn" 2012 199 256.08360189838 56.7621356257265 NA NA
"50" "ÖvreBjörntjärn" 2012 200 229.731854427778 57.2544324495105 NA NA
"51" "ÖvreBjörntjärn" 2012 201 213.673850180164 53.2524105193822 NA NA
"52" "ÖvreBjörntjärn" 2012 202 202.393802766397 50.4411647115798 NA NA
"53" "ÖvreBjörntjärn" 2012 203 177.866960968905 44.328514768488 NA NA
"54" "ÖvreBjörntjärn" 2012 204 167.45365889876 41.733281724135 NA NA
"55" "ÖvreBjörntjärn" 2012 205 180.817657670742 45.0638958736252 NA NA
"56" "ÖvreBjörntjärn" 2012 206 249.45812643465 62.1706706042552 NA NA
"57" "ÖvreBjörntjärn" 2012 207 237.743932077137 59.251225448453 NA NA
"58" "ÖvreBjörntjärn" 2012 208 219.416183355244 54.6835312827354 NA NA
"59" "ÖvreBjörntjärn" 2012 209 194.470662030993 48.4665368257209 NA NA
"60" "ÖvreBjörntjärn" 2012 210 179.656925897185 44.7746149679073 NA NA
"61" "ÖvreBjörntjärn" 2012 211 176.920125574534 44.0925417326072 NA NA
"62" "ÖvreBjörntjärn" 2012 212 193.397664202537 48.1991212257345 NA NA
"63" "ÖvreBjörntjärn" 2012 213 213.698593667991 53.258577162471 220.739778834835 55.0134015489442
"64" "ÖvreBjörntjärn" 2012 214 204.509389950395 50.9684174246133 NA NA
"65" "ÖvreBjörntjärn" 2012 215 221.222612795993 55.1337348152311 NA NA
"66" "ÖvreBjörntjärn" 2012 216 205.153079808569 51.128839659462 NA NA
"67" "ÖvreBjörntjärn" 2012 217 222.124933656262 55.3586138110967 NA NA
"68" "ÖvreBjörntjärn" 2012 218 226.52278241172 56.4546583066226 NA NA
"69" "ÖvreBjörntjärn" 2012 219 203.496596472616 50.7160061257831 NA NA
"70" "ÖvreBjörntjärn" 2012 220 200.453497638527 49.9575962959075 NA NA
"71" "ÖvreBjörntjärn" 2012 221 235.419635545181 58.6719575923998 NA NA
"72" "ÖvreBjörntjärn" 2012 222 212.901169305668 53.0598407730402 NA NA
"73" "ÖvreBjörntjärn" 2012 223 229.258040968544 57.136347298616 NA NA
"74" "ÖvreBjörntjärn" 2012 224 208.178532329007 51.8828516243769 232.874156529903 58.037566002714
"75" "ÖvreBjörntjärn" 2012 225 196.983728017885 49.0928503473963 NA NA
"76" "ÖvreBjörntjärn" 2012 226 184.028402695208 45.8640869684726 NA NA
"77" "ÖvreBjörntjärn" 2012 227 166.241094877267 41.431083036747 NA NA
"78" "ÖvreBjörntjärn" 2012 228 154.880623217502 38.5997936674136 NA NA
"79" "ÖvreBjörntjärn" 2012 229 144.558356098077 36.0272486148915 NA NA
"80" "ÖvreBjörntjärn" 2012 230 133.810201888706 33.3485627588523 NA NA
"81" "ÖvreBjörntjärn" 2012 231 126.298155644571 31.4763890225904 NA NA
"82" "ÖvreBjörntjärn" 2012 232 122.826081735136 30.6110687926091 NA NA
"83" "ÖvreBjörntjärn" 2012 233 117.940996503721 29.3935938234161 NA NA
"84" "ÖvreBjörntjärn" 2012 234 116.93254947123 29.1422657581615 NA NA
"85" "ÖvreBjörntjärn" 2012 235 196.494999154944 48.9710479367594 NA NA
"86" "ÖvreBjörntjärn" 2012 236 165.804133530051 41.3221822750327 NA NA
"87" "ÖvreBjörntjärn" 2012 237 169.459092226194 42.2330815767221 NA NA
"88" "ÖvreBjörntjärn" 2012 238 153.207504171218 38.1828141342355 NA NA
"89" "ÖvreBjörntjärn" 2012 239 152.97128914271 38.1239439465248 NA NA
"90" "ÖvreBjörntjärn" 2012 240 1575.07611805021 238.996333122153 1977.06665359181 289.251016060021
"91" "ÖvreBjörntjärn" 2012 241 2072.49773281168 303.212880511026 NA NA
"92" "ÖvreBjörntjärn" 2012 242 743.501416427349 108.776575515535 NA NA
"93" "ÖvreBjörntjärn" 2012 243 466.550058961025 68.2577283634672 NA NA
"94" "ÖvreBjörntjärn" 2012 244 624.5361436655 91.3715851679879 NA NA
"95" "ÖvreBjörntjärn" 2012 245 1365.85789655372 199.829269111396 NA NA
"96" "ÖvreBjörntjärn" 2012 246 680.072301936306 99.4966982888415 NA NA
"97" "ÖvreBjörntjärn" 2012 247 445.085975812748 65.1174660722811 NA NA
"98" "ÖvreBjörntjärn" 2012 248 298.872886397044 43.7260351875747 NA NA
"99" "ÖvreBjörntjärn" 2012 249 281.508981145427 41.1856417073268 NA NA
"100" "ÖvreBjörntjärn" 2012 250 222.408400161284 41.4470237661408 NA NA
"101" "ÖvreBjörntjärn" 2012 251 200.451207090962 49.9570254390658 NA NA
"102" "ÖvreBjörntjärn" 2012 252 189.511588286011 47.230622226714 NA NA
"103" "ÖvreBjörntjärn" 2012 253 179.114725586319 44.639486249472 NA NA
"104" "ÖvreBjörntjärn" 2012 254 175.570424024051 43.7561652364455 200.384283846884 49.9403466360027
"105" "ÖvreBjörntjärn" 2012 255 189.796390580675 47.3016014724173 NA NA
"106" "ÖvreBjörntjärn" 2012 256 199.702352506903 49.7703937492452 NA NA
"107" "ÖvreBjörntjärn" 2012 257 186.234926820961 46.4140032472612 NA NA
"108" "ÖvreBjörntjärn" 2012 258 179.842237640092 44.8207988926086 NA NA
"109" "ÖvreBjörntjärn" 2012 259 293.234235271926 46.5973568862483 NA NA
"110" "ÖvreBjörntjärn" 2012 260 246.723158057359 37.8428915550851 NA NA
"111" "ÖvreBjörntjärn" 2012 261 203.697181478427 49.020485953317 NA NA
"112" "ÖvreBjörntjärn" 2012 262 225.618536977893 33.0086954550925 NA NA
"113" "ÖvreBjörntjärn" 2012 263 207.55555275227 33.7676098721638 NA NA
"114" "ÖvreBjörntjärn" 2012 264 237.025879497556 34.677625234654 NA NA
"115" "ÖvreBjörntjärn" 2012 265 211.19569260854 30.8985883523644 NA NA
"116" "ÖvreBjörntjärn" 2012 266 184.240420480467 45.9169266497368 NA NA
"117" "ÖvreBjörntjärn" 2012 267 174.910241830662 43.5916327344559 NA NA
"118" "ÖvreBjörntjärn" 2012 268 166.179764249024 41.4157980414615 NA NA
"119" "ÖvreBjörntjärn" 2012 269 159.933330370711 39.8590438532929 179.783002680596 44.806036185906
"120" "ÖvreBjörntjärn" 2012 270 156.163469653365 38.9195083399311 NA NA
"121" "ÖvreBjörntjärn" 2012 271 1007.03605439281 154.589052637108 NA NA
"122" "ÖvreBjörntjärn" 2012 272 1080.62472667785 158.098766980511 NA NA
"123" "ÖvreBjörntjärn" 2012 273 428.742122136548 62.7263093181127 NA NA
"124" "ÖvreBjörntjärn" 2012 274 469.550048354203 68.6966361658772 NA NA
"125" "ÖvreBjörntjärn" 2013 151 112.317537407168 27.9920991992675 NA NA
"126" "ÖvreBjörntjärn" 2013 152 105.119751319927 26.1982462817239 NA NA
"127" "ÖvreBjörntjärn" 2013 153 108.370726371842 27.0084636195352 NA NA
"128" "ÖvreBjörntjärn" 2013 154 106.348397050585 26.5044528988497 NA NA
"129" "ÖvreBjörntjärn" 2013 155 102.064367436976 25.4367747366939 NA NA
"130" "ÖvreBjörntjärn" 2013 156 98.2859404030019 24.4951043013034 NA NA
"131" "ÖvreBjörntjärn" 2013 157 94.516246643697 23.5556103977042 NA NA
"132" "ÖvreBjörntjärn" 2013 158 85.3469233122864 21.2704053067793 NA NA
"133" "ÖvreBjörntjärn" 2013 159 80.7091377317345 20.1145630667102 NA NA
"134" "ÖvreBjörntjärn" 2013 160 71.9115872908089 17.9220122831205 NA NA
"135" "ÖvreBjörntjärn" 2013 161 65.0800876889719 16.2245498782906 70.2002980920706 17.4955198749397
"136" "ÖvreBjörntjärn" 2013 162 70.4416333229455 17.5556661341872 NA NA
"137" "ÖvreBjörntjärn" 2013 163 82.5007126901497 20.5610645224631 NA NA
"138" "ÖvreBjörntjärn" 2013 164 72.2086659902339 17.9960510896708 NA NA
"139" "ÖvreBjörntjärn" 2013 165 161.829339157525 40.3315726076476 NA NA
"140" "ÖvreBjörntjärn" 2013 166 155.568225029682 38.7711597655357 NA NA
"141" "ÖvreBjörntjärn" 2013 167 126.428611350098 31.5089015681333 NA NA
"142" "ÖvreBjörntjärn" 2013 168 112.573990666846 28.0560132170656 NA NA
"143" "ÖvreBjörntjärn" 2013 169 95.4808997865302 23.7960240240213 NA NA
"144" "ÖvreBjörntjärn" 2013 170 72.2824029947115 18.014428037667 NA NA
"145" "ÖvreBjörntjärn" 2013 171 98.9752909130047 24.6669062149183 NA NA
"146" "ÖvreBjörntjärn" 2013 172 114.106906646395 28.4380509393506 NA NA
"147" "ÖvreBjörntjärn" 2013 173 106.381348096704 26.5126650531844 NA NA
"148" "ÖvreBjörntjärn" 2013 174 115.232271497863 28.7185175991872 NA NA
"149" "ÖvreBjörntjärn" 2013 175 89.0963027944121 22.2048364278863 96.0107238405824 23.9280682961943
"150" "ÖvreBjörntjärn" 2013 176 71.3325690735052 17.777707700318 NA NA
"151" "ÖvreBjörntjärn" 2013 177 50.1607486960645 12.5012058296798 NA NA
"152" "ÖvreBjörntjärn" 2013 178 168.601664403896 39.5464715118991 NA NA
"153" "ÖvreBjörntjärn" 2013 179 393.348905943447 57.5481714304053 NA NA
"154" "ÖvreBjörntjärn" 2013 180 242.028728333241 50.8012127557243 NA NA
"155" "ÖvreBjörntjärn" 2013 181 197.726054111307 49.2778549880335 NA NA
"156" "ÖvreBjörntjärn" 2013 182 150.490768971555 37.5057415865048 NA NA
"157" "ÖvreBjörntjärn" 2013 183 1109.12438899384 169.36025030206 NA NA
"158" "ÖvreBjörntjärn" 2013 184 1976.95542857877 289.234743493806 NA NA
"159" "ÖvreBjörntjärn" 2013 185 634.060793326991 92.7650711120236 NA NA
"160" "ÖvreBjörntjärn" 2013 186 364.34488289528 53.3047924217771 NA NA
"161" "ÖvreBjörntjärn" 2013 187 261.183704468486 62.7758827627286 NA NA
"162" "ÖvreBjörntjärn" 2013 188 214.926081183258 53.5644951258311 NA NA
"163" "ÖvreBjörntjärn" 2013 189 167.400123191303 41.8064552624302 181.804148208244 45.309751878149
"164" "ÖvreBjörntjärn" 2013 190 130.97456211391 32.6418564714653 NA NA
"165" "ÖvreBjörntjärn" 2013 191 129.712022965528 32.4067029272893 NA NA
"166" "ÖvreBjörntjärn" 2013 192 103.951639429888 26.1015353841566 NA NA
"167" "ÖvreBjörntjärn" 2013 193 82.7587315530707 20.6253687243972 NA NA
"168" "ÖvreBjörntjärn" 2013 194 81.2948640727489 20.2605394673667 NA NA
"169" "ÖvreBjörntjärn" 2013 195 149.727987624113 37.3156390287222 NA NA
"170" "ÖvreBjörntjärn" 2013 196 110.251211863481 27.4771236136902 NA NA
"171" "ÖvreBjörntjärn" 2013 197 114.230945954758 28.4689643719672 NA NA
"172" "ÖvreBjörntjärn" 2013 198 87.3184905165314 21.7617649468966 NA NA
"173" "ÖvreBjörntjärn" 2013 199 71.822244275913 17.8997459603942 76.5467611184305 19.0772036146245
"174" "ÖvreBjörntjärn" 2013 200 61.0478522090501 15.2145210301673 NA NA
"175" "ÖvreBjörntjärn" 2013 201 61.8539780148503 15.4154260183282 NA NA
"176" "ÖvreBjörntjärn" 2013 202 68.5396369032977 17.081645124784 NA NA
"177" "ÖvreBjörntjärn" 2013 203 45.9288928621674 11.4465305667241 49.733644974375 12.394761813706
"178" "ÖvreBjörntjärn" 2013 204 33.4308759697986 8.3317389079908 34.3015120680108 8.54872133647188
"179" "ÖvreBjörntjärn" 2013 205 25.9420825874315 6.39230363787205 28.4895958761427 7.10025889386294
"180" "ÖvreBjörntjärn" 2013 206 22.4989264573111 4.75747962665717 NA NA
"181" "ÖvreBjörntjärn" 2013 207 23.6819448798927 3.50814460473133 NA NA
"182" "ÖvreBjörntjärn" 2013 208 24.4614770378569 2.65367046713675 NA NA
"183" "ÖvreBjörntjärn" 2013 209 25.6546730273804 2.69688756795416 NA NA
"184" "ÖvreBjörntjärn" 2013 210 47.3242076334872 9.9322110745545 NA NA
"185" "ÖvreBjörntjärn" 2013 211 108.745772563786 27.1019337084594 NA NA
"186" "ÖvreBjörntjärn" 2013 212 1414.27034477829 210.2603501831 NA NA
"187" "ÖvreBjörntjärn" 2013 213 808.414721483609 118.273594449735 NA NA
"188" "ÖvreBjörntjärn" 2013 214 340.61028703497 67.9338125415762 NA NA
"189" "ÖvreBjörntjärn" 2013 215 254.548251875429 63.4392462832116 NA NA
"190" "ÖvreBjörntjärn" 2013 216 193.146834669753 48.1366087693016 NA NA
"191" "ÖvreBjörntjärn" 2013 217 144.965599909349 36.1287430869621 156.236112282277 38.9376125445064
"192" "ÖvreBjörntjärn" 2013 218 102.460266855136 25.5354419265369 NA NA
"193" "ÖvreBjörntjärn" 2013 219 111.260664709691 27.728702350728 NA NA
"194" "ÖvreBjörntjärn" 2013 220 103.26297286512 25.7354946233644 NA NA
"195" "ÖvreBjörntjärn" 2013 221 71.6428454288693 17.8550356645793 NA NA
"196" "ÖvreBjörntjärn" 2013 222 91.4977717849125 22.8033374256634 NA NA
"197" "ÖvreBjörntjärn" 2013 223 141.773417838543 35.3331783047305 NA NA
"198" "ÖvreBjörntjärn" 2013 224 105.635022875715 26.3266637384913 NA NA
"199" "ÖvreBjörntjärn" 2013 225 164.579105121491 41.0168771773077 NA NA
"200" "ÖvreBjörntjärn" 2013 226 220.740422458068 55.0135619545745 NA NA
"201" "ÖvreBjörntjärn" 2013 227 181.123783149771 45.1401893445668 NA NA
"202" "ÖvreBjörntjärn" 2013 228 142.455995922448 35.5032923748658 NA NA
"203" "ÖvreBjörntjärn" 2013 229 201.418497676786 47.9538789418629 NA NA
"204" "ÖvreBjörntjärn" 2013 230 245.978970179009 50.0433160894191 NA NA
"205" "ÖvreBjörntjärn" 2013 231 224.884813883031 56.0464390863763 244.836631342346 61.0188883264464
"206" "ÖvreBjörntjärn" 2013 232 180.934624748373 45.0930467445905 NA NA
"207" "ÖvreBjörntjärn" 2013 233 140.764101505482 35.0816335898917 NA NA
"208" "ÖvreBjörntjärn" 2013 234 108.081471440641 26.9363746749682 NA NA
"209" "ÖvreBjörntjärn" 2013 235 83.8712602152188 20.9026363122716 NA NA
"210" "ÖvreBjörntjärn" 2013 236 71.8511324487274 17.9069455537772 NA NA
"211" "ÖvreBjörntjärn" 2013 237 63.2492843474168 15.7631682692376 NA NA
"212" "ÖvreBjörntjärn" 2013 238 56.5225182220211 14.0867042991476 NA NA
"213" "ÖvreBjörntjärn" 2013 239 49.7810220575481 12.4065692664206 NA NA
"214" "ÖvreBjörntjärn" 2013 240 46.4569592062576 11.5781367773729 NA NA
"215" "ÖvreBjörntjärn" 2013 241 44.0721104981942 10.983777934111 NA NA
"216" "ÖvreBjörntjärn" 2013 242 44.4106760760672 11.0681562196402 NA NA
"217" "ÖvreBjörntjärn" 2013 243 47.3121783210803 11.7912769409828 NA NA
"218" "ÖvreBjörntjärn" 2013 244 130.948750756385 32.635423690824 NA NA
"219" "ÖvreBjörntjärn" 2013 245 632.066208704312 92.4732571624639 714.798849958369 104.577300544405
"220" "ÖvreBjörntjärn" 2013 246 324.302228318908 55.9617437884219 NA NA
"221" "ÖvreBjörntjärn" 2013 247 218.79107319296 54.5277395330491 NA NA
"222" "ÖvreBjörntjärn" 2013 248 182.28487423689 45.4295597994425 NA NA
"223" "ÖvreBjörntjärn" 2013 249 164.447057788984 40.9839679619182 NA NA
"224" "ÖvreBjörntjärn" 2013 250 148.878754740481 37.1039907708393 NA NA
"225" "ÖvreBjörntjärn" 2013 251 138.507821178325 34.5193169277112 NA NA
"226" "ÖvreBjörntjärn" 2013 252 129.973928543996 32.3924756997909 NA NA
"227" "ÖvreBjörntjärn" 2013 253 125.995736859348 31.4010193445231 NA NA
"228" "ÖvreBjörntjärn" 2013 254 125.61161212431 31.3052866750194 NA NA
"229" "ÖvreBjörntjärn" 2013 255 116.237850647185 28.969130922363 NA NA
"230" "ÖvreBjörntjärn" 2013 256 109.659109691411 27.3295582101094 NA NA
"231" "ÖvreBjörntjärn" 2013 257 109.722566940778 27.3453732080181 NA NA
"232" "ÖvreBjörntjärn" 2013 258 110.522626610895 27.5447663764247 NA NA
"233" "ÖvreBjörntjärn" 2013 259 113.787617182153 28.3584767022129 118.956260809842 29.6466209091808
"234" "ÖvreBjörntjärn" 2013 260 157.461217613752 39.2429368131812 NA NA
"235" "ÖvreBjörntjärn" 2013 261 226.291464889941 56.3970086896026 NA NA
"236" "ÖvreBjörntjärn" 2013 262 722.460911588997 112.328727256553 NA NA
"237" "ÖvreBjörntjärn" 2013 263 3016.20585563149 441.280321431044 NA NA
"238" "ÖvreBjörntjärn" 2013 264 3653.80501893631 534.563067103722 NA NA
"239" "ÖvreBjörntjärn" 2013 265 1412.66577348316 206.677407456584 NA NA
"240" "ÖvreBjörntjärn" 2013 266 725.065633904921 106.079363048375 NA NA
"241" "ÖvreBjörntjärn" 2013 267 638.832791578292 93.4632293356312 NA NA
"242" "ÖvreBjörntjärn" 2013 268 427.083011487015 62.4835762568568 NA NA
"243" "ÖvreBjörntjärn" 2013 269 304.534513198322 44.5543488419713 NA NA
"244" "ÖvreBjörntjärn" 2013 270 315.630488308669 46.1777245986832 358.877700161729 52.5049265407801
"245" "ÖvreBjörntjärn" 2013 271 417.386170610984 61.064898201229 NA NA
"246" "ÖvreBjörntjärn" 2013 272 353.428906566432 51.707751048048 NA NA
"247" "ÖvreBjörntjärn" 2013 273 280.298102032428 41.0084863174848 325.871260445798 47.6759814938276
"248" "ÖvreBjörntjärn" 2013 274 231.315485440502 33.8421767786774 NA NA
"249" "ÖvreBjörntjärn" 2014 151 325.875734566175 47.6766360715892 NA NA
"250" "ÖvreBjörntjärn" 2014 152 370.500745290843 54.2054142846806 NA NA
"251" "ÖvreBjörntjärn" 2014 153 268.077217823478 39.2205328520977 NA NA
"252" "ÖvreBjörntjärn" 2014 154 190.0704526098 33.9742197286521 NA NA
"253" "ÖvreBjörntjärn" 2014 155 187.499560756898 46.7291789482488 NA NA
"254" "ÖvreBjörntjärn" 2014 156 194.820047500942 48.5536116758234 NA NA
"255" "ÖvreBjörntjärn" 2014 157 200.441738710153 49.9546657020117 NA NA
"256" "ÖvreBjörntjärn" 2014 158 486.309476951212 85.2846688553412 NA NA
"257" "ÖvreBjörntjärn" 2014 159 1190.73325374122 174.207987816385 NA NA
"258" "ÖvreBjörntjärn" 2014 160 759.765318712412 111.156035131886 NA NA
"259" "ÖvreBjörntjärn" 2014 161 1120.34068819218 163.909335987353 NA NA
"260" "ÖvreBjörntjärn" 2014 162 556.052434941507 81.3522050444164 NA NA
"261" "ÖvreBjörntjärn" 2014 163 369.80647561126 54.1038404657736 409.487849274446 59.9093491621457
"262" "ÖvreBjörntjärn" 2014 164 255.724215229048 43.0291942531973 NA NA
"263" "ÖvreBjörntjärn" 2014 165 210.539598178995 52.4712832354554 NA NA
"264" "ÖvreBjörntjärn" 2014 166 191.607652049134 47.7530092567344 NA NA
"265" "ÖvreBjörntjärn" 2014 167 172.659053360797 43.0305850795712 NA NA
"266" "ÖvreBjörntjärn" 2014 168 159.278755761853 39.6959088896224 NA NA
"267" "ÖvreBjörntjärn" 2014 169 156.584977836785 39.0245578197894 NA NA
"268" "ÖvreBjörntjärn" 2014 170 149.43198066188 37.2418673235924 NA NA
"269" "ÖvreBjörntjärn" 2014 171 143.596440748689 35.7875173093185 NA NA
"270" "ÖvreBjörntjärn" 2014 172 138.062571999011 34.4083506486824 NA NA
"271" "ÖvreBjörntjärn" 2014 173 140.511419507453 35.0186594567512 NA NA
"272" "ÖvreBjörntjärn" 2014 174 143.936080356032 35.8721632675563 NA NA
"273" "ÖvreBjörntjärn" 2014 175 139.010400105842 34.644571091213 NA NA
"274" "ÖvreBjörntjärn" 2014 176 130.885168438738 32.6195775230396 NA NA
"275" "ÖvreBjörntjärn" 2014 177 123.816920131097 30.8580083829035 133.324304638307 33.2274660508243
"276" "ÖvreBjörntjärn" 2014 178 116.742267858503 29.0948432282323 NA NA
"277" "ÖvreBjörntjärn" 2014 179 113.629524292737 28.3190763383394 NA NA
"278" "ÖvreBjörntjärn" 2014 180 110.945997884171 27.650280180887 NA NA
"279" "ÖvreBjörntjärn" 2014 181 116.095411617451 28.9336318583503 NA NA
"280" "ÖvreBjörntjärn" 2014 182 130.097284455056 32.4232188141693 124.653192624937 31.0664266152255
"281" "ÖvreBjörntjärn" 2014 183 123.596899686436 30.803174255883 NA NA
"282" "ÖvreBjörntjärn" 2014 184 147.20108481292 36.6858770539613 NA NA
"283" "ÖvreBjörntjärn" 2014 185 135.915640957128 33.873286329381 NA NA
"284" "ÖvreBjörntjärn" 2014 186 121.506173785356 30.282117543169 NA NA
"285" "ÖvreBjörntjärn" 2014 187 115.604569199819 28.8113027015441 NA NA
"286" "ÖvreBjörntjärn" 2014 188 110.98074968432 27.658941124312 NA NA
"287" "ÖvreBjörntjärn" 2014 189 104.376865037006 26.0131020290511 NA NA
"288" "ÖvreBjörntjärn" 2014 190 103.369177101734 25.7619631481854 NA NA
"289" "ÖvreBjörntjärn" 2014 191 98.5718600995944 24.566362029124 103.163703152467 25.7107543405183
"290" "ÖvreBjörntjärn" 2014 192 97.7567996424868 24.3632303215079 NA NA
"291" "ÖvreBjörntjärn" 2014 193 93.5787592712529 23.3219671026915 NA NA
"292" "ÖvreBjörntjärn" 2014 194 87.9229285605683 21.9124047319122 NA NA
"293" "ÖvreBjörntjärn" 2014 195 138.14828629671 34.4297126120887 NA NA
"294" "ÖvreBjörntjärn" 2014 196 198.660640432295 49.5107752746717 NA NA
"295" "ÖvreBjörntjärn" 2014 197 187.129227178249 46.6368833503425 178.266429203017 44.4280713888908
"296" "ÖvreBjörntjärn" 2014 198 167.10514170236 41.6464232676598 NA NA
"297" "ÖvreBjörntjärn" 2014 199 159.779308487812 39.8206580773535 NA NA
"298" "ÖvreBjörntjärn" 2014 200 190.528935735701 47.4841684795009 NA NA
"299" "ÖvreBjörntjärn" 2014 201 155.129488602662 38.6618166133353 NA NA
"300" "ÖvreBjörntjärn" 2014 202 132.809114084924 33.0990687817093 NA NA
"301" "ÖvreBjörntjärn" 2014 203 105.249584961367 26.2306037946689 NA NA
"302" "ÖvreBjörntjärn" 2014 204 86.2623934199032 21.4985613958277 NA NA
"303" "ÖvreBjörntjärn" 2014 205 71.0267193216068 17.7014829468837 NA NA
"304" "ÖvreBjörntjärn" 2014 206 71.7079989667777 17.8712734163891 71.2485875887298 17.7567775935243
"305" "ÖvreBjörntjärn" 2014 207 75.5714418703649 18.8341317509329 NA NA
"306" "ÖvreBjörntjärn" 2014 208 78.5850950679361 19.5852030547204 NA NA
"307" "ÖvreBjörntjärn" 2014 209 214.664473975834 53.4992966263758 NA NA
"308" "ÖvreBjörntjärn" 2014 210 209.563065390687 52.2279089297798 NA NA
"309" "ÖvreBjörntjärn" 2014 211 153.93805706502 38.3648846242559 NA NA
"310" "ÖvreBjörntjärn" 2014 212 149.567617446164 37.275671112461 NA NA
"311" "ÖvreBjörntjärn" 2014 213 136.789146888291 34.0909839858709 NA NA
"312" "ÖvreBjörntjärn" 2014 214 222.597915818904 55.4764917838675 NA NA
"313" "ÖvreBjörntjärn" 2014 215 157.549568735826 39.2649559335301 NA NA
"314" "ÖvreBjörntjärn" 2014 216 141.828109785869 35.3468087888942 NA NA
"315" "ÖvreBjörntjärn" 2014 217 133.089464367513 33.1689384841788 NA NA
"316" "ÖvreBjörntjärn" 2014 218 125.461950575793 31.2679875941356 NA NA
"317" "ÖvreBjörntjärn" 2014 219 122.578845178808 30.5494517880862 113.67153835776 28.3295472042705
"318" "ÖvreBjörntjärn" 2014 220 140.264853892891 34.9572096662619 NA NA
"319" "ÖvreBjörntjärn" 2014 221 140.931863416398 35.1234436950688 NA NA
"320" "ÖvreBjörntjärn" 2014 222 164.736858010129 41.0561928052109 NA NA
"321" "ÖvreBjörntjärn" 2014 223 188.586466178694 47.000060638584 NA NA
"322" "ÖvreBjörntjärn" 2014 224 176.901021881418 44.0877806553515 NA NA
"323" "ÖvreBjörntjärn" 2014 225 157.900438492937 39.3524007019412 157.218671087404 39.1824886713976
"324" "ÖvreBjörntjärn" 2014 226 129.319871158447 32.2294696399987 NA NA
"325" "ÖvreBjörntjärn" 2014 227 125.50155366228 31.2778575890727 NA NA
"326" "ÖvreBjörntjärn" 2014 228 117.999245470994 29.4081107983052 NA NA
"327" "ÖvreBjörntjärn" 2014 229 113.957323005237 28.4007712747627 NA NA
"328" "ÖvreBjörntjärn" 2014 230 216.875317820891 54.0502894780139 NA NA
"329" "ÖvreBjörntjärn" 2014 231 278.30035476707 69.3588135714771 NA NA
"330" "ÖvreBjörntjärn" 2014 232 223.769975403601 55.7685958392062 NA NA
"331" "ÖvreBjörntjärn" 2014 233 209.275223026615 52.1561720292488 206.378485987362 51.4342389061694
"332" "ÖvreBjörntjärn" 2014 234 3035.77170557168 448.074539209153 NA NA
"333" "ÖvreBjörntjärn" 2014 235 2748.38260556316 402.096944853414 NA NA
"334" "ÖvreBjörntjärn" 2014 236 1431.34307875632 209.409955455262 NA NA
"335" "ÖvreBjörntjärn" 2014 237 2433.19763276203 355.984400562634 NA NA
"336" "ÖvreBjörntjärn" 2014 238 1122.41727613152 164.213147277832 NA NA
"337" "ÖvreBjörntjärn" 2014 239 652.877804346544 95.5180584970112 679.964859880772 99.4809791811043
"338" "ÖvreBjörntjärn" 2014 240 426.949793326644 62.4640860246105 NA NA
"339" "ÖvreBjörntjärn" 2014 241 330.119359514524 48.2974916334681 NA NA
"340" "ÖvreBjörntjärn" 2014 242 287.757240258319 69.324615671981 NA NA
"341" "ÖvreBjörntjärn" 2014 243 259.816353035102 64.7521775818989 NA NA
"342" "ÖvreBjörntjärn" 2014 244 237.048530952694 59.0779155833324 NA NA
"343" "ÖvreBjörntjärn" 2014 245 222.964139520464 55.5677631064039 NA NA
"344" "ÖvreBjörntjärn" 2014 246 220.475298408738 54.9474869776806 NA NA
"345" "ÖvreBjörntjärn" 2014 247 217.633214652341 54.2391747026945 226.075409012201 56.3431626233345
"346" "ÖvreBjörntjärn" 2014 248 211.90730133657 52.8121461438292 NA NA
"347" "ÖvreBjörntjärn" 2014 249 202.524084090631 50.4736337973161 NA NA
"348" "ÖvreBjörntjärn" 2014 250 194.362026019821 48.4394622470618 NA NA
"349" "ÖvreBjörntjärn" 2014 251 197.147749258294 49.1337281919279 NA NA
"350" "ÖvreBjörntjärn" 2014 252 200.507922928485 49.9711603229565 204.903781430889 51.0667088019011
"351" "ÖvreBjörntjärn" 2014 253 198.71530120196 49.5243979886493 NA NA
"352" "ÖvreBjörntjärn" 2014 254 182.537413499992 45.4924983597745 NA NA
"353" "ÖvreBjörntjärn" 2014 255 178.66046547843 44.5262742409483 NA NA
"354" "ÖvreBjörntjärn" 2014 256 170.618065323551 42.5219241801073 NA NA
"355" "ÖvreBjörntjärn" 2014 257 165.001220364514 41.1220779503034 NA NA
"356" "ÖvreBjörntjärn" 2014 258 160.385720584136 39.9717898413489 NA NA
"357" "ÖvreBjörntjärn" 2014 259 154.36616048484 38.4715777878686 NA NA
"358" "ÖvreBjörntjärn" 2014 260 162.473859496818 40.4922018173855 165.390719078266 41.2191499382139
"359" "ÖvreBjörntjärn" 2014 261 167.494786509984 41.7435316655046 NA NA
"360" "ÖvreBjörntjärn" 2014 262 163.141712451161 40.6586460484472 NA NA
"361" "ÖvreBjörntjärn" 2014 263 164.775847512757 41.0659098810168 NA NA
"362" "ÖvreBjörntjärn" 2014 264 194.241915936871 48.4095280672855 NA NA
"363" "ÖvreBjörntjärn" 2014 265 279.742332222553 52.9143374147345 NA NA
"364" "ÖvreBjörntjärn" 2014 266 202.057706357338 50.3574017993927 NA NA
"365" "ÖvreBjörntjärn" 2014 267 172.874838037147 43.0843635562501 NA NA
"366" "ÖvreBjörntjärn" 2014 268 158.160247599263 39.4171510734773 NA NA
"367" "ÖvreBjörntjärn" 2014 269 163.106432009353 40.64985335543 NA NA
"368" "ÖvreBjörntjärn" 2014 270 187.312450972461 46.6825469104743 NA NA
"369" "ÖvreBjörntjärn" 2014 271 185.502017427791 46.2313454637014 NA NA
"370" "ÖvreBjörntjärn" 2014 272 184.872178736816 46.0743752565164 NA NA
"371" "ÖvreBjörntjärn" 2014 273 172.155416447565 42.9050672418314 NA NA
"372" "ÖvreBjörntjärn" 2014 274 163.502875386295 40.7486561122428 NA NA
"373" "ÖvreBjörntjärn" 2015 151 292.937785256033 42.857711384562 NA NA
"374" "ÖvreBjörntjärn" 2015 152 371.759824913842 54.3896215594284 NA NA
"375" "ÖvreBjörntjärn" 2015 153 491.71983676211 71.9401453369882 NA NA
"376" "ÖvreBjörntjärn" 2015 154 361.511299782672 52.8902303770815 NA NA
"377" "ÖvreBjörntjärn" 2015 155 319.940503298826 46.8082932306877 NA NA
"378" "ÖvreBjörntjärn" 2015 156 251.066483207136 36.7318093370026 NA NA
"379" "ÖvreBjörntjärn" 2015 157 223.719948888269 32.7309260976429 NA NA
"380" "ÖvreBjörntjärn" 2015 158 301.521309406631 44.1135077318553 NA NA
"381" "ÖvreBjörntjärn" 2015 159 309.879881175164 45.3363928442347 NA NA
"382" "ÖvreBjörntjärn" 2015 160 227.821688713791 33.3310234236439 NA NA
"383" "ÖvreBjörntjärn" 2015 161 183.30485716888 28.3029907084126 223.157488415155 32.6486363766331
"384" "ÖvreBjörntjärn" 2015 162 172.613898593429 43.019331478783 NA NA
"385" "ÖvreBjörntjärn" 2015 163 168.303543644036 41.9450924408485 NA NA
"386" "ÖvreBjörntjärn" 2015 164 181.946508148998 45.3452312313789 NA NA
"387" "ÖvreBjörntjärn" 2015 165 170.662492683754 42.5329964943929 NA NA
"388" "ÖvreBjörntjärn" 2015 166 169.055770765722 42.1325646441812 NA NA
"389" "ÖvreBjörntjärn" 2015 167 160.652828273176 40.0383591866272 NA NA
"390" "ÖvreBjörntjärn" 2015 168 152.188015036619 37.9287341245854 NA NA
"391" "ÖvreBjörntjärn" 2015 169 143.450049719003 35.7510333165294 NA NA
"392" "ÖvreBjörntjärn" 2015 170 139.61372977587 34.7949346440752 NA NA
"393" "ÖvreBjörntjärn" 2015 171 136.941379738481 34.1289238939413 NA NA
"394" "ÖvreBjörntjärn" 2015 172 132.693843823634 33.0703407961849 NA NA
"395" "ÖvreBjörntjärn" 2015 173 127.242247410413 31.7116782834905 NA NA
"396" "ÖvreBjörntjärn" 2015 174 128.360187927142 31.9902946293042 NA NA
"397" "ÖvreBjörntjärn" 2015 175 121.996841209117 30.4044030875 119.761022414546 29.8471859072272
"398" "ÖvreBjörntjärn" 2015 176 418.667795963253 66.9515493372788 NA NA
"399" "ÖvreBjörntjärn" 2015 177 401.313139143652 58.7133635806615 NA NA
"400" "ÖvreBjörntjärn" 2015 178 247.112638411916 39.6349087586767 NA NA
"401" "ÖvreBjörntjärn" 2015 179 200.185081652705 49.8907008931481 NA NA
"402" "ÖvreBjörntjärn" 2015 180 173.850581222719 43.3275410748642 NA NA
"403" "ÖvreBjörntjärn" 2015 181 158.978189318514 39.6210008575186 NA NA
"404" "ÖvreBjörntjärn" 2015 182 137.410050342137 34.2457273276005 NA NA
"405" "ÖvreBjörntjärn" 2015 183 117.587349956993 29.3054570155229 NA NA
"406" "ÖvreBjörntjärn" 2015 184 112.396873463288 28.0118715589922 NA NA
"407" "ÖvreBjörntjärn" 2015 185 105.164070623296 26.2092916657751 NA NA
"408" "ÖvreBjörntjärn" 2015 186 97.7539376415713 24.3625170454213 NA NA
"409" "ÖvreBjörntjärn" 2015 187 87.8564054119656 21.8958256417921 NA NA
"410" "ÖvreBjörntjärn" 2015 188 208.907668636295 49.7030149956244 312.789934114321 77.9544055753281
"411" "ÖvreBjörntjärn" 2015 189 254.84544826219 44.62536280025 NA NA
"412" "ÖvreBjörntjärn" 2015 190 274.212184168463 58.1672139883321 NA NA
"413" "ÖvreBjörntjärn" 2015 191 1595.60361833884 233.441784572652 NA NA
"414" "ÖvreBjörntjärn" 2015 192 1378.48525186633 201.676690566655 NA NA
"415" "ÖvreBjörntjärn" 2015 193 623.511507929405 91.2216777649074 NA NA
"416" "ÖvreBjörntjärn" 2015 194 378.043542793958 55.3089490783849 NA NA
"417" "ÖvreBjörntjärn" 2015 195 262.886794822246 56.3695470776252 NA NA
"418" "ÖvreBjörntjärn" 2015 196 257.723035379901 64.2304749447803 NA NA
"419" "ÖvreBjörntjärn" 2015 197 251.455494728442 57.2419321973464 NA NA
"420" "ÖvreBjörntjärn" 2015 198 374.995953305894 54.8630772336725 NA NA
"421" "ÖvreBjörntjärn" 2015 199 258.241126066333 59.9344357658943 NA NA
"422" "ÖvreBjörntjärn" 2015 200 246.519909778057 46.048841242475 NA NA
"423" "ÖvreBjörntjärn" 2015 201 222.509628750944 55.4544886272687 NA NA
"424" "ÖvreBjörntjärn" 2015 202 192.521463147003 47.9807518826095 NA NA
"425" "ÖvreBjörntjärn" 2015 203 175.415487089749 43.717551408768 NA NA
"426" "ÖvreBjörntjärn" 2015 204 172.179186973492 42.9109914005614 158.00740424063 39.3790590127399
"427" "ÖvreBjörntjärn" 2015 205 241.220514445155 60.1176692894285 NA NA
"428" "ÖvreBjörntjärn" 2015 206 240.032235282939 59.8215229444049 NA NA
"429" "ÖvreBjörntjärn" 2015 207 284.710605308371 61.4839830172331 NA NA
"430" "ÖvreBjörntjärn" 2015 208 1775.36779764988 259.741844523817 NA NA
"431" "ÖvreBjörntjärn" 2015 209 1709.15319132135 250.054441155931 NA NA
"432" "ÖvreBjörntjärn" 2015 210 761.108549066347 111.352553920958 NA NA
"433" "ÖvreBjörntjärn" 2015 211 532.784174695045 77.9479860182089 NA NA
"434" "ÖvreBjörntjärn" 2015 212 505.650641206546 73.9782654644843 NA NA
"435" "ÖvreBjörntjärn" 2015 213 746.120735930319 109.159790126051 NA NA
"436" "ÖvreBjörntjärn" 2015 214 1060.69532314211 155.183033101884 NA NA
"437" "ÖvreBjörntjärn" 2015 215 2074.14077331916 303.453262460392 NA NA
"438" "ÖvreBjörntjärn" 2015 216 942.450012910033 137.883375517338 947.161250319609 138.572644240344
"439" "ÖvreBjörntjärn" 2015 217 550.271274684643 80.5064032727534 NA NA
"440" "ÖvreBjörntjärn" 2015 218 480.058324327221 70.2340297063086 NA NA
"441" "ÖvreBjörntjärn" 2015 219 378.043224641198 55.308902531644 NA NA
"442" "ÖvreBjörntjärn" 2015 220 295.94616717902 63.4803795664041 NA NA
"443" "ÖvreBjörntjärn" 2015 221 271.294081790807 67.612690101393 NA NA
"444" "ÖvreBjörntjärn" 2015 222 252.076675042459 62.8232728076152 NA NA
"445" "ÖvreBjörntjärn" 2015 223 248.425578702423 61.9133360934059 NA NA
"446" "ÖvreBjörntjärn" 2015 224 243.121254624777 60.591377215085 NA NA
"447" "ÖvreBjörntjärn" 2015 225 212.482501564959 52.9554991964707 NA NA
"448" "ÖvreBjörntjärn" 2015 226 195.183792780367 48.6442653188782 NA NA
"449" "ÖvreBjörntjärn" 2015 227 187.514156713681 46.7328165945116 NA NA
"450" "ÖvreBjörntjärn" 2015 228 178.326125065009 44.4429489630368 NA NA
"451" "ÖvreBjörntjärn" 2015 229 163.410078761027 40.7255290708224 NA NA
"452" "ÖvreBjörntjärn" 2015 230 149.8292361115 37.3408724674901 NA NA
"453" "ÖvreBjörntjärn" 2015 231 138.76083464325 34.5823736699834 127.047651491569 31.6631805298022
"454" "ÖvreBjörntjärn" 2015 232 128.164333780192 31.9414832963942 NA NA
"455" "ÖvreBjörntjärn" 2015 233 119.232329044468 29.715423427361 NA NA
"456" "ÖvreBjörntjärn" 2015 234 110.393774453062 27.5126534716428 NA NA
"457" "ÖvreBjörntjärn" 2015 235 105.980088303079 26.4126619351752 NA NA
"458" "ÖvreBjörntjärn" 2015 236 100.318136894298 25.0015741464404 NA NA
"459" "ÖvreBjörntjärn" 2015 237 97.5609811798243 24.3144278819386 NA NA
"460" "ÖvreBjörntjärn" 2015 238 97.8134075247381 24.3773383004756 NA NA
"461" "ÖvreBjörntjärn" 2015 239 111.187330434721 27.7104257721361 NA NA
"462" "ÖvreBjörntjärn" 2015 240 336.288041296305 57.9361752197991 NA NA
"463" "ÖvreBjörntjärn" 2015 241 253.850241715425 63.2652861867566 NA NA
"464" "ÖvreBjörntjärn" 2015 242 201.234664861397 50.1522810343605 NA NA
"465" "ÖvreBjörntjärn" 2015 243 170.189542871634 42.4151265841122 NA NA
"466" "ÖvreBjörntjärn" 2015 244 148.176591950162 36.928995743933 135.73584262388 33.8284764724671
"467" "ÖvreBjörntjärn" 2015 245 131.672907118518 32.8159000188539 NA NA
"468" "ÖvreBjörntjärn" 2015 246 119.462413769452 29.7727658032238 NA NA
"469" "ÖvreBjörntjärn" 2015 247 113.328100116084 28.2439545394761 NA NA
"470" "ÖvreBjörntjärn" 2015 248 106.972376687166 26.659962895674 NA NA
"471" "ÖvreBjörntjärn" 2015 249 100.040622964408 24.9324113279349 NA NA
"472" "ÖvreBjörntjärn" 2015 250 92.0852802375284 22.9497579692906 NA NA
"473" "ÖvreBjörntjärn" 2015 251 84.1657722677551 20.976035451714 NA NA
"474" "ÖvreBjörntjärn" 2015 252 83.2077240668446 20.7372679279892 NA NA
"475" "ÖvreBjörntjärn" 2015 253 78.8794891534931 19.6585727940934 NA NA
"476" "ÖvreBjörntjärn" 2015 254 77.2794872694566 19.259815730051 NA NA
"477" "ÖvreBjörntjärn" 2015 255 81.2045408308369 20.2380288496487 NA NA
"478" "ÖvreBjörntjärn" 2015 256 90.9636694549322 22.6702269092783 NA NA
"479" "ÖvreBjörntjärn" 2015 257 108.167532513031 26.9578230625588 93.0649271603488 23.1939083885118
"480" "ÖvreBjörntjärn" 2015 258 106.95156057652 26.6547750448041 NA NA
"481" "ÖvreBjörntjärn" 2015 259 113.033792478514 28.1706063449184 NA NA
"482" "ÖvreBjörntjärn" 2015 260 180.318709880359 41.3268475405479 NA NA
"483" "ÖvreBjörntjärn" 2015 261 814.75750347169 119.201563231853 NA NA
"484" "ÖvreBjörntjärn" 2015 262 1278.00884617241 186.976679120797 NA NA
"485" "ÖvreBjörntjärn" 2015 263 643.490378986772 94.1446488961926 NA NA
"486" "ÖvreBjörntjärn" 2015 264 584.587018723672 85.5269036246826 NA NA
"487" "ÖvreBjörntjärn" 2015 265 501.632324823297 73.3903732482081 NA NA
"488" "ÖvreBjörntjärn" 2015 266 436.230819300158 63.8219290634585 NA NA
"489" "ÖvreBjörntjärn" 2015 267 464.594454349427 67.9716173110712 NA NA
"490" "ÖvreBjörntjärn" 2015 268 537.406746510952 78.6242826883955 NA NA
"491" "ÖvreBjörntjärn" 2015 269 540.654981484867 79.0995095933155 NA NA
"492" "ÖvreBjörntjärn" 2015 270 373.931844149414 54.7073947461086 NA NA
"493" "ÖvreBjörntjärn" 2015 271 269.35030887114 43.5074680179619 238.049252175814 34.8273478484344
"494" "ÖvreBjörntjärn" 2015 272 232.324782638781 57.9006494640079 NA NA
"495" "ÖvreBjörntjärn" 2015 273 219.483309016242 54.7002605327247 NA NA
"496" "ÖvreBjörntjärn" 2015 274 214.056154628253 53.3476895317457 NA NA
"497" "Lillsjöliden" 2012 163 113.18660711406 31.3983196754052 147.343665872659 41.5771315716448
"498" "Lillsjöliden" 2012 164 107.611811148794 29.7956492380867 NA NA
"499" "Lillsjöliden" 2012 165 93.8649355258367 26.6286037176117 NA NA
"500" "Lillsjöliden" 2012 166 88.2284804784519 25.8015899044304 NA NA
"501" "Lillsjöliden" 2012 167 82.4129656162756 24.7119447718859 NA NA
"502" "Lillsjöliden" 2012 168 71.749908137195 23.337586525813 NA NA
"503" "Lillsjöliden" 2012 169 74.3416202560499 24.0789231241333 NA NA
"504" "Lillsjöliden" 2012 170 69.0089660844139 23.3730090530484 NA NA
"505" "Lillsjöliden" 2012 171 78.5600734333847 25.9072370634748 NA NA
"506" "Lillsjöliden" 2012 172 102.176467049929 28.5093197510752 NA NA
"507" "Lillsjöliden" 2012 173 80.2922827287306 24.7984394711419 NA NA
"508" "Lillsjöliden" 2012 174 64.8809179306233 23.3723459584485 NA NA
"509" "Lillsjöliden" 2012 175 56.1721116829276 23.0031443191654 NA NA
"510" "Lillsjöliden" 2012 176 49.9661489991656 23.1090450290965 NA NA
"511" "Lillsjöliden" 2012 177 53.3577120582991 23.1977406184667 49.5105136262595 22.1339047625301
"512" "Lillsjöliden" 2012 178 60.7076237149356 23.8993199584409 NA NA
"513" "Lillsjöliden" 2012 179 59.5531711335288 22.9152246324135 NA NA
"514" "Lillsjöliden" 2012 180 66.5650374085749 23.5796634869763 NA NA
"515" "Lillsjöliden" 2012 181 67.7842168261317 22.7931631667195 NA NA
"516" "Lillsjöliden" 2012 182 90.5854806756692 26.8525779279451 NA NA
"517" "Lillsjöliden" 2012 183 101.933475796555 28.6110360438679 NA NA
"518" "Lillsjöliden" 2012 184 105.195339533662 29.4799765325591 NA NA
"519" "Lillsjöliden" 2012 185 90.7493770853034 27.9218977107385 NA NA
"520" "Lillsjöliden" 2012 186 73.2354848207189 26.1950378285972 NA NA
"521" "Lillsjöliden" 2012 187 64.9433701538176 25.7102300944593 NA NA
"522" "Lillsjöliden" 2012 188 56.9127047244215 26.0072949851812 NA NA
"523" "Lillsjöliden" 2012 189 52.3600745931698 26.5931820512958 NA NA
"524" "Lillsjöliden" 2012 190 91.083303458393 32.0594106032734 NA NA
"525" "Lillsjöliden" 2012 191 126.420420848248 35.6100923464269 109.385365950459 30.1803100788384
"526" "Lillsjöliden" 2012 192 94.4787723834927 29.4087963265663 NA NA
"527" "Lillsjöliden" 2012 193 98.2116015054332 29.6241687776585 NA NA
"528" "Lillsjöliden" 2012 194 98.7848343803549 30.4029623810502 NA NA
"529" "Lillsjöliden" 2012 195 110.083005169091 32.5710269407732 NA NA
"530" "Lillsjöliden" 2012 196 134.891996335791 37.4598330925606 NA NA
"531" "Lillsjöliden" 2012 197 122.872725236658 34.7783247679487 NA NA
"532" "Lillsjöliden" 2012 198 103.185142572426 31.2731852054765 NA NA
"533" "Lillsjöliden" 2012 199 80.108954580355 27.8368471155371 NA NA
"534" "Lillsjöliden" 2012 200 71.3131879190496 27.01653126742 NA NA
"535" "Lillsjöliden" 2012 201 65.7259602903749 26.5846293827624 NA NA
"536" "Lillsjöliden" 2012 202 61.6474322925534 25.8573497114607 NA NA
"537" "Lillsjöliden" 2012 203 50.3646501810778 24.9431822540313 NA NA
"538" "Lillsjöliden" 2012 204 48.4247816757167 24.8241479002537 NA NA
"539" "Lillsjöliden" 2012 205 53.930630264632 25.6894146293698 53.333568235723 25.67448108514
"540" "Lillsjöliden" 2012 206 70.3248726378363 26.184777692771 NA NA
"541" "Lillsjöliden" 2012 207 69.1078971810295 26.0284117290011 NA NA
"542" "Lillsjöliden" 2012 208 57.0445033322297 25.8344627010391 NA NA
"543" "Lillsjöliden" 2012 209 43.5445592768128 26.0672093427486 NA NA
"544" "Lillsjöliden" 2012 210 39.0463259951089 26.8125650242512 NA NA
"545" "Lillsjöliden" 2012 211 35.3621513529811 28.263896049004 NA NA
"546" "Lillsjöliden" 2012 212 44.9660969924364 28.4325692473229 NA NA
"547" "Lillsjöliden" 2012 213 65.2469663344765 26.970290751893 NA NA
"548" "Lillsjöliden" 2012 214 54.8954161488264 26.6177380551668 NA NA
"549" "Lillsjöliden" 2012 215 41.3758878051527 26.555143067269 NA NA
"550" "Lillsjöliden" 2012 216 38.1982334366437 28.2084466547129 NA NA
"551" "Lillsjöliden" 2012 217 96.4338540914557 34.263513402088 NA NA
"552" "Lillsjöliden" 2012 218 125.671009002656 35.574947485864 NA NA
"553" "Lillsjöliden" 2012 219 86.0563485447507 29.7731806436694 91.4257319665147 30.2072593035272
"554" "Lillsjöliden" 2012 220 74.6434315140044 29.3216238191501 NA NA
"555" "Lillsjöliden" 2012 221 70.7187897289512 27.2097688059955 NA NA
"556" "Lillsjöliden" 2012 222 60.7273693343936 27.9738142650425 NA NA
"557" "Lillsjöliden" 2012 223 84.1512680928035 27.2025903524555 NA NA
"558" "Lillsjöliden" 2012 224 74.0345375697777 28.835178166504 NA NA
"559" "Lillsjöliden" 2012 225 69.686265422561 31.0218867436296 NA NA
"560" "Lillsjöliden" 2012 226 50.5304583357799 30.2340883481368 NA NA
"561" "Lillsjöliden" 2012 227 38.0449076756871 29.5045516609379 NA NA
"562" "Lillsjöliden" 2012 228 28.3871855006745 29.9297499112642 NA NA
"563" "Lillsjöliden" 2012 229 15.3095332983274 30.9071136120719 NA NA
"564" "Lillsjöliden" 2012 230 10.8343611547382 30.6128363936715 NA NA
"565" "Lillsjöliden" 2012 231 11.0544027680696 31.0972569771965 NA NA
"566" "Lillsjöliden" 2012 232 10.7977043766588 30.3075338771139 NA NA
"567" "Lillsjöliden" 2012 233 10.425605508577 29.196428587858 10.5403965702219 29.5755082485702
"568" "Lillsjöliden" 2012 234 12.6805721152535 29.757835042568 NA NA
"569" "Lillsjöliden" 2012 235 31.401132695172 26.5651867136637 NA NA
"570" "Lillsjöliden" 2012 236 11.4456827783039 27.1882942833781 NA NA
"571" "Lillsjöliden" 2012 237 10.0108791886668 28.2315091825178 NA NA
"572" "Lillsjöliden" 2012 238 9.85143311167021 27.6722078375609 NA NA
"573" "Lillsjöliden" 2012 239 9.92861529789905 27.8242665975774 NA NA
"574" "Lillsjöliden" 2012 240 187.338225400121 77.7836549039195 NA NA
"575" "Lillsjöliden" 2012 241 161.334886878154 45.7001532860985 NA NA
"576" "Lillsjöliden" 2012 242 125.243441241276 36.4074669073002 NA NA
"577" "Lillsjöliden" 2012 243 117.390850128607 35.5943540933932 NA NA
"578" "Lillsjöliden" 2012 244 174.792429079666 60.4168546080923 NA NA
"579" "Lillsjöliden" 2012 245 225.940664894957 73.8070661851838 NA NA
"580" "Lillsjöliden" 2012 246 181.267363993127 51.8059478376369 NA NA
"581" "Lillsjöliden" 2012 247 156.919201084663 43.5711908670472 NA NA
"582" "Lillsjöliden" 2012 248 139.183795123589 38.4781199110082 133.164357407593 36.953951619522
"583" "Lillsjöliden" 2012 249 134.412439669706 37.171597685607 NA NA
"584" "Lillsjöliden" 2012 250 121.147201514102 34.4584078290587 NA NA
"585" "Lillsjöliden" 2012 251 108.035251223848 31.8054769543463 NA NA
"586" "Lillsjöliden" 2012 252 107.295519647017 30.9956596132011 NA NA
"587" "Lillsjöliden" 2012 253 98.8220429912923 30.1176432361981 NA NA
"588" "Lillsjöliden" 2012 254 100.501247017609 31.1668026459719 NA NA
"589" "Lillsjöliden" 2012 255 105.132204421987 32.2134240021998 NA NA
"590" "Lillsjöliden" 2012 256 103.994950496209 32.220834247836 NA NA
"591" "Lillsjöliden" 2012 257 92.7231027487374 30.5518033673366 NA NA
"592" "Lillsjöliden" 2012 258 95.4196617405416 30.3957789506033 NA NA
"593" "Lillsjöliden" 2012 259 115.58948971801 32.0892539496829 104.976606089582 28.9646676148273
"594" "Lillsjöliden" 2012 260 118.518597661225 33.7933288500328 NA NA
"595" "Lillsjöliden" 2012 261 115.018032777597 33.5331710795525 NA NA
"596" "Lillsjöliden" 2012 262 124.694560520824 34.4718702229152 NA NA
"597" "Lillsjöliden" 2012 263 128.262038120119 36.025015535408 NA NA
"598" "Lillsjöliden" 2012 264 120.94343832399 34.3098293185546 NA NA
"599" "Lillsjöliden" 2012 265 117.460570758193 33.5851269423008 NA NA
"600" "Lillsjöliden" 2012 266 116.095569207857 33.3082872525811 NA NA
"601" "Lillsjöliden" 2012 267 115.628724064725 33.3894754802328 NA NA
"602" "Lillsjöliden" 2012 268 109.858637700906 32.1685164872327 NA NA
"603" "Lillsjöliden" 2012 269 108.702387089727 31.8690202850478 NA NA
"604" "Lillsjöliden" 2012 270 106.125307618452 31.1135011467681 NA NA
"605" "Lillsjöliden" 2012 271 171.16930013557 69.5763891790476 NA NA
"606" "Lillsjöliden" 2012 272 182.661469332449 57.3523606045099 NA NA
"607" "Lillsjöliden" 2012 273 155.504866989984 44.5280947025292 NA NA
"608" "Lillsjöliden" 2012 274 167.772381879192 50.6326237468385 NA NA
"609" "Lillsjöliden" 2013 151 15.2704661592106 22.7492294700866 NA NA
"610" "Lillsjöliden" 2013 152 11.5058578342365 23.1478567669026 NA NA
"611" "Lillsjöliden" 2013 153 11.4188302254249 23.1051115848223 NA NA
"612" "Lillsjöliden" 2013 154 11.037348388135 22.6847859624796 11.5383558427502 23.5653642755461
"613" "Lillsjöliden" 2013 155 9.78518703009881 21.4987621774107 NA NA
"614" "Lillsjöliden" 2013 156 8.5887277821787 22.3234597826213 NA NA
"615" "Lillsjöliden" 2013 157 8.21536401939924 23.3106093603583 NA NA
"616" "Lillsjöliden" 2013 158 8.61812852116716 24.3753636150331 NA NA
"617" "Lillsjöliden" 2013 159 8.46847464299404 23.8733857178169 NA NA
"618" "Lillsjöliden" 2013 160 8.20088274752761 23.0488871133261 NA NA
"619" "Lillsjöliden" 2013 161 8.27112009559385 23.2347988476343 NA NA
"620" "Lillsjöliden" 2013 162 7.66670398918125 21.6158700044516 NA NA
"621" "Lillsjöliden" 2013 163 7.73518539318013 21.8059075063447 NA NA
"622" "Lillsjöliden" 2013 164 7.94636569790095 22.3780754026094 NA NA
"623" "Lillsjöliden" 2013 165 41.6701314497402 20.8288413169186 NA NA
"624" "Lillsjöliden" 2013 166 23.4612808077373 20.8748940503519 NA NA
"625" "Lillsjöliden" 2013 167 8.32464976180013 22.5215730960576 NA NA
"626" "Lillsjöliden" 2013 168 8.25352744072516 23.319805025268 8.29154948441223 23.4277189127246
"627" "Lillsjöliden" 2013 169 8.35587307991339 23.5226203832632 NA NA
"628" "Lillsjöliden" 2013 170 8.72628223222005 24.4985909110429 NA NA
"629" "Lillsjöliden" 2013 171 8.63845263836965 24.3160355822764 NA NA
"630" "Lillsjöliden" 2013 172 8.39612679232568 23.6519016352338 NA NA
"631" "Lillsjöliden" 2013 173 8.82775227378863 24.8534516899381 NA NA
"632" "Lillsjöliden" 2013 174 8.76829987363089 24.7035759335055 NA NA
"633" "Lillsjöliden" 2013 175 9.28509460269131 26.0786277284244 NA NA
"634" "Lillsjöliden" 2013 176 9.4968033272088 26.6433268518919 NA NA
"635" "Lillsjöliden" 2013 177 9.67154732386961 27.0599633663873 NA NA
"636" "Lillsjöliden" 2013 178 30.6925082270549 24.3686686814111 NA NA
"637" "Lillsjöliden" 2013 179 40.1656107655708 23.5438515601468 NA NA
"638" "Lillsjöliden" 2013 180 18.366840447467 24.639076310706 NA NA
"639" "Lillsjöliden" 2013 181 10.4178443301134 26.1145767231387 NA NA
"640" "Lillsjöliden" 2013 182 9.408998624713 26.5705905928725 9.55175356522825 27.0179343942703
"641" "Lillsjöliden" 2013 183 140.1920694332 57.9690517353155 NA NA
"642" "Lillsjöliden" 2013 184 164.635631942534 46.3291962335485 NA NA
"643" "Lillsjöliden" 2013 185 149.048643925922 41.3737498735052 NA NA
"644" "Lillsjöliden" 2013 186 126.337961078845 36.0320944588039 NA NA
"645" "Lillsjöliden" 2013 187 105.04678714401 31.8129413250444 NA NA
"646" "Lillsjöliden" 2013 188 87.0707909509604 29.6958400069716 NA NA
"647" "Lillsjöliden" 2013 189 75.6609054980876 28.0939597467656 NA NA
"648" "Lillsjöliden" 2013 190 72.3107537327976 28.1421552665204 64.3488136641271 25.4623131188371
"649" "Lillsjöliden" 2013 191 71.6994565951203 26.9129276414288 NA NA
"650" "Lillsjöliden" 2013 192 60.0568135145638 26.6064413436568 NA NA
"651" "Lillsjöliden" 2013 193 52.9528959882272 27.3830892515996 NA NA
"652" "Lillsjöliden" 2013 194 53.5181935239336 27.8345196691087 NA NA
"653" "Lillsjöliden" 2013 195 66.8511813151669 26.0768009044332 NA NA
"654" "Lillsjöliden" 2013 196 58.6945454463158 26.2881044973321 59.6972796098848 27.0596920777134
"655" "Lillsjöliden" 2013 197 54.8994049620162 25.0885112520545 NA NA
"656" "Lillsjöliden" 2013 198 43.5326491321306 26.7356463034325 NA NA
"657" "Lillsjöliden" 2013 199 37.5880755982199 27.2041031138939 NA NA
"658" "Lillsjöliden" 2013 200 32.8251129395563 26.5700954177844 NA NA
"659" "Lillsjöliden" 2013 201 30.749036869063 26.6494303275752 NA NA
"660" "Lillsjöliden" 2013 202 28.6366353520863 26.4469638924382 NA NA
"661" "Lillsjöliden" 2013 203 21.829701736764 27.0354986705837 NA NA
"662" "Lillsjöliden" 2013 204 13.241055946929 27.8602468870212 NA NA
"663" "Lillsjöliden" 2013 205 10.3073239474492 28.9696063433063 NA NA
"664" "Lillsjöliden" 2013 206 10.3981182531004 29.4424459353013 NA NA
"665" "Lillsjöliden" 2013 207 10.4879610057093 29.619322248641 NA NA
"666" "Lillsjöliden" 2013 208 10.4885638442341 29.539209810214 NA NA
"667" "Lillsjöliden" 2013 209 10.5450300560454 29.6581487332268 NA NA
"668" "Lillsjöliden" 2013 210 14.3344363216906 28.8618063564386 11.0737474026854 31.3058102101763
"669" "Lillsjöliden" 2013 211 30.6382621690442 29.1511328079345 NA NA
"670" "Lillsjöliden" 2013 212 217.754489597022 78.4843351703811 NA NA
"671" "Lillsjöliden" 2013 213 162.102851818793 45.1965905550518 NA NA
"672" "Lillsjöliden" 2013 214 128.411897936231 38.0334617866477 NA NA
"673" "Lillsjöliden" 2013 215 107.72650151039 34.1199829332161 NA NA
"674" "Lillsjöliden" 2013 216 95.3218034545347 32.7123696123685 NA NA
"675" "Lillsjöliden" 2013 217 82.7030305544143 31.4406792206166 77.5233698550931 30.8288187441298
"676" "Lillsjöliden" 2013 218 71.1214780134436 30.403281246981 NA NA
"677" "Lillsjöliden" 2013 219 70.5027095077129 30.4668719923237 NA NA
"678" "Lillsjöliden" 2013 220 66.8225519051576 28.8187556130383 NA NA
"679" "Lillsjöliden" 2013 221 55.5970167939298 29.1902853530335 NA NA
"680" "Lillsjöliden" 2013 222 62.3014371921196 29.405545542193 NA NA
"681" "Lillsjöliden" 2013 223 65.1449526128294 28.9182642634292 NA NA
"682" "Lillsjöliden" 2013 224 56.0495533163062 29.1885342530458 58.3772007608333 29.0555253649719
"683" "Lillsjöliden" 2013 225 89.0293412367916 31.6349691964944 NA NA
"684" "Lillsjöliden" 2013 226 88.8564314698628 30.3473715620112 NA NA
"685" "Lillsjöliden" 2013 227 70.8955747621138 30.1973767514625 NA NA
"686" "Lillsjöliden" 2013 228 57.3566470493344 30.0156206639413 NA NA
"687" "Lillsjöliden" 2013 229 88.5615495654459 31.7480706912604 NA NA
"688" "Lillsjöliden" 2013 230 89.803272256764 32.1279020231158 NA NA
"689" "Lillsjöliden" 2013 231 82.4665224072162 32.1948502492537 NA NA
"690" "Lillsjöliden" 2013 232 67.8186903429354 31.1940782891548 NA NA
"691" "Lillsjöliden" 2013 233 59.6198118198296 30.7233115912252 NA NA
"692" "Lillsjöliden" 2013 234 49.8173196167325 29.5397040882305 NA NA
"693" "Lillsjöliden" 2013 235 44.7108399682389 29.2894773949731 NA NA
"694" "Lillsjöliden" 2013 236 41.1986362104113 29.8920579584035 NA NA
"695" "Lillsjöliden" 2013 237 42.9842306625788 31.4596231667329 NA NA
"696" "Lillsjöliden" 2013 238 41.2823100492518 32.016931797068 40.304762286203 31.9359205098451
"697" "Lillsjöliden" 2013 239 37.1007630479949 32.4860255720012 NA NA
"698" "Lillsjöliden" 2013 240 30.6107773283252 32.1916704994889 NA NA
"699" "Lillsjöliden" 2013 241 23.4085639413088 30.9224157536417 NA NA
"700" "Lillsjöliden" 2013 242 22.893527842837 31.072446761632 NA NA
"701" "Lillsjöliden" 2013 243 21.3375405279473 31.4972844010698 NA NA
"702" "Lillsjöliden" 2013 244 54.7227357081072 31.5599296963289 NA NA
"703" "Lillsjöliden" 2013 245 83.3914914988319 28.4977307957441 NA NA
"704" "Lillsjöliden" 2013 246 55.4235680102318 29.0542805780632 NA NA
"705" "Lillsjöliden" 2013 247 39.6011081028632 28.8402157796847 NA NA
"706" "Lillsjöliden" 2013 248 37.2035155073782 29.7701287579475 NA NA
"707" "Lillsjöliden" 2013 249 37.5467153708774 30.7271835665233 NA NA
"708" "Lillsjöliden" 2013 250 36.325374764592 32.0556168487369 NA NA
"709" "Lillsjöliden" 2013 251 33.3962956083716 32.3414975007437 NA NA
"710" "Lillsjöliden" 2013 252 32.1164500990977 32.3061050442519 34.1892886761432 33.218046617864
"711" "Lillsjöliden" 2013 253 33.475868262619 32.1879679109859 NA NA
"712" "Lillsjöliden" 2013 254 35.3596424023737 31.747541590883 NA NA
"713" "Lillsjöliden" 2013 255 30.1600676710975 31.0468903583669 NA NA
"714" "Lillsjöliden" 2013 256 28.7904775103825 31.5448105884766 NA NA
"715" "Lillsjöliden" 2013 257 28.7476602187941 31.966843804521 NA NA
"716" "Lillsjöliden" 2013 258 27.7290503238456 32.7549143349839 NA NA
"717" "Lillsjöliden" 2013 259 28.3935689972417 32.2849612148475 NA NA
"718" "Lillsjöliden" 2013 260 46.0055730580729 29.4263031739082 NA NA
"719" "Lillsjöliden" 2013 261 78.9421334999088 27.7411080971198 NA NA
"720" "Lillsjöliden" 2013 262 173.212359547237 52.7753425815398 NA NA
"721" "Lillsjöliden" 2013 263 362.851117435564 288.620875046348 NA NA
"722" "Lillsjöliden" 2013 264 306.005987067131 177.094812710098 NA NA
"723" "Lillsjöliden" 2013 265 231.582009211672 88.8103947062347 NA NA
"724" "Lillsjöliden" 2013 266 197.021694797601 67.4706050773843 192.065656856906 65.029103046926
"725" "Lillsjöliden" 2013 267 180.018658709728 56.5902925056683 NA NA
"726" "Lillsjöliden" 2013 268 160.867481628009 46.6970717693203 NA NA
"727" "Lillsjöliden" 2013 269 146.162840995408 41.0360877100898 NA NA
"728" "Lillsjöliden" 2013 270 142.931221068218 40.4136678519689 NA NA
"729" "Lillsjöliden" 2013 271 147.908932760325 41.9555327285111 NA NA
"730" "Lillsjöliden" 2013 272 142.926945099306 39.6452368987156 NA NA
"731" "Lillsjöliden" 2013 273 133.83618201818 36.9547064424882 NA NA
"732" "Lillsjöliden" 2013 274 128.183411649754 35.4569830007921 NA NA
"733" "Lillsjöliden" 2014 151 64.0001690785767 23.0100661708184 NA NA
"734" "Lillsjöliden" 2014 152 58.8678665585566 23.9062655847602 NA NA
"735" "Lillsjöliden" 2014 153 52.1979558440786 24.6041861732173 NA NA
"736" "Lillsjöliden" 2014 154 46.6017080897872 24.8681867419435 NA NA
"737" "Lillsjöliden" 2014 155 45.7387070539013 25.325095932366 NA NA
"738" "Lillsjöliden" 2014 156 44.5074936823825 25.7391014670163 NA NA
"739" "Lillsjöliden" 2014 157 45.161386724289 25.281700191526 NA NA
"740" "Lillsjöliden" 2014 158 48.4385056094741 26.3501607627096 NA NA
"741" "Lillsjöliden" 2014 159 97.7203307842109 28.9733066618522 NA NA
"742" "Lillsjöliden" 2014 160 93.440516819305 29.5351540941547 88.6121882334478 28.2035096449491
"743" "Lillsjöliden" 2014 161 75.3626704223802 28.228432962996 NA NA
"744" "Lillsjöliden" 2014 162 65.5274657829719 27.6399112172475 NA NA
"745" "Lillsjöliden" 2014 163 67.3582567151767 26.734433689089 NA NA
"746" "Lillsjöliden" 2014 164 59.6609672817216 26.5536768273639 NA NA
"747" "Lillsjöliden" 2014 165 48.6661999061893 26.6309033301732 NA NA
"748" "Lillsjöliden" 2014 166 41.8062026123462 26.4676457538912 NA NA
"749" "Lillsjöliden" 2014 167 38.217107715914 26.1915821507911 NA NA
"750" "Lillsjöliden" 2014 168 40.6933688011488 25.3656086893473 NA NA
"751" "Lillsjöliden" 2014 169 37.8329562650371 25.6894484342755 32.2197972131169 24.5782830000063
"752" "Lillsjöliden" 2014 170 31.7663029437117 26.4260869194717 NA NA
"753" "Lillsjöliden" 2014 171 32.2172748799574 23.9907319614051 NA NA
"754" "Lillsjöliden" 2014 172 36.3794449039019 22.0579081802877 NA NA
"755" "Lillsjöliden" 2014 173 38.2193018072675 23.1017607027261 NA NA
"756" "Lillsjöliden" 2014 174 35.9342011690874 24.8331641757099 41.407523096125 23.6716934500815
"757" "Lillsjöliden" 2014 175 30.0337456354593 26.0642343676675 NA NA
"758" "Lillsjöliden" 2014 176 24.4274973807927 26.7456439703874 NA NA
"759" "Lillsjöliden" 2014 177 19.6686517498441 27.1039567068744 NA NA
"760" "Lillsjöliden" 2014 178 17.3997741698867 27.1527702748128 NA NA
"761" "Lillsjöliden" 2014 179 14.8321226446391 27.2080178568675 NA NA
"762" "Lillsjöliden" 2014 180 10.9420125725118 27.8994112418537 NA NA
"763" "Lillsjöliden" 2014 181 10.3747782856207 28.5279061861232 NA NA
"764" "Lillsjöliden" 2014 182 11.0006937682218 29.0012452391791 NA NA
"765" "Lillsjöliden" 2014 183 12.9845849902712 26.2804286832935 NA NA
"766" "Lillsjöliden" 2014 184 17.6998634711535 26.7495190894477 NA NA
"767" "Lillsjöliden" 2014 185 31.0935200480515 26.8462668405812 NA NA
"768" "Lillsjöliden" 2014 186 27.5415175728268 29.9205936335405 NA NA
"769" "Lillsjöliden" 2014 187 22.451797490098 32.0115672487981 NA NA
"770" "Lillsjöliden" 2014 188 18.9413187149449 33.3147661036952 17.6650079598041 30.0756463121852
"771" "Lillsjöliden" 2014 189 12.1540575237974 33.5525531967515 NA NA
"772" "Lillsjöliden" 2014 190 12.1881135453475 34.324229618585 NA NA
"773" "Lillsjöliden" 2014 191 12.2834935217156 34.5115471344314 NA NA
"774" "Lillsjöliden" 2014 192 12.2301664846408 34.3140163361992 NA NA
"775" "Lillsjöliden" 2014 193 12.2221951610579 34.3090020111067 NA NA
"776" "Lillsjöliden" 2014 194 12.2875999794162 34.4839200389988 NA NA
"777" "Lillsjöliden" 2014 195 18.8169151982929 34.0022719694142 NA NA
"778" "Lillsjöliden" 2014 196 21.0468494410132 31.7019645268009 NA NA
"779" "Lillsjöliden" 2014 197 15.7072800503428 32.6801646054964 NA NA
"780" "Lillsjöliden" 2014 198 11.7566732069414 33.2227079507592 NA NA
"781" "Lillsjöliden" 2014 199 12.0034325536964 33.8447860963942 NA NA
"782" "Lillsjöliden" 2014 200 11.9176510053353 33.7093790254498 NA NA
"783" "Lillsjöliden" 2014 201 12.3581037082209 34.8126099131206 NA NA
"784" "Lillsjöliden" 2014 202 12.5957100851577 35.5089763446883 10.1702417176343 28.6753258194179
"785" "Lillsjöliden" 2014 203 12.892525626902 36.3171795747488 NA NA
"786" "Lillsjöliden" 2014 204 13.4053890257585 37.6061965032314 NA NA
"787" "Lillsjöliden" 2014 205 13.4630864154019 37.6758234939057 NA NA
"788" "Lillsjöliden" 2014 206 13.455844735673 37.6300958759063 NA NA
"789" "Lillsjöliden" 2014 207 13.6696125140551 38.196537239046 NA NA
"790" "Lillsjöliden" 2014 208 13.762635687972 38.4590165405411 NA NA
"791" "Lillsjöliden" 2014 209 13.1300270779241 36.7313940133269 NA NA
"792" "Lillsjöliden" 2014 210 12.5108367703136 35.2644870991132 NA NA
"793" "Lillsjöliden" 2014 211 13.0268851647442 36.7116209788391 NA NA
"794" "Lillsjöliden" 2014 212 13.5462858092299 38.1091403821596 NA NA
"795" "Lillsjöliden" 2014 213 15.4841661380467 36.5010609813735 NA NA
"796" "Lillsjöliden" 2014 214 41.3974104371516 34.5228467604125 NA NA
"797" "Lillsjöliden" 2014 215 30.3998104942443 36.5005434198947 NA NA
"798" "Lillsjöliden" 2014 216 28.6407903267628 39.077566046281 25.520181022561 33.0154585267521
"799" "Lillsjöliden" 2014 217 28.6251610835256 40.7491567778712 NA NA
"800" "Lillsjöliden" 2014 218 24.2661275719847 41.319218658241 NA NA
"801" "Lillsjöliden" 2014 219 67.0325172568863 42.1427976242587 NA NA
"802" "Lillsjöliden" 2014 220 84.2687713231278 36.5147080969199 NA NA
"803" "Lillsjöliden" 2014 221 95.8423351851312 34.6853768364334 NA NA
"804" "Lillsjöliden" 2014 222 93.7448569559896 35.1827097663777 NA NA
"805" "Lillsjöliden" 2014 223 82.7880770686764 34.450697703996 NA NA
"806" "Lillsjöliden" 2014 224 126.151640962439 38.6470297837282 NA NA
"807" "Lillsjöliden" 2014 225 101.258324763199 35.783338899941 NA NA
"808" "Lillsjöliden" 2014 226 77.2452741955085 33.56011374869 NA NA
"809" "Lillsjöliden" 2014 227 69.5984869557077 32.7291643309155 NA NA
"810" "Lillsjöliden" 2014 228 58.9000647833569 31.4592973113795 NA NA
"811" "Lillsjöliden" 2014 229 50.708365000599 30.8997939297092 NA NA
"812" "Lillsjöliden" 2014 230 129.224923637485 47.9457498129718 88.6733819190311 30.9601246384565
"813" "Lillsjöliden" 2014 231 201.723880169915 57.1364376730534 NA NA
"814" "Lillsjöliden" 2014 232 184.136209334205 51.0609505763148 NA NA
"815" "Lillsjöliden" 2014 233 185.365870221051 57.9093867392143 NA NA
"816" "Lillsjöliden" 2014 234 277.591722600677 101.292252105425 NA NA
"817" "Lillsjöliden" 2014 235 239.033944439397 75.5600986200326 NA NA
"818" "Lillsjöliden" 2014 236 223.512543158196 73.3778612288989 NA NA
"819" "Lillsjöliden" 2014 237 240.044867214834 81.4615974409517 NA NA
"820" "Lillsjöliden" 2014 238 206.961813403881 63.3192126845312 NA NA
"821" "Lillsjöliden" 2014 239 173.474437574694 48.869260281578 NA NA
"822" "Lillsjöliden" 2014 240 155.001481059854 42.8218725457564 NA NA
"823" "Lillsjöliden" 2014 241 147.972807155401 40.9439099824046 NA NA
"824" "Lillsjöliden" 2014 242 139.168138818546 38.8985321049609 NA NA
"825" "Lillsjöliden" 2014 243 128.769705916451 36.590323097363 NA NA
"826" "Lillsjöliden" 2014 244 122.336314744503 35.7227555744204 121.940539364141 35.0602667299906
"827" "Lillsjöliden" 2014 245 114.785009755098 34.7390647605707 NA NA
"828" "Lillsjöliden" 2014 246 112.37119881587 35.0948783151457 NA NA
"829" "Lillsjöliden" 2014 247 112.311359522051 36.1593299231673 NA NA
"830" "Lillsjöliden" 2014 248 110.89842449625 36.9535510447639 NA NA
"831" "Lillsjöliden" 2014 249 106.825186761941 36.6955306737639 NA NA
"832" "Lillsjöliden" 2014 250 106.19931179855 37.098090497227 NA NA
"833" "Lillsjöliden" 2014 251 106.402103147182 37.5963257602127 NA NA
"834" "Lillsjöliden" 2014 252 104.766772084864 37.3070267860702 NA NA
"835" "Lillsjöliden" 2014 253 102.484838281378 36.9851414010657 NA NA
"836" "Lillsjöliden" 2014 254 101.059917169413 36.5898919973718 97.1204952189979 33.6913716456792
"837" "Lillsjöliden" 2014 255 102.507682645106 36.7637464051631 NA NA
"838" "Lillsjöliden" 2014 256 91.1156204091346 34.6202287737884 NA NA
"839" "Lillsjöliden" 2014 257 88.7793382702566 34.9396937309522 NA NA
"840" "Lillsjöliden" 2014 258 86.1508961774208 33.8805376405488 71.7019955848741 31.0233512610737
"841" "Lillsjöliden" 2014 259 90.6198792534907 34.4189294327522 NA NA
"842" "Lillsjöliden" 2014 260 89.2279349255064 34.8692896101615 NA NA
"843" "Lillsjöliden" 2014 261 89.6616120203151 33.7946568219701 NA NA
"844" "Lillsjöliden" 2014 262 78.2887034777384 33.130678310392 NA NA
"845" "Lillsjöliden" 2014 263 73.5869088105834 33.08546604733 NA NA
"846" "Lillsjöliden" 2014 264 87.5836733666269 34.3867696934162 NA NA
"847" "Lillsjöliden" 2014 265 92.335499597148 32.5061730261336 NA NA
"848" "Lillsjöliden" 2014 266 80.3532102436645 31.0953935887531 NA NA
"849" "Lillsjöliden" 2014 267 52.8123212089264 29.3863012398229 NA NA
"850" "Lillsjöliden" 2014 268 68.5798526067667 29.5105995958775 NA NA
"851" "Lillsjöliden" 2014 269 86.2504571050443 30.5673371862781 NA NA
"852" "Lillsjöliden" 2014 270 98.07355446914 29.8604432155864 NA NA
"853" "Lillsjöliden" 2014 271 108.418180335008 33.7181400377443 NA NA
"854" "Lillsjöliden" 2014 272 107.418832500144 34.86613108503 108.189611520372 34.1515085821818
"855" "Lillsjöliden" 2014 273 92.7768050150586 34.2123481082493 NA NA
"856" "Lillsjöliden" 2014 274 69.3826116566159 33.0485645657005 NA NA
"857" "Lillsjöliden" 2015 151 103.383363733742 30.4613002328487 NA NA
"858" "Lillsjöliden" 2015 152 120.178498850693 40.7742143005292 NA NA
"859" "Lillsjöliden" 2015 153 118.593102528341 38.9182963827514 NA NA
"860" "Lillsjöliden" 2015 154 114.019820571953 34.2810672929807 NA NA
"861" "Lillsjöliden" 2015 155 107.306962625699 31.4292865925823 NA NA
"862" "Lillsjöliden" 2015 156 100.220724389834 27.9204634124183 NA NA
"863" "Lillsjöliden" 2015 157 102.809821366501 28.8496010895087 NA NA
"864" "Lillsjöliden" 2015 158 108.93724919246 31.9178123635951 NA NA
"865" "Lillsjöliden" 2015 159 96.951196350804 26.8646405733333 NA NA
"866" "Lillsjöliden" 2015 160 91.8526347302454 25.3892587441834 NA NA
"867" "Lillsjöliden" 2015 161 90.1880218548467 25.0792278459971 85.7438472938513 23.8194526882226
"868" "Lillsjöliden" 2015 162 80.7203952812656 23.050828717313 NA NA
"869" "Lillsjöliden" 2015 163 79.1719702375694 23.0970790862808 NA NA
"870" "Lillsjöliden" 2015 164 78.2745523376215 22.9865335647229 NA NA
"871" "Lillsjöliden" 2015 165 74.5759012387948 22.4045041702243 NA NA
"872" "Lillsjöliden" 2015 166 73.6082338362066 22.0298986714396 NA NA
"873" "Lillsjöliden" 2015 167 68.5710668709036 21.4765156850525 NA NA
"874" "Lillsjöliden" 2015 168 68.551603546754 21.9990959913077 NA NA
"875" "Lillsjöliden" 2015 169 69.5109739971391 22.6426792040256 NA NA
"876" "Lillsjöliden" 2015 170 69.4204164233287 23.3680160034915 NA NA
"877" "Lillsjöliden" 2015 171 69.114601854656 23.9776250566125 NA NA
"878" "Lillsjöliden" 2015 172 65.3076000453757 24.0718052547743 NA NA
"879" "Lillsjöliden" 2015 173 61.9319304281571 24.2711367459002 NA NA
"880" "Lillsjöliden" 2015 174 63.7512510280996 24.8575907222473 NA NA
"881" "Lillsjöliden" 2015 175 61.3234898358225 24.4023736272653 57.0437867402106 22.5717721393383
"882" "Lillsjöliden" 2015 176 93.8884634601159 26.4848927890062 NA NA
"883" "Lillsjöliden" 2015 177 88.477772211586 25.2865132342188 NA NA
"884" "Lillsjöliden" 2015 178 83.8367099631582 25.0439259147331 NA NA
"885" "Lillsjöliden" 2015 179 77.2145316039034 25.2137091834208 NA NA
"886" "Lillsjöliden" 2015 180 68.8606431416024 25.3359360367464 NA NA
"887" "Lillsjöliden" 2015 181 68.175100008119 25.4524109677462 NA NA
"888" "Lillsjöliden" 2015 182 61.4326432925502 24.9749295472412 NA NA
"889" "Lillsjöliden" 2015 183 57.3550375362576 26.0892591147409 NA NA
"890" "Lillsjöliden" 2015 184 49.876848336796 26.8120236467639 NA NA
"891" "Lillsjöliden" 2015 185 41.6725684337719 26.4776121206133 NA NA
"892" "Lillsjöliden" 2015 186 39.4586635090883 26.0048979082875 NA NA
"893" "Lillsjöliden" 2015 187 37.722654017575 25.9511129794427 NA NA
"894" "Lillsjöliden" 2015 188 79.0307102008754 27.1392442330694 71.3625326754733 23.4003010745965
"895" "Lillsjöliden" 2015 189 84.970088473953 25.2740889221285 NA NA
"896" "Lillsjöliden" 2015 190 81.4378298991476 25.9696411257731 NA NA
"897" "Lillsjöliden" 2015 191 99.9960067750811 27.8129277836676 NA NA
"898" "Lillsjöliden" 2015 192 94.5244262797576 28.1965947130298 NA NA
"899" "Lillsjöliden" 2015 193 88.6282042250629 28.0662366392631 NA NA
"900" "Lillsjöliden" 2015 194 80.1547120128777 27.5912431937772 NA NA
"901" "Lillsjöliden" 2015 195 74.0423353640057 27.3430897547335 NA NA
"902" "Lillsjöliden" 2015 196 77.6456672111448 28.0328514189959 NA NA
"903" "Lillsjöliden" 2015 197 68.0174794819046 26.7633529499994 NA NA
"904" "Lillsjöliden" 2015 198 69.5446240273423 26.1332286957674 NA NA
"905" "Lillsjöliden" 2015 199 65.9403473291867 26.2212936036799 NA NA
"906" "Lillsjöliden" 2015 200 71.4666202567462 26.0173400291935 NA NA
"907" "Lillsjöliden" 2015 201 57.2494284346021 25.9099391272596 NA NA
"908" "Lillsjöliden" 2015 202 48.9827087175451 26.2367431406235 NA NA
"909" "Lillsjöliden" 2015 203 50.3876266627366 26.8232857067029 NA NA
"910" "Lillsjöliden" 2015 204 57.7801847079248 26.8824210606947 48.912866252241 22.8253062589745
"911" "Lillsjöliden" 2015 205 72.9224610879532 26.9948959162618 NA NA
"912" "Lillsjöliden" 2015 206 64.2417852891481 26.4652827334137 NA NA
"913" "Lillsjöliden" 2015 207 70.9870951236387 29.1524637683376 NA NA
"914" "Lillsjöliden" 2015 208 138.857351521855 40.7504854397937 NA NA
"915" "Lillsjöliden" 2015 209 153.209720217506 43.6379217456931 NA NA
"916" "Lillsjöliden" 2015 210 138.220331416825 38.2690894603381 NA NA
"917" "Lillsjöliden" 2015 211 141.499501989353 39.7553297926173 NA NA
"918" "Lillsjöliden" 2015 212 158.659084709251 44.5656788222393 NA NA
"919" "Lillsjöliden" 2015 213 140.123807185101 38.6803415836752 NA NA
"920" "Lillsjöliden" 2015 214 132.12521085748 36.5664971279054 NA NA
"921" "Lillsjöliden" 2015 215 123.782207938012 34.3887509570242 NA NA
"922" "Lillsjöliden" 2015 216 122.236975504975 34.0817527904191 99.7791188935584 27.6393494566353
"923" "Lillsjöliden" 2015 217 123.467901950652 34.528024754657 NA NA
"924" "Lillsjöliden" 2015 218 132.782447054131 36.8036763480985 NA NA
"925" "Lillsjöliden" 2015 219 125.54456390662 35.110574399919 NA NA
"926" "Lillsjöliden" 2015 220 118.423136598747 33.7905679207752 NA NA
"927" "Lillsjöliden" 2015 221 110.752704835589 32.6368093257722 NA NA
"928" "Lillsjöliden" 2015 222 111.912767002663 32.6305477811491 NA NA
"929" "Lillsjöliden" 2015 223 116.581395707256 33.8895442043227 NA NA
"930" "Lillsjöliden" 2015 224 114.40377398502 33.248287250225 NA NA
"931" "Lillsjöliden" 2015 225 107.181546876412 32.3565431152289 NA NA
"932" "Lillsjöliden" 2015 226 106.314039350728 32.7808598182848 NA NA
"933" "Lillsjöliden" 2015 227 104.266015414155 32.584634713442 NA NA
"934" "Lillsjöliden" 2015 228 105.076398300063 33.1271802771372 NA NA
"935" "Lillsjöliden" 2015 229 100.106056102564 32.9322482271198 NA NA
"936" "Lillsjöliden" 2015 230 97.9897182690085 33.2960336597797 NA NA
"937" "Lillsjöliden" 2015 231 95.5460880765871 33.6523230570361 77.4742319325992 26.8760279189161
"938" "Lillsjöliden" 2015 232 91.6571858224059 33.6254007047415 NA NA
"939" "Lillsjöliden" 2015 233 85.6298852864434 33.7553049083552 NA NA
"940" "Lillsjöliden" 2015 234 81.248382156629 34.656273727186 NA NA
"941" "Lillsjöliden" 2015 235 73.3049608831513 34.6765789108492 NA NA
"942" "Lillsjöliden" 2015 236 69.7621302119651 34.8453885683 NA NA
"943" "Lillsjöliden" 2015 237 63.3349867614574 34.4369331913973 NA NA
"944" "Lillsjöliden" 2015 238 69.0261354986013 34.9700299263398 NA NA
"945" "Lillsjöliden" 2015 239 89.0830965809344 35.0225032361837 NA NA
"946" "Lillsjöliden" 2015 240 153.371239305198 44.0565372657965 NA NA
"947" "Lillsjöliden" 2015 241 128.679568604033 35.9060504894297 NA NA
"948" "Lillsjöliden" 2015 242 117.199553506861 34.2875808940832 NA NA
"949" "Lillsjöliden" 2015 243 114.630157970723 34.3343236286156 NA NA
"950" "Lillsjöliden" 2015 244 119.033110201598 33.5731526548701 NA NA
"951" "Lillsjöliden" 2015 245 109.262390705967 32.44362020409 107.194810953108 31.318830815679
"952" "Lillsjöliden" 2015 246 109.71533732471 34.0762999800935 NA NA
"953" "Lillsjöliden" 2015 247 106.288946717866 34.1632707068015 NA NA
"954" "Lillsjöliden" 2015 248 113.475921113405 35.1699998320217 NA NA
"955" "Lillsjöliden" 2015 249 106.487129420064 34.4430833438692 NA NA
"956" "Lillsjöliden" 2015 250 98.6810473606154 33.1282078788013 NA NA
"957" "Lillsjöliden" 2015 251 92.2880519949872 33.6075563546871 NA NA
"958" "Lillsjöliden" 2015 252 91.9452021098011 33.7386152657696 NA NA
"959" "Lillsjöliden" 2015 253 91.2587389330483 34.820840389041 NA NA
"960" "Lillsjöliden" 2015 254 91.783831897816 35.4596075123579 NA NA
"961" "Lillsjöliden" 2015 255 94.6194699052662 35.4518488902631 NA NA
"962" "Lillsjöliden" 2015 256 103.730453128363 36.7975809136402 NA NA
"963" "Lillsjöliden" 2015 257 113.937675121911 36.7199108253244 91.741020333407 28.9592891519395
"964" "Lillsjöliden" 2015 258 111.468684137345 36.7463514169781 NA NA
"965" "Lillsjöliden" 2015 259 139.966399084474 39.4703915830701 NA NA
"966" "Lillsjöliden" 2015 260 155.848573382036 46.7326163645607 NA NA
"967" "Lillsjöliden" 2015 261 225.57302463857 89.8431522755666 NA NA
"968" "Lillsjöliden" 2015 262 226.505156735317 84.1799707403153 NA NA
"969" "Lillsjöliden" 2015 263 212.239792686018 70.9050992947127 NA NA
"970" "Lillsjöliden" 2015 264 209.184920777829 69.52771522325 NA NA
"971" "Lillsjöliden" 2015 265 211.484024894731 70.6715937092595 NA NA
"972" "Lillsjöliden" 2015 266 210.286560952885 69.3091962996836 NA NA
"973" "Lillsjöliden" 2015 267 220.303976091029 73.7951924719785 NA NA
"974" "Lillsjöliden" 2015 268 218.962058575954 75.0547741226681 NA NA
"975" "Lillsjöliden" 2015 269 214.906023972537 72.9940498114955 NA NA
"976" "Lillsjöliden" 2015 270 209.199343767264 68.8150161640748 NA NA
"977" "Lillsjöliden" 2015 271 202.697921975699 65.562418228956 174.093438420338 56.0066071820045
"978" "Lillsjöliden" 2015 272 205.183699913918 66.2418695053893 NA NA
"979" "Lillsjöliden" 2015 273 209.70843990668 67.8584942304969 NA NA
"980" "Lillsjöliden" 2015 274 215.047686769295 69.9519494869778 NA NA
"981" "Struptjärn" 2012 151 64.1636484313254 16.3099025755269 NA NA
"982" "Struptjärn" 2012 152 62.0787167668039 15.7799290912202 58.8267304615292 14.9532993544036
"983" "Struptjärn" 2012 153 59.6080565336353 15.1519063916797 NA NA
"984" "Struptjärn" 2012 154 60.027913207352 15.2586307069488 NA NA
"985" "Struptjärn" 2012 155 76.1867346925147 19.3660780015087 NA NA
"986" "Struptjärn" 2012 156 72.9285189623879 18.5378647931327 NA NA
"987" "Struptjärn" 2012 157 69.1569872547051 17.5791706381602 NA NA
"988" "Struptjärn" 2012 158 69.1723466055959 17.5830748662205 NA NA
"989" "Struptjärn" 2012 159 71.076341518495 18.0670556293611 NA NA
"990" "Struptjärn" 2012 160 68.3780516140799 17.3811712300562 NA NA
"991" "Struptjärn" 2012 161 66.8278246033497 16.9871155282202 NA NA
"992" "Struptjärn" 2012 162 69.5756226095561 17.6855845036311 NA NA
"993" "Struptjärn" 2012 163 85.5921215690889 21.7568545142603 NA NA
"994" "Struptjärn" 2012 164 85.1526057046862 21.6451329849511 NA NA
"995" "Struptjärn" 2012 165 79.3226653572565 20.1632072931868 74.9254296985695 19.0454640390516
"996" "Struptjärn" 2012 166 79.2708834560916 20.1500447348875 NA NA
"997" "Struptjärn" 2012 167 76.7893131096943 19.5192487690475 NA NA
"998" "Struptjärn" 2012 168 69.7736230476163 17.7359146817557 NA NA
"999" "Struptjärn" 2012 169 74.5086312357602 18.9395170973136 NA NA
"1000" "Struptjärn" 2012 170 75.1155061943694 19.0937800124132 NA NA
"1001" "Struptjärn" 2012 171 79.3777303402754 20.1772043854706 NA NA
"1002" "Struptjärn" 2012 172 82.433576366403 20.953976782154 NA NA
"1003" "Struptjärn" 2012 173 73.7059773080491 18.7354886842964 NA NA
"1004" "Struptjärn" 2012 174 72.071533823954 18.3200258070673 NA NA
"1005" "Struptjärn" 2012 175 70.571692411687 17.9387777341964 NA NA
"1006" "Struptjärn" 2012 176 71.0332334155584 18.0560978834053 NA NA
"1007" "Struptjärn" 2012 177 73.7046852597867 18.7351602556332 NA NA
"1008" "Struptjärn" 2012 178 71.258136512266 18.1132665090355 67.8016337596806 17.234650275
"1009" "Struptjärn" 2012 179 70.4681114651674 17.9124482596774 NA NA
"1010" "Struptjärn" 2012 180 66.6740206320199 16.9480197497 NA NA
"1011" "Struptjärn" 2012 181 62.5526848887718 15.900408117619 NA NA
"1012" "Struptjärn" 2012 182 71.1391393310103 18.0830183470233 NA NA
"1013" "Struptjärn" 2012 183 75.8007153083685 19.2679548632269 NA NA
"1014" "Struptjärn" 2012 184 84.3351029841996 21.4373301237931 NA NA
"1015" "Struptjärn" 2012 185 81.0392150190613 20.5995409249947 NA NA
"1016" "Struptjärn" 2012 186 75.9603314293121 19.3085280451721 NA NA
"1017" "Struptjärn" 2012 187 75.4053270100588 19.1674502195136 NA NA
"1018" "Struptjärn" 2012 188 75.3942617194662 19.1646375083298 NA NA
"1019" "Struptjärn" 2012 189 73.4141972858701 18.6613204620776 NA NA
"1020" "Struptjärn" 2012 190 71.2617367364063 18.1141816581333 NA NA
"1021" "Struptjärn" 2012 191 70.8821110065589 18.0176837372646 NA NA
"1022" "Struptjärn" 2012 192 67.5735004183005 17.1766605461877 66.6994268056909 16.9544778023128
"1023" "Struptjärn" 2012 193 62.8136041970655 15.9667317853403 NA NA
"1024" "Struptjärn" 2012 194 66.3937994009442 16.8767896826733 NA NA
"1025" "Struptjärn" 2012 195 66.5520341669047 16.9170117348785 NA NA
"1026" "Struptjärn" 2012 196 66.250035968805 16.8402461314658 NA NA
"1027" "Struptjärn" 2012 197 74.3115848031905 18.8894294199973 NA NA
"1028" "Struptjärn" 2012 198 73.2791539528381 18.6269934925384 NA NA
"1029" "Struptjärn" 2012 199 66.4890855340111 16.9010106798441 NA NA
"1030" "Struptjärn" 2012 200 62.6509522553614 15.9253869212658 NA NA
"1031" "Struptjärn" 2012 201 58.7102950359691 14.9237023708521 NA NA
"1032" "Struptjärn" 2012 202 58.6582813692944 14.9104808995549 NA NA
"1033" "Struptjärn" 2012 203 50.2298777623426 12.7680459686028 NA NA
"1034" "Struptjärn" 2012 204 44.7438678338803 11.3735447260906 NA NA
"1035" "Struptjärn" 2012 205 45.0636784852326 11.4548381171882 NA NA
"1036" "Struptjärn" 2012 206 53.1773695870545 13.5172755663347 NA NA
"1037" "Struptjärn" 2012 207 47.8692622582031 12.1679957870424 NA NA
"1038" "Struptjärn" 2012 208 45.4149775199682 11.5441356115092 NA NA
"1039" "Struptjärn" 2012 209 38.5488797866696 9.79882673581455 NA NA
"1040" "Struptjärn" 2012 210 33.1800973800831 8.43412382160373 NA NA
"1041" "Struptjärn" 2012 211 30.4823896546329 7.74838740768345 NA NA
"1042" "Struptjärn" 2012 212 30.9888715294416 7.87713117828187 NA NA
"1043" "Struptjärn" 2012 213 29.2099039281854 7.42493138960305 NA NA
"1044" "Struptjärn" 2012 214 37.1742283673794 9.44940098974076 NA NA
"1045" "Struptjärn" 2012 215 55.886672509116 14.2059593894454 NA NA
"1046" "Struptjärn" 2012 216 46.7256560023985 11.8772999324122 NA NA
"1047" "Struptjärn" 2012 217 52.0079143262732 13.220009094803 NA NA
"1048" "Struptjärn" 2012 218 58.4890115342957 14.8674538182511 NA NA
"1049" "Struptjärn" 2012 219 51.9388546550288 13.2024546611411 NA NA
"1050" "Struptjärn" 2012 220 46.4781121041549 11.8143761903522 47.2121734773876 12.0009689071722
"1051" "Struptjärn" 2012 221 42.9719872258954 10.9231463962228 NA NA
"1052" "Struptjärn" 2012 222 37.6204144612903 9.56281803973959 NA NA
"1053" "Struptjärn" 2012 223 36.9578054906625 9.39438797036506 NA NA
"1054" "Struptjärn" 2012 224 33.6835545538908 8.56209873662968 NA NA
"1055" "Struptjärn" 2012 225 29.1875889194326 7.41925908717594 NA NA
"1056" "Struptjärn" 2012 226 24.358211579339 6.1916687639466 NA NA
"1057" "Struptjärn" 2012 227 20.2757008471917 5.15392614904323 NA NA
"1058" "Struptjärn" 2012 228 16.6085577627742 4.22176677376421 NA NA
"1059" "Struptjärn" 2012 229 13.1174578538698 3.33435621049794 NA NA
"1060" "Struptjärn" 2012 230 9.09008390009675 2.7056747304563 NA NA
"1061" "Struptjärn" 2012 231 9.94427590868897 5.57778773339044 NA NA
"1062" "Struptjärn" 2012 232 14.0213995281718 7.86466415567444 NA NA
"1063" "Struptjärn" 2012 233 13.8867510120701 7.78913921566597 NA NA
"1064" "Struptjärn" 2012 234 10.3456156394986 5.80290093901622 11.788462279389 2.99653582663544
"1065" "Struptjärn" 2012 235 26.7070250329928 7.48470165881698 NA NA
"1066" "Struptjärn" 2012 236 18.7033665713101 4.75425095159496 NA NA
"1067" "Struptjärn" 2012 237 24.4847486690228 6.2238335122954 NA NA
"1068" "Struptjärn" 2012 238 22.848230082586 5.80784316011971 NA NA
"1069" "Struptjärn" 2012 239 27.0537421620451 6.87685176504019 NA NA
"1070" "Struptjärn" 2012 240 772.014449721625 197.203370154987 NA NA
"1071" "Struptjärn" 2012 241 437.849660225964 111.8539072118 NA NA
"1072" "Struptjärn" 2012 242 188.134770568232 47.8964311821507 NA NA
"1073" "Struptjärn" 2012 243 137.28456368963 34.8966730172475 NA NA
"1074" "Struptjärn" 2012 244 181.606214140468 46.2710705745439 NA NA
"1075" "Struptjärn" 2012 245 266.391751037174 68.0110313716299 NA NA
"1076" "Struptjärn" 2012 246 166.214941406599 42.25055100849 NA NA
"1077" "Struptjärn" 2012 247 123.028297025887 31.2728404257257 NA NA
"1078" "Struptjärn" 2012 248 94.3306001048691 23.9781080910336 NA NA
"1079" "Struptjärn" 2012 249 111.742348038442 28.4040395866553 NA NA
"1080" "Struptjärn" 2012 250 82.9247042147554 21.0788176781222 78.9616830048654 20.0714483745012
"1081" "Struptjärn" 2012 251 67.2013397937874 17.0820601972883 NA NA
"1082" "Struptjärn" 2012 252 63.6007689995671 16.1668229826703 NA NA
"1083" "Struptjärn" 2012 253 56.3957687263283 14.3353677056384 NA NA
"1084" "Struptjärn" 2012 254 53.7243651884082 13.6563176125 NA NA
"1085" "Struptjärn" 2012 255 60.1391069254609 15.2868952890558 NA NA
"1086" "Struptjärn" 2012 256 63.9903487754238 16.2658511449547 NA NA
"1087" "Struptjärn" 2012 257 54.2671694145932 13.7942942435535 NA NA
"1088" "Struptjärn" 2012 258 51.539655153605 13.1009812391085 NA NA
"1089" "Struptjärn" 2012 259 69.7649648771134 17.7337138418591 NA NA
"1090" "Struptjärn" 2012 260 60.3438751588102 15.338945788336 60.1925255870408 15.3004738991782
"1091" "Struptjärn" 2012 261 62.610833179093 15.9151889627433 NA NA
"1092" "Struptjärn" 2012 262 81.467574940375 20.7084266999576 NA NA
"1093" "Struptjärn" 2012 263 76.0521183581302 19.3318595717192 NA NA
"1094" "Struptjärn" 2012 264 63.3518137217108 16.1035404788419 NA NA
"1095" "Struptjärn" 2012 265 54.9896143358304 13.9779341482291 NA NA
"1096" "Struptjärn" 2012 266 45.7383064635227 11.6263233252404 NA NA
"1097" "Struptjärn" 2012 267 45.1776196261272 11.4838010728924 NA NA
"1098" "Struptjärn" 2012 268 41.3269408896797 10.5049883560885 NA NA
"1099" "Struptjärn" 2012 269 39.7230674014243 10.097296135081 NA NA
"1100" "Struptjärn" 2012 270 39.0513555682375 9.92655218853264 NA NA
"1101" "Struptjärn" 2012 271 246.529409426687 62.955136155091 NA NA
"1102" "Struptjärn" 2012 272 159.900556176567 40.7994645840974 NA NA
"1103" "Struptjärn" 2012 273 89.1695106161855 22.666199108269 NA NA
"1104" "Struptjärn" 2012 274 101.53167135649 25.8085646411948 NA NA
"1105" "Struptjärn" 2013 151 25.4213785350785 6.46191757138764 NA NA
"1106" "Struptjärn" 2013 152 24.1310396748152 6.13392342493825 NA NA
"1107" "Struptjärn" 2013 153 23.5085047640941 5.97567987127573 NA NA
"1108" "Struptjärn" 2013 154 28.1152974401128 7.14669089649718 NA NA
"1109" "Struptjärn" 2013 155 32.5113827932461 8.26414175186811 32.277760007755 8.20475664887071
"1110" "Struptjärn" 2013 156 26.6599054731609 6.77674152842789 NA NA
"1111" "Struptjärn" 2013 157 23.925899203023 6.0817783055283 NA NA
"1112" "Struptjärn" 2013 158 20.9365853092823 5.32191786170141 NA NA
"1113" "Struptjärn" 2013 159 18.226619901572 4.63306563986884 NA NA
"1114" "Struptjärn" 2013 160 14.5773334708212 3.70544528767766 NA NA
"1115" "Struptjärn" 2013 161 13.0059555012313 3.30601317588354 NA NA
"1116" "Struptjärn" 2013 162 13.6729521913677 3.4755585695805 NA NA
"1117" "Struptjärn" 2013 163 13.6499848730462 3.46972045511222 NA NA
"1118" "Struptjärn" 2013 164 13.6690014908433 3.47455433209974 NA NA
"1119" "Struptjärn" 2013 165 44.9261694937415 11.4198843963617 NA NA
"1120" "Struptjärn" 2013 166 52.1354872805419 13.2524371519079 NA NA
"1121" "Struptjärn" 2013 167 43.0609145813003 10.9457510413515 NA NA
"1122" "Struptjärn" 2013 168 34.1503129024955 8.68074509446897 NA NA
"1123" "Struptjärn" 2013 169 26.6936529723211 6.78531988138827 26.2707233105759 6.67781443635815
"1124" "Struptjärn" 2013 170 22.3478975152046 5.68066249585175 NA NA
"1125" "Struptjärn" 2013 171 26.3962394768085 6.70971967387127 NA NA
"1126" "Struptjärn" 2013 172 29.0142874994664 7.37520720819225 NA NA
"1127" "Struptjärn" 2013 173 51.010337488485 12.9664327874435 NA NA
"1128" "Struptjärn" 2013 174 53.4124053052092 13.577019825874 NA NA
"1129" "Struptjärn" 2013 175 41.0573123222965 10.4364508621475 NA NA
"1130" "Struptjärn" 2013 176 33.6890547555332 8.56349684529597 NA NA
"1131" "Struptjärn" 2013 177 26.3177141892367 6.68975915383659 NA NA
"1132" "Struptjärn" 2013 178 47.9120806553516 12.1788798920303 NA NA
"1133" "Struptjärn" 2013 179 49.9438402572027 12.6953374497477 NA NA
"1134" "Struptjärn" 2013 180 41.5350134881285 10.5578787993895 NA NA
"1135" "Struptjärn" 2013 181 36.5882189485124 9.30044193326986 NA NA
"1136" "Struptjärn" 2013 182 30.0722878007094 7.64414269206859 NA NA
"1137" "Struptjärn" 2013 183 228.131137772478 58.2119983010781 191.542208611926 48.6885462086125
"1138" "Struptjärn" 2013 184 217.233396519538 55.3489589643709 NA NA
"1139" "Struptjärn" 2013 185 117.259656374228 29.8064966419478 NA NA
"1140" "Struptjärn" 2013 186 95.6478838870707 24.3129514279898 NA NA
"1141" "Struptjärn" 2013 187 122.723878686858 31.1954596412291 NA NA
"1142" "Struptjärn" 2013 188 80.0840768648194 20.3567522023658 NA NA
"1143" "Struptjärn" 2013 189 56.556722943849 14.3762810213719 NA NA
"1144" "Struptjärn" 2013 190 48.8867440964717 12.4266317913882 NA NA
"1145" "Struptjärn" 2013 191 47.448621541929 12.0610721742265 NA NA
"1146" "Struptjärn" 2013 192 39.5263531483921 10.0472928952308 NA NA
"1147" "Struptjärn" 2013 193 34.7082423052297 8.8225664282785 NA NA
"1148" "Struptjärn" 2013 194 32.6126017988386 8.28987083929325 NA NA
"1149" "Struptjärn" 2013 195 31.9888615726178 8.13132090376415 NA NA
"1150" "Struptjärn" 2013 196 30.743252993273 7.81469684835218 NA NA
"1151" "Struptjärn" 2013 197 38.533705251667 9.79496948652198 39.9063413057642 10.1438829423699
"1152" "Struptjärn" 2013 198 30.4840258265418 7.74880330991288 NA NA
"1153" "Struptjärn" 2013 199 27.8126714913279 7.06976572372135 NA NA
"1154" "Struptjärn" 2013 200 23.9369089767575 6.08457690475668 NA NA
"1155" "Struptjärn" 2013 201 23.283474177428 5.91847883868535 NA NA
"1156" "Struptjärn" 2013 202 22.813220393867 5.79894396834734 NA NA
"1157" "Struptjärn" 2013 203 19.3216224900769 4.91140681863738 NA NA
"1158" "Struptjärn" 2013 204 17.6003168023361 4.47386424186511 NA NA
"1159" "Struptjärn" 2013 205 18.0698999222595 4.59322863469977 NA NA
"1160" "Struptjärn" 2013 206 18.1108111238567 4.61226593885076 NA NA
"1161" "Struptjärn" 2013 207 17.9493505872471 4.58293638247037 NA NA
"1162" "Struptjärn" 2013 208 16.7270921768347 4.27604359393395 NA NA
"1163" "Struptjärn" 2013 209 16.5959943906 4.25802108676522 NA NA
"1164" "Struptjärn" 2013 210 19.081446493531 4.89152687375668 NA NA
"1165" "Struptjärn" 2013 211 23.0786791222142 5.86642152149488 21.6031386782394 5.49135056658751
"1166" "Struptjärn" 2013 212 321.820196319409 82.101528595283 NA NA
"1167" "Struptjärn" 2013 213 159.368925089529 40.5103466732988 NA NA
"1168" "Struptjärn" 2013 214 96.8645443906662 24.6222171067078 NA NA
"1169" "Struptjärn" 2013 215 70.2575097297965 17.8589149293554 NA NA
"1170" "Struptjärn" 2013 216 57.296334820257 14.5642846331183 NA NA
"1171" "Struptjärn" 2013 217 50.1737562533302 12.7537803155926 NA NA
"1172" "Struptjärn" 2013 218 42.1036783887726 10.7024290136366 NA NA
"1173" "Struptjärn" 2013 219 42.1083578773126 10.7036185033876 NA NA
"1174" "Struptjärn" 2013 220 38.0750326651418 9.67837846679065 NA NA
"1175" "Struptjärn" 2013 221 33.7560566860728 8.58052821720501 NA NA
"1176" "Struptjärn" 2013 222 38.5686403944506 9.80384972929484 32.8694107262821 8.35514968003146
"1177" "Struptjärn" 2013 223 50.6999208944173 12.8875272929642 NA NA
"1178" "Struptjärn" 2013 224 40.8831501414178 10.3921801844052 NA NA
"1179" "Struptjärn" 2013 225 51.850764053362 13.1800627123331 54.2459626200538 13.7889036405979
"1180" "Struptjärn" 2013 226 63.6137177323871 16.1701144502837 NA NA
"1181" "Struptjärn" 2013 227 48.3828008161504 12.2985333118507 NA NA
"1182" "Struptjärn" 2013 228 41.4445477390873 10.5348831065111 NA NA
"1183" "Struptjärn" 2013 229 110.015571845389 27.9651064497939 NA NA
"1184" "Struptjärn" 2013 230 124.045090492294 31.5313014512747 NA NA
"1185" "Struptjärn" 2013 231 101.252613426706 25.7376302763485 NA NA
"1186" "Struptjärn" 2013 232 77.5757886077533 19.7191647505258 NA NA
"1187" "Struptjärn" 2013 233 58.115821739166 14.7725918621505 NA NA
"1188" "Struptjärn" 2013 234 46.0392368163681 11.7028174906584 NA NA
"1189" "Struptjärn" 2013 235 39.1341008126517 9.94758538891914 NA NA
"1190" "Struptjärn" 2013 236 36.4017734662096 9.25304893542216 NA NA
"1191" "Struptjärn" 2013 237 34.1414167519267 8.67848376188233 NA NA
"1192" "Struptjärn" 2013 238 31.9190488710247 8.11357505561874 NA NA
"1193" "Struptjärn" 2013 239 30.9254665760248 7.86101413010403 30.6558441277289 7.79247819158755
"1194" "Struptjärn" 2013 240 29.33055319413 7.45559949875012 NA NA
"1195" "Struptjärn" 2013 241 24.822183504209 6.3096068344494 NA NA
"1196" "Struptjärn" 2013 242 22.8122547835618 5.79869851768501 NA NA
"1197" "Struptjärn" 2013 243 22.0432144185116 5.60321441200731 NA NA
"1198" "Struptjärn" 2013 244 42.1821294918776 10.7223706765543 NA NA
"1199" "Struptjärn" 2013 245 114.420698938177 29.0848556453697 NA NA
"1200" "Struptjärn" 2013 246 64.7126165939545 16.4494460314937 NA NA
"1201" "Struptjärn" 2013 247 49.3626951787897 12.5476148709529 NA NA
"1202" "Struptjärn" 2013 248 44.7100756885438 11.364955024418 NA NA
"1203" "Struptjärn" 2013 249 44.7133612299907 11.365790183612 NA NA
"1204" "Struptjärn" 2013 250 41.8471850572907 10.637230394948 NA NA
"1205" "Struptjärn" 2013 251 40.1156345515705 10.1970836647769 NA NA
"1206" "Struptjärn" 2013 252 40.5845463189265 10.3162774049876 NA NA
"1207" "Struptjärn" 2013 253 40.5173147157821 10.2991876520809 42.9705124278584 10.922771513982
"1208" "Struptjärn" 2013 254 40.5761017382945 10.3141308579821 NA NA
"1209" "Struptjärn" 2013 255 35.2756949761036 8.96680850310504 NA NA
"1210" "Struptjärn" 2013 256 34.5408977828576 8.78002874653556 NA NA
"1211" "Struptjärn" 2013 257 34.0510762840748 8.65551991451213 NA NA
"1212" "Struptjärn" 2013 258 33.8153511977347 8.59560042291823 NA NA
"1213" "Struptjärn" 2013 259 35.3682689488627 8.99034009012736 NA NA
"1214" "Struptjärn" 2013 260 40.0556509753501 10.1818363041887 NA NA
"1215" "Struptjärn" 2013 261 43.2361217243509 10.9902873403862 NA NA
"1216" "Struptjärn" 2013 262 129.901126518774 33.0198604625798 NA NA
"1217" "Struptjärn" 2013 263 238.480360648326 60.7617823835544 NA NA
"1218" "Struptjärn" 2013 264 319.899047143869 81.7007421491789 NA NA
"1219" "Struptjärn" 2013 265 157.561179069443 40.050831633401 NA NA
"1220" "Struptjärn" 2013 266 119.501329021119 30.376312470238 NA NA
"1221" "Struptjärn" 2013 267 101.063978957361 25.6896808549451 98.4856503886142 25.034289698238
"1222" "Struptjärn" 2013 268 81.1479519108196 20.6271810008679 NA NA
"1223" "Struptjärn" 2013 269 66.6542494681073 16.9429940729328 NA NA
"1224" "Struptjärn" 2013 270 73.1993084922137 18.6066973947366 NA NA
"1225" "Struptjärn" 2013 271 82.0898240622872 20.8665976083179 NA NA
"1226" "Struptjärn" 2013 272 73.9712168140325 18.8029105128167 NA NA
"1227" "Struptjärn" 2013 273 67.3169160373657 17.1114387834332 NA NA
"1228" "Struptjärn" 2013 274 61.9034085493111 15.735367099845 NA NA
"1229" "Struptjärn" 2014 151 144.062075188829 36.6859042813165 NA NA
"1230" "Struptjärn" 2014 152 212.137188308788 54.1769278397489 NA NA
"1231" "Struptjärn" 2014 153 126.004192884458 32.0292901089158 NA NA
"1232" "Struptjärn" 2014 154 108.509529322119 27.5822821025247 NA NA
"1233" "Struptjärn" 2014 155 103.139953107392 26.2173774084315 NA NA
"1234" "Struptjärn" 2014 156 98.1620160466798 24.9520243546036 NA NA
"1235" "Struptjärn" 2014 157 94.1001293471569 23.9195242090896 NA NA
"1236" "Struptjärn" 2014 158 82.4466671790834 20.9573043653677 NA NA
"1237" "Struptjärn" 2014 159 76.5642632658947 19.4620428414428 NA NA
"1238" "Struptjärn" 2014 160 82.498278040316 20.9704234466408 NA NA
"1239" "Struptjärn" 2014 161 96.1173572040166 24.4322879097579 89.9790949679178 22.8719891814061
"1240" "Struptjärn" 2014 162 76.5316342008245 19.4537487857674 NA NA
"1241" "Struptjärn" 2014 163 73.3802617287484 18.6526943062397 NA NA
"1242" "Struptjärn" 2014 164 61.0136282361495 15.5091918343157 NA NA
"1243" "Struptjärn" 2014 165 48.3464841859078 12.2893019056634 NA NA
"1244" "Struptjärn" 2014 166 40.9221612114846 10.4020964963312 NA NA
"1245" "Struptjärn" 2014 167 35.0988191385692 8.92184803485428 NA NA
"1246" "Struptjärn" 2014 168 31.3368820443066 7.9655927563167 NA NA
"1247" "Struptjärn" 2014 169 32.9766238965259 8.38240243769473 NA NA
"1248" "Struptjärn" 2014 170 31.6154247782127 8.03639616236042 NA NA
"1249" "Struptjärn" 2014 171 36.3674255697508 9.24431796611766 NA NA
"1250" "Struptjärn" 2014 172 37.2239228263645 9.46203293640223 NA NA
"1251" "Struptjärn" 2014 173 38.0014637723209 9.65967782392148 NA NA
"1252" "Struptjärn" 2014 174 35.6584622187317 9.06410497219609 NA NA
"1253" "Struptjärn" 2014 175 33.9639309023951 8.63336823330556 32.2751463259837 8.20409227120369
"1254" "Struptjärn" 2014 176 30.0501259046984 7.6385093097148 NA NA
"1255" "Struptjärn" 2014 177 26.2762630718737 6.67922260078255 NA NA
"1256" "Struptjärn" 2014 178 22.421179228521 5.69929013991465 NA NA
"1257" "Struptjärn" 2014 179 19.4128394419213 4.93459346145135 NA NA
"1258" "Struptjärn" 2014 180 17.3022325644474 4.39809353683002 NA NA
"1259" "Struptjärn" 2014 181 16.2765094362984 4.13736266041358 NA NA
"1260" "Struptjärn" 2014 182 16.1738496669746 4.11126734200461 NA NA
"1261" "Struptjärn" 2014 183 14.1288835755126 3.59145279689344 NA NA
"1262" "Struptjärn" 2014 184 17.712263008641 4.50232010064449 NA NA
"1263" "Struptjärn" 2014 185 18.8164349245112 4.78299205142596 NA NA
"1264" "Struptjärn" 2014 186 15.5516943067625 4.27100226138209 NA NA
"1265" "Struptjärn" 2014 187 11.047882592794 6.1968055363569 NA NA
"1266" "Struptjärn" 2014 188 8.02125341585927 4.49915602907829 NA NA
"1267" "Struptjärn" 2014 189 7.58074079639148 4.25207057933486 8.01702081270536 2.03786461022622
"1268" "Struptjärn" 2014 190 7.33103806007744 4.11201122535118 NA NA
"1269" "Struptjärn" 2014 191 5.48571934739748 3.07696391026325 NA NA
"1270" "Struptjärn" 2014 192 4.97424362789916 2.79007494817683 NA NA
"1271" "Struptjärn" 2014 193 4.46635343982846 2.50519712630799 NA NA
"1272" "Struptjärn" 2014 194 4.18123261098049 2.34527160973089 NA NA
"1273" "Struptjärn" 2014 195 7.82431131476658 4.38869034552831 NA NA
"1274" "Struptjärn" 2014 196 13.1379288816601 7.36912161641146 NA NA
"1275" "Struptjärn" 2014 197 18.735212745129 7.77352317046473 NA NA
"1276" "Struptjärn" 2014 198 26.0706706604777 7.79741440561029 NA NA
"1277" "Struptjärn" 2014 199 22.1155654395831 10.2698243448308 20.5147591389459 5.21469291564247
"1278" "Struptjärn" 2014 200 18.5683901324869 4.71994098604562 NA NA
"1279" "Struptjärn" 2014 201 19.7599425813122 5.022824391667 NA NA
"1280" "Struptjärn" 2014 202 17.6979236858329 9.13514017053383 NA NA
"1281" "Struptjärn" 2014 203 22.7309240598849 12.7498744558236 23.8239448358273 6.05586229487796
"1282" "Struptjärn" 2014 204 25.0217462456508 14.0348066122191 NA NA
"1283" "Struptjärn" 2014 205 27.6821043613965 15.5270130836291 NA NA
"1284" "Struptjärn" 2014 206 30.83624802155 17.296186020754 NA NA
"1285" "Struptjärn" 2014 207 19.3954679577437 10.8790025791162 NA NA
"1286" "Struptjärn" 2014 208 15.3927979848721 8.63388753197777 NA NA
"1287" "Struptjärn" 2014 209 22.4649937284311 12.6007129729425 NA NA
"1288" "Struptjärn" 2014 210 36.012118182781 20.1993541709569 NA NA
"1289" "Struptjärn" 2014 211 33.4997128635599 18.7901350684769 NA NA
"1290" "Struptjärn" 2014 212 39.9201741691134 22.3913998203462 NA NA
"1291" "Struptjärn" 2014 213 36.1483799192999 22.5012336268514 NA NA
"1292" "Struptjärn" 2014 214 36.294830256324 22.5923943719655 NA NA
"1293" "Struptjärn" 2014 215 37.2654809329655 23.1965939984475 NA NA
"1294" "Struptjärn" 2014 216 38.7423380097368 24.1158912447442 NA NA
"1295" "Struptjärn" 2014 217 39.6188994695803 24.6615232824805 41.022879955972 15.2098784062288
"1296" "Struptjärn" 2014 218 37.085360684088 23.0844747884036 NA NA
"1297" "Struptjärn" 2014 219 33.8745282990622 21.0858322546741 NA NA
"1298" "Struptjärn" 2014 220 31.5865703161672 19.6616501138293 NA NA
"1299" "Struptjärn" 2014 221 29.5385173592394 18.3868013331405 NA NA
"1300" "Struptjärn" 2014 222 26.3434342964829 16.3979622589474 NA NA
"1301" "Struptjärn" 2014 223 23.6096172638926 14.6962468326763 NA NA
"1302" "Struptjärn" 2014 224 26.8690624446621 12.8417220165673 NA NA
"1303" "Struptjärn" 2014 225 26.1301638221862 9.68816950191796 NA NA
"1304" "Struptjärn" 2014 226 26.3530896304211 9.77082275396907 NA NA
"1305" "Struptjärn" 2014 227 26.6928178924251 9.8967823541187 NA NA
"1306" "Struptjärn" 2014 228 26.4583160441919 9.80983710304194 NA NA
"1307" "Struptjärn" 2014 229 26.3012025551097 9.75158480414235 NA NA
"1308" "Struptjärn" 2014 230 58.5306009741851 21.7011415292224 NA NA
"1309" "Struptjärn" 2014 231 47.3632193312209 17.5606590207361 38.0609818090939 14.11170805071
"1310" "Struptjärn" 2014 232 33.0234600830787 12.2439675848125 NA NA
"1311" "Struptjärn" 2014 233 25.3374366808168 9.39425343745622 NA NA
"1312" "Struptjärn" 2014 234 34.7942134693651 12.9005022728144 NA NA
"1313" "Struptjärn" 2014 235 75.0934770953625 27.8420885356469 NA NA
"1314" "Struptjärn" 2014 236 80.0840622777407 29.6924265392528 NA NA
"1315" "Struptjärn" 2014 237 131.507357486342 48.7584225934031 NA NA
"1316" "Struptjärn" 2014 238 68.2800921558417 25.315918832882 NA NA
"1317" "Struptjärn" 2014 239 42.2148940731913 15.6518364013981 NA NA
"1318" "Struptjärn" 2014 240 31.1825130900219 11.5614075123174 NA NA
"1319" "Struptjärn" 2014 241 25.4415972191041 9.4328725964177 NA NA
"1320" "Struptjärn" 2014 242 19.9015223519823 7.37880264372878 NA NA
"1321" "Struptjärn" 2014 243 14.9248841288453 5.53363569477388 NA NA
"1322" "Struptjärn" 2014 244 12.6645790139789 4.69559199830518 NA NA
"1323" "Struptjärn" 2014 245 11.2588727903456 4.17440429136485 10.9340893090602 4.05398570388381
"1324" "Struptjärn" 2014 246 11.5075864911314 4.26661881045701 NA NA
"1325" "Struptjärn" 2014 247 10.8389287132719 4.01870341525467 NA NA
"1326" "Struptjärn" 2014 248 10.1700694466507 3.77071331492271 NA NA
"1327" "Struptjärn" 2014 249 9.03042328386646 3.34817156308381 NA NA
"1328" "Struptjärn" 2014 250 8.97080607005419 3.32606754274257 NA NA
"1329" "Struptjärn" 2014 251 9.4215298948811 3.49318049477727 NA NA
"1330" "Struptjärn" 2014 252 9.99398547355 3.70542741049518 NA NA
"1331" "Struptjärn" 2014 253 10.1784445994604 3.77381853464415 8.35369963340325 3.09726561866421
"1332" "Struptjärn" 2014 254 9.22110596507776 3.41887016831362 NA NA
"1333" "Struptjärn" 2014 255 9.48910801424463 3.51823614614899 NA NA
"1334" "Struptjärn" 2014 256 8.71465853768337 3.23109681358857 NA NA
"1335" "Struptjärn" 2014 257 9.16496090648749 3.39805350416949 NA NA
"1336" "Struptjärn" 2014 258 8.81874413392294 3.26968818660633 NA NA
"1337" "Struptjärn" 2014 259 9.64911770403475 3.57756225704462 9.06504913363794 3.36100964186573
"1338" "Struptjärn" 2014 260 10.4223149306843 3.86423729824103 NA NA
"1339" "Struptjärn" 2014 261 9.20833394766744 3.41413474183889 NA NA
"1340" "Struptjärn" 2014 262 9.86205030097469 3.65651036872413 NA NA
"1341" "Struptjärn" 2014 263 9.90656384574992 3.67301446605196 NA NA
"1342" "Struptjärn" 2014 264 9.95744201214204 3.69956191909503 NA NA
"1343" "Struptjärn" 2014 265 11.1302175049186 4.13698852086663 NA NA
"1344" "Struptjärn" 2014 266 10.7714528256805 4.00295112995003 NA NA
"1345" "Struptjärn" 2014 267 10.3295829324558 3.83799063485069 NA NA
"1346" "Struptjärn" 2014 268 9.70648830908694 3.61168359885575 NA NA
"1347" "Struptjärn" 2014 269 11.3207006986546 4.21398270972357 NA NA
"1348" "Struptjärn" 2014 270 16.8016450094218 6.28600123722692 NA NA
"1349" "Struptjärn" 2014 271 15.9126138407557 5.93967319554629 NA NA
"1350" "Struptjärn" 2014 272 14.9978153236379 5.58708437448076 NA NA
"1351" "Struptjärn" 2014 273 13.4452046307629 4.99555550501222 11.4452936078867 4.24352274356111
"1352" "Struptjärn" 2014 274 12.3822610576117 4.59091817255602 NA NA
"1353" "Struptjärn" 2015 151 94.2794607586354 34.9555939486132 NA NA
"1354" "Struptjärn" 2015 152 132.797260355929 49.236674384192 NA NA
"1355" "Struptjärn" 2015 153 124.200707163969 46.0493669864003 NA NA
"1356" "Struptjärn" 2015 154 113.291413676501 42.0045747236353 NA NA
"1357" "Struptjärn" 2015 155 101.774565016885 37.7345218184346 NA NA
"1358" "Struptjärn" 2015 156 78.2390532441369 29.0083604012922 NA NA
"1359" "Struptjärn" 2015 157 71.3981786738499 26.471998485259 NA NA
"1360" "Struptjärn" 2015 158 122.919444726286 45.5743187717323 NA NA
"1361" "Struptjärn" 2015 159 97.3914429564225 36.1094103281919 NA NA
"1362" "Struptjärn" 2015 160 73.4409976178571 27.2294057608485 58.645631895391 21.7437910537409
"1363" "Struptjärn" 2015 161 58.7171492863277 21.7703072520489 NA NA
"1364" "Struptjärn" 2015 162 42.9580409252084 15.9273697932341 NA NA
"1365" "Struptjärn" 2015 163 35.2755960929877 13.078982457044 NA NA
"1366" "Struptjärn" 2015 164 33.9879789672206 12.6015781417518 NA NA
"1367" "Struptjärn" 2015 165 27.5101535805338 10.1998224246 NA NA
"1368" "Struptjärn" 2015 166 25.8348743937063 9.57868629872392 NA NA
"1369" "Struptjärn" 2015 167 21.2775691721366 7.88899366001745 NA NA
"1370" "Struptjärn" 2015 168 18.7387609940059 6.94769056946039 NA NA
"1371" "Struptjärn" 2015 169 16.6898458888208 6.18802304616614 NA NA
"1372" "Struptjärn" 2015 170 16.558169907954 6.13920210380046 NA NA
"1373" "Struptjärn" 2015 171 15.7654640810838 5.84529394202477 NA NA
"1374" "Struptjärn" 2015 172 15.6557616120464 5.80462002501275 NA NA
"1375" "Struptjärn" 2015 173 16.4421169791527 6.09617365388056 NA NA
"1376" "Struptjärn" 2015 174 16.7565451033414 6.21275282973419 15.9611137648541 5.9178341416294
"1377" "Struptjärn" 2015 175 20.940082172262 7.76386504307773 NA NA
"1378" "Struptjärn" 2015 176 64.8900040643284 24.0589903160723 NA NA
"1379" "Struptjärn" 2015 177 44.9143623642508 16.6527067574665 NA NA
"1380" "Struptjärn" 2015 178 244.191397767134 90.5378040710782 NA NA
"1381" "Struptjärn" 2015 179 129.843214967482 48.1414155624568 NA NA
"1382" "Struptjärn" 2015 180 73.3206238323493 27.1847752852984 NA NA
"1383" "Struptjärn" 2015 181 56.2447191230041 20.8536148552107 NA NA
"1384" "Struptjärn" 2015 182 42.4537354709985 15.7403906087799 NA NA
"1385" "Struptjärn" 2015 183 32.6076409333143 12.0897960904248 NA NA
"1386" "Struptjärn" 2015 184 27.615346934771 10.2388245163305 NA NA
"1387" "Struptjärn" 2015 185 23.1975585805409 8.60085995205783 NA NA
"1388" "Struptjärn" 2015 186 18.2473464996353 6.76549091125851 NA NA
"1389" "Struptjärn" 2015 187 14.6841809673456 5.44439120920058 NA NA
"1390" "Struptjärn" 2015 188 35.5147308139978 13.16764541862 NA NA
"1391" "Struptjärn" 2015 189 44.5583866348254 16.5207231530501 NA NA
"1392" "Struptjärn" 2015 190 77.1682264228562 28.6113345034691 37.0440621136362 13.7346690682347
"1393" "Struptjärn" 2015 191 199.249722291642 73.8749705477358 NA NA
"1394" "Struptjärn" 2015 192 124.82145146393 46.2795177055575 NA NA
"1395" "Struptjärn" 2015 193 127.364891026255 47.2225379546983 NA NA
"1396" "Struptjärn" 2015 194 87.1915412488108 32.3276362329854 NA NA
"1397" "Struptjärn" 2015 195 58.5051819643931 21.6917170312701 NA NA
"1398" "Struptjärn" 2015 196 77.6342242330109 28.7841105259626 NA NA
"1399" "Struptjärn" 2015 197 113.907786895551 42.2331047957479 NA NA
"1400" "Struptjärn" 2015 198 80.4052472616759 29.8115109272043 NA NA
"1401" "Struptjärn" 2015 199 54.3827606509441 20.1632644461737 NA NA
"1402" "Struptjärn" 2015 200 51.884805293602 19.23710818191 NA NA
"1403" "Struptjärn" 2015 201 31.1225727703334 11.5391836953872 NA NA
"1404" "Struptjärn" 2015 202 20.9580931472302 7.7705428955234 23.4521641344607 8.6952589684318
"1405" "Struptjärn" 2015 203 19.4164026504076 7.19893687903023 NA NA
"1406" "Struptjärn" 2015 204 20.5119235405785 7.60511849155637 NA NA
"1407" "Struptjärn" 2015 205 38.6932413712618 14.3461282345702 NA NA
"1408" "Struptjärn" 2015 206 29.8741925482748 11.0763270796978 NA NA
"1409" "Struptjärn" 2015 207 57.4351192077305 21.2949744224299 NA NA
"1410" "Struptjärn" 2015 208 478.338032781883 177.351354256345 NA NA
"1411" "Struptjärn" 2015 209 351.59201748243 130.358274217896 NA NA
"1412" "Struptjärn" 2015 210 210.593339867977 78.0807953023114 NA NA
"1413" "Struptjärn" 2015 211 238.547822230553 88.4453596161814 NA NA
"1414" "Struptjärn" 2015 212 223.237571113958 82.7688430453763 NA NA
"1415" "Struptjärn" 2015 213 170.482187743895 63.2089543395168 NA NA
"1416" "Struptjärn" 2015 214 150.803281273493 55.9126900376537 NA NA
"1417" "Struptjärn" 2015 215 124.579307784544 46.1897391253055 NA NA
"1418" "Struptjärn" 2015 216 105.46790055082 39.103884097359 NA NA
"1419" "Struptjärn" 2015 217 91.5744862814613 33.9526820873805 NA NA
"1420" "Struptjärn" 2015 218 90.5531209251748 33.5739948061821 96.5306717161727 35.7902658431185
"1421" "Struptjärn" 2015 219 80.6912299953834 29.9175435268326 NA NA
"1422" "Struptjärn" 2015 220 66.7761030484252 24.7582911998964 NA NA
"1423" "Struptjärn" 2015 221 52.0143804515181 19.2851502111017 NA NA
"1424" "Struptjärn" 2015 222 45.9867835763727 17.0503238007882 NA NA
"1425" "Struptjärn" 2015 223 47.0499402368472 17.4445058657711 NA NA
"1426" "Struptjärn" 2015 224 45.4313073522727 16.8443722480162 NA NA
"1427" "Struptjärn" 2015 225 33.8727592609395 12.5588586221955 NA NA
"1428" "Struptjärn" 2015 226 28.2395390974222 10.4702535848463 NA NA
"1429" "Struptjärn" 2015 227 25.5700032254805 9.48048114427468 NA NA
"1430" "Struptjärn" 2015 228 22.0297799391087 8.16788764098075 NA NA
"1431" "Struptjärn" 2015 229 18.9130458150233 7.01230940993601 NA NA
"1432" "Struptjärn" 2015 230 15.7680123116684 7.0174778934247 15.1375782182464 5.61249537602947
"1433" "Struptjärn" 2015 231 12.9489344982065 6.6478664488528 NA NA
"1434" "Struptjärn" 2015 232 11.6101847290959 7.2269761362337 NA NA
"1435" "Struptjärn" 2015 233 10.5098360507142 6.5420435683416 NA NA
"1436" "Struptjärn" 2015 234 9.09728645899057 5.66277571612131 NA NA
"1437" "Struptjärn" 2015 235 8.19874940869179 5.1034645620311 NA NA
"1438" "Struptjärn" 2015 236 7.70846368591022 4.79827706491929 NA NA
"1439" "Struptjärn" 2015 237 6.62069590725486 4.12117571282751 NA NA
"1440" "Struptjärn" 2015 238 7.42102964389864 4.61935838181229 NA NA
"1441" "Struptjärn" 2015 239 9.62947630839553 5.99404721880091 NA NA
"1442" "Struptjärn" 2015 240 43.6215756198649 16.9807522565279 NA NA
"1443" "Struptjärn" 2015 241 29.3108549643273 10.8674608040317 NA NA
"1444" "Struptjärn" 2015 242 17.9727100655862 6.66366513080891 NA NA
"1445" "Struptjärn" 2015 243 13.2533538795667 4.91388954649888 NA NA
"1446" "Struptjärn" 2015 244 10.9142156433195 4.04661722951716 NA NA
"1447" "Struptjärn" 2015 245 11.7297656258225 4.34899522153976 NA NA
"1448" "Struptjärn" 2015 246 9.5327957221972 3.53443405147691 8.20851465224346 3.04343600182061
"1449" "Struptjärn" 2015 247 7.12696239256474 2.6424334789029 NA NA
"1450" "Struptjärn" 2015 248 8.41800763324881 3.12110882175596 NA NA
"1451" "Struptjärn" 2015 249 8.76459040324217 3.24960983862631 NA NA
"1452" "Struptjärn" 2015 250 6.71670359196509 2.49032357148286 NA NA
"1453" "Struptjärn" 2015 251 5.9060169740204 2.18974874841512 NA NA
"1454" "Struptjärn" 2015 252 5.41236951046442 2.00672118174286 NA NA
"1455" "Struptjärn" 2015 253 5.41115763270277 2.00627185898889 NA NA
"1456" "Struptjärn" 2015 254 5.29255836859476 1.96229931517707 NA NA
"1457" "Struptjärn" 2015 255 5.33240737964191 1.97707396320973 NA NA
"1458" "Struptjärn" 2015 256 6.25275465030204 2.31830719922994 NA NA
"1459" "Struptjärn" 2015 257 7.12902445417086 2.7864074216875 NA NA
"1460" "Struptjärn" 2015 258 6.73764130001617 3.89824197613768 NA NA
"1461" "Struptjärn" 2015 259 15.1421556932192 5.93079443673154 16.8691064744237 6.25448672967581
"1462" "Struptjärn" 2015 260 36.8321810279278 13.6561108208941 NA NA
"1463" "Struptjärn" 2015 261 465.416410945264 172.560459585927 NA NA
"1464" "Struptjärn" 2015 262 453.170652664999 168.020151966502 NA NA
"1465" "Struptjärn" 2015 263 233.975407321574 86.7500648230555 NA NA
"1466" "Struptjärn" 2015 264 190.522949710071 70.6393822617116 NA NA
"1467" "Struptjärn" 2015 265 151.821891713994 56.2903558904647 NA NA
"1468" "Struptjärn" 2015 266 169.191676362349 62.7304769333414 NA NA
"1469" "Struptjärn" 2015 267 203.734837617842 75.537897646531 NA NA
"1470" "Struptjärn" 2015 268 193.910879833995 71.8955106780732 NA NA
"1471" "Struptjärn" 2015 269 158.046334553236 58.5981660401423 NA NA
"1472" "Struptjärn" 2015 270 128.902449723184 47.7926120413502 NA NA
"1473" "Struptjärn" 2015 271 109.843681902082 40.7262739041293 NA NA
"1474" "Struptjärn" 2015 272 95.3814074771015 35.3641580381164 84.4992558332642 31.3294290410654
"1475" "Struptjärn" 2015 273 88.4427874370241 32.7915554507343 NA NA
"1476" "Struptjärn" 2015 274 79.9274267271368 29.6343514435664 NA NA
