# Supplementary material for: Greenhouse gas emissions from boreal inland waters unchanged after forest harvesting
Source: Copernicus journal article supplement (doi:10.5194/bg-2018-217), 2018-05-15
Supplement: Supplementary file 1 [file bg-2018-217-supplement.zip › Suppl_File_S4_DATA_Fig6_7.xlsx]

## Sheet: Sheet1
						Before					After
						Control		Impact			Control		Impact
Figure	Gas	Flux type	System	Method	k model	mean	se	mean	se	n	mean	se	mean	se	n
6A)	CO2	Diffusion	Lake	Logger	Cole	52.7483	1.99182	43.1487	1.36288	242	50.2338	1.03918	41.4738	0.67751	726
-	CO2	Diffusion	Lake	Logger	Vachon	75.3769	2.26626	58.7559	1.93823	242	72.2249	1.35232	56.4053	0.912	726
-	CO2	Diffusion	Lake	Logger	Heiskanen	98.41	4.02862	76.37	3.31459	242	98.9764	2.42895	73.8534	1.43251	726
6D)	CO2	Diffusion	Stream	Logger	This study	357.272	30.1249	86.9851	4.77982	246	292.918	23.6779	71.62	2.83778	739
6B)	CH4	Diffusion	Lake	Spot	Cole	0.17421	0.01579	0.3451	0.07837	19	0.26109	0.05024	0.53073	0.1194	56
-	CH4	Diffusion	Lake	Spot	Vachon	0.24483	0.02184	0.46963	0.1059	19	0.37061	0.06768	0.74722	0.17615	56
-	CH4	Diffusion	Lake	Spot	Heiskanen	0.27896	0.03571	0.38238	0.09066	19	0.45043	0.09971	0.80703	0.27274	56
7	CH4	Diffusion+Ebullition	Lake	Chamber	-	0.22257	0.05736	0.48962	0.21159	16	0.45344	0.0999	0.5199	0.1288	20
7	CH4	Diffusion	Lake	Chamber	-	0.07571	0.00769	0.10992	0.02645	16	0.07671	0.0122	0.14436	0.03152	20
7	CH4	Ebullition	Lake	Chamber	-	0.18628	0.05987	0.45445	0.1735	16	0.31655	0.0815	0.36063	0.13143	20
6E)	CH4	Diffusion	Stream	Spot	This study	1.30331	0.39008	0.07009	0.0643	19	1.19478	0.2077	0.17626	0.14359	58
6C)	N2O	Diffusion	Lake	Spot	Cole	2.20162	1.2959	2.52718	0.79207	19	1.77712	0.5337	0.44036	0.34123	32
-	N2O	Diffusion	Lake	Spot	Vachon	2.99541	1.72974	3.4935	1.1398	19	2.55813	0.76902	0.60232	0.48691	32
-	N2O	Diffusion	Lake	Spot	Heiskanen	2.87561	2.5949	3.53018	1.41949	19	3.24135	0.95323	0.49632	0.54113	32
6F)	N2O	Diffusion	Stream	Spot	This study	2.54839	2.57894	3.53008	1.09821	18	2.18922	1.04757	1.7337	0.6674	32
