# Supplementary material for: Greenhouse gas emissions from boreal inland waters unchanged after forest harvesting
Source: Copernicus journal article supplement (doi:10.5194/bg-2018-217), 2018-05-15
Supplement: Supplementary file 1 [file bg-2018-217-supplement.zip › Suppl_File_S5_DATA_Fig8.xlsx]

## Sheet: Sheet1
				Before					After
				Control		Impact			Control		Impact
Figure	Gas	Catchment	Distance to lake [m]	mean	se	mean	se	n	mean	se	mean	se	n
8B)	CO2	Lillsjölidtjärnen	46	462.02	167.472	102.11	18.6391	10	196.877	35.0328	61.9718	11.9106	20
8B)	CO2	Lillsjölidtjärnen	90	465.015	177.372	192.496	23.3691	10	203.656	35.9551	160.695	18.449	20
8B)	CO2	Lillsjölidtjärnen	134	278.718	97.8857	206.649	33.4151	10	164.798	19.4623	150.036	27.6857	20
8B)	CO2	Lillsjölidtjärnen	195	292.572	95.3902	101.826	14.3097	10	171.842	20.1808	77.0184	10.8594	20
8B)	CO2	Lillsjölidtjärnen	256	113.782	19.8628	91.3134	13.0112	10	138.329	15.4862	63.0101	11.0763	20
8B)	CO2	Struptjärn	63	495.352	196.701	59.0896	9.53988	8	186.35	32.2141	45.4823	10.2645	21
8B)	CO2	Struptjärn	103	440.865	168.326	68.7129	10.1748	8	193.56	32.6499	45.6993	9.48001	21
8B)	CO2	Struptjärn	140	276.727	97.7736	99.6116	16.8109	8	165.176	17.1218	85.5352	16.7323	21
8B)	CO2	Struptjärn	197	295.887	96.2945	49.963	10.8803	8	171.764	18.2869	51.7519	11.2631	21
8B)	CO2	Struptjärn	283	138.35	21.2978	43.405	10.4618	8	148.887	15.9404	47.28	9.56857	21
8D)	CH4	Lillsjölidtjärnen	46	0.45313	0.26256	-0.01846	0.01228	10	1.54143	1.32919	0.04509	0.03538	18
8D)	CH4	Lillsjölidtjärnen	90	1.32596	0.58597	-0.01498	0.02821	10	1.37575	0.38384	0.30643	0.15711	17
8D)	CH4	Lillsjölidtjärnen	134	0.90225	0.23764	0.19181	0.06095	10	1.87842	0.76672	0.30762	0.14291	17
8D)	CH4	Lillsjölidtjärnen	195	1.27727	0.3782	0.01224	0.02655	10	2.37993	0.95017	0.08244	0.05356	17
8D)	CH4	Lillsjölidtjärnen	256	1.76378	0.85412	-0.0086	0.01389	10	5.4342	2.08176	0.09103	0.04538	18
8D)	CH4	Struptjärn	63	0.48886	0.33248	0.21193	0.16469	8	1.25255	1.06755	0.61392	0.46241	18
8D)	CH4	Struptjärn	103	1.30906	0.62262	0.7824	0.81067	8	1.27096	0.37626	0.3647	0.3309	18
8D)	CH4	Struptjärn	140	0.94426	0.296	0.54267	0.40839	8	1.70064	0.68744	0.56341	0.3242	18
8D)	CH4	Struptjärn	197	1.3504	0.42014	0.01604	0.01234	8	2.08611	0.74288	0.11226	0.12005	18
8D)	CH4	Struptjärn	283	2.08227	1.05632	0.0592	0.03256	8	6.41951	2.1363	0.07203	0.03796	18
